# Supplementary material for: Investigation of the rhodium-catalyzed hydroboration of NHC-boranes: the role of alkene coordination and the origin of enantioselectivity
Source: Royal Society of Chemistry journal article supplement (doi:10.1039/c9dt03660a), 2019-01-01
Supplement: c9dt03660a1.pdf [file c9dt03660a1.pdf]

# Investigation of Rhodium Catalyzed Hydroboration with NHC-Boranes: Role of the Alkene Coordination and Origin of the Enantioselectivity

## SUPPORTING INFORMATION

*Paola Nava, \* Momar Toure, Amel Abdou Mohamed, Jean-Luc Parrain and Olivier Chuzel\**

Aix Marseille Univ, CNRS, Centrale Marseille, iSm2, Marseille, France.

**\*Paola Nava: e-mail: [paola.nava@univ-amu.fr](mailto:paola.nava@univ-amu.fr)**

**\*Olivier Chuzel: e-mail: [olivier.chuzel@univ-amu.fr](mailto:olivier.chuzel@univ-amu.fr)**

### Summary

|                                                      |    |
|------------------------------------------------------|----|
| 1- Experimental procedures .....                     | 2  |
| 2- Comparison between computational methods .....    | 5  |
| 2.1. Model system .....                              | 7  |
| 2.2. Real system .....                               | 9  |
| 3. Mechanism through the [Rh]-B migratory step ..... | 10 |
| 4. Substitution of the <i>R</i> product .....        | 12 |
| 4.1. Alkene approach .....                           | 12 |
| 4.2. BH <sub>3</sub> Approach .....                  | 12 |
| 5. Energies and xyz coordinates .....                | 13 |

## 1- Experimental procedures

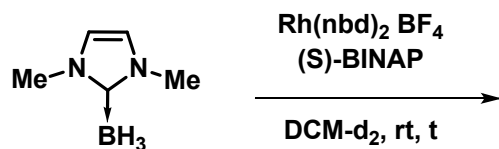

NHC-borane **3** (0.109 mmol, 1 equiv),  $[\text{Rh}(\text{nbd})_2]\text{BF}_4$  (0.109 mmol, 1 equiv) and (*S*)-Binap (0.109 mmol, 1 equiv) were added in 10 mL Schlenk flask under argon and dissolved in dry and degas deuterated dichloromethane (0.87 mL) at room temperature.

$^1\text{H}$  NMR (400 MHz,  $\text{CD}_2\text{Cl}_2$ )

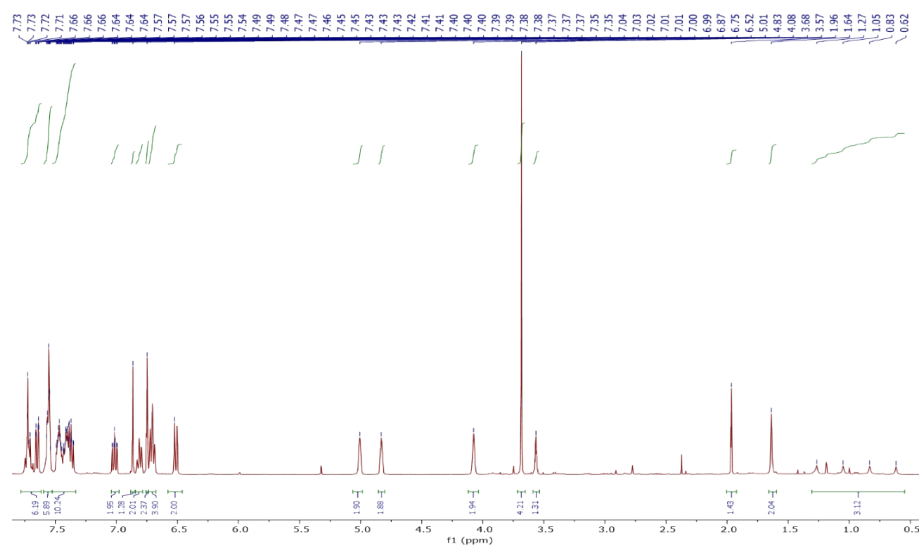

$^{11}\text{B}$  NMR (128 MHz,  $\text{CD}_2\text{Cl}_2$ )

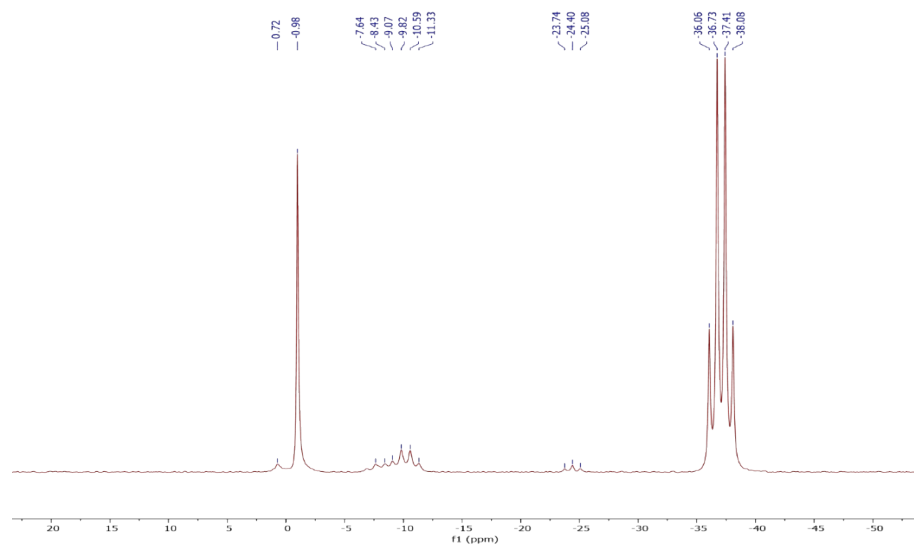



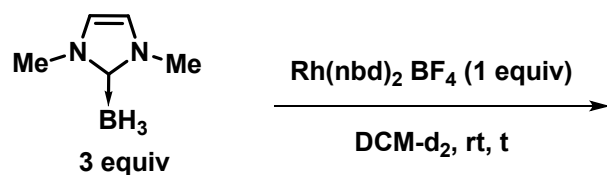

NHC-borane **3** (0.109 mmol, 3 equiv) and  $[\text{Rh}(\text{nbd})_2]\text{BF}_4$  (0.636 mmol, 1 equiv) were added in 10 mL Schlenk flask under argon and dissolved in dry and degas deuterated dichloromethane (0.87 mL) at room temperature.

$^1\text{H}$  NMR (400 MHz,  $\text{CD}_2\text{Cl}_2$ )

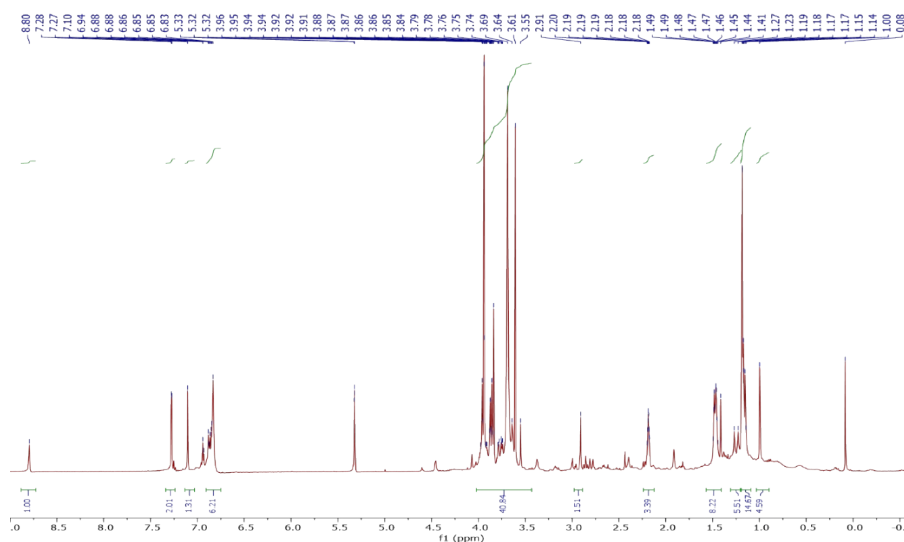

$^{11}\text{B}$  NMR (128 MHz,  $\text{CD}_2\text{Cl}_2$ )

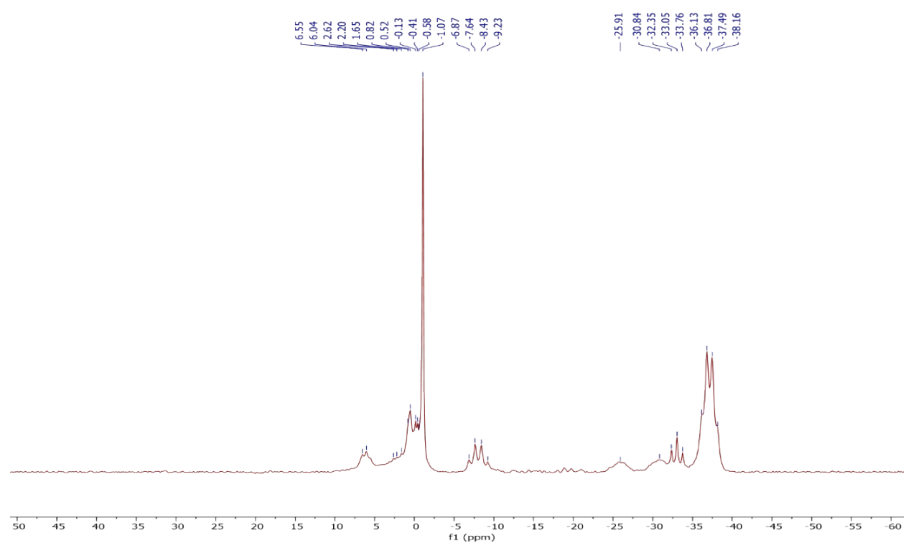

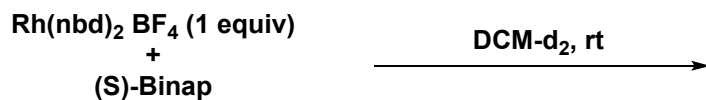

[Rh(nbd)<sub>2</sub>]BF<sub>4</sub> (0.109 mmol, 1 equiv) and (S)-Binap (0.109 mmol, 1 equiv) were added in 10 mL Schlenk flask under argon and dissolved dry and degas deuterated dichloromethane (0.87 mL) at room temperature.

<sup>1</sup>H NMR (400 MHz, CD<sub>2</sub>Cl<sub>2</sub>)

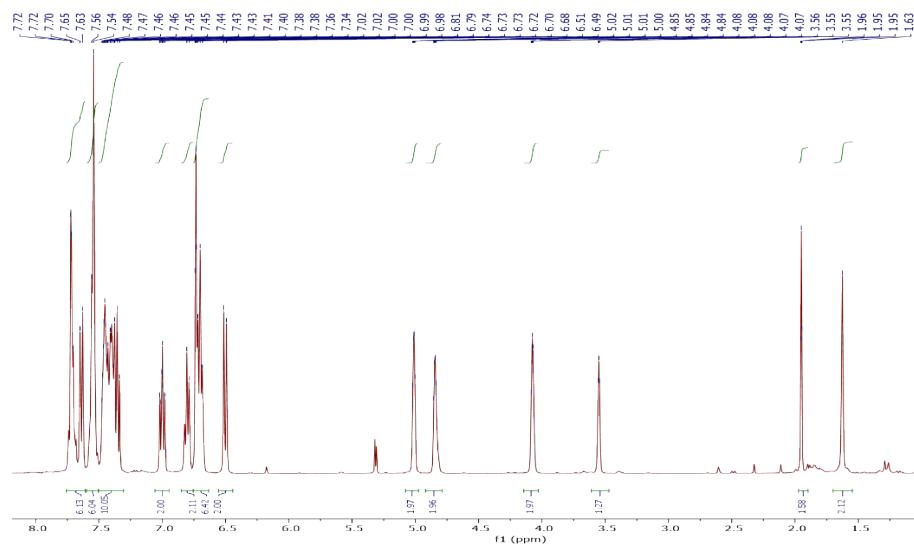

## 2- Comparison between computational methods

The RPA method includes dispersion effects in a non-empirical way and it does accurately take into account the interaction between the bulky ligand and the substrate, which is crucial for the enantioselectivity in our case. It is important, however, that this method reproduces correctly energies of the transition states. We cannot afford to do accurate CCSD(T) calculations on the real system. We have performed some CCSD(T) calculations (def2-QZVP basis set) on transition states for the hydride formation with a Wilkinson-type catalyst and H<sub>2</sub> or BH<sub>3</sub>-NH<sub>3</sub> (Scheme S1).

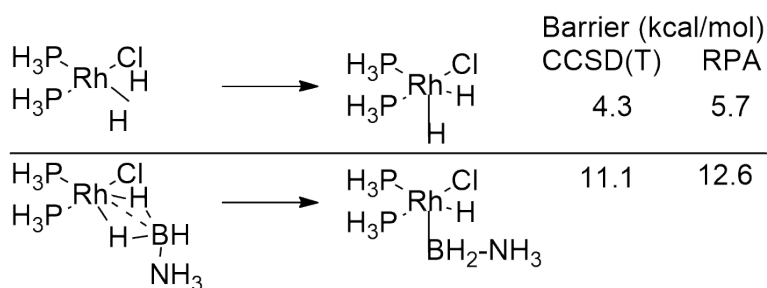

**Scheme S1.** Hydride formation with a Wilkinson-type catalyst.

The RPA calculations underestimate the energy barrier (electronic energy) by only 1.5 kcal/mol. The fact that this underestimation is small and systematic in the two cases, suggests that the error is the same for the pro-R and pro-S paths and it does not affect the comparison.

As DFT calculations were already employed for mechanistic studies of this kind, the comparison with several DFT functionals and B2PLYP allows us to check that there is not a major bias in the use of RPA for the other steps.

Structures discussed in the main article are optimized at the PBE-D3 level by using a def2-SVP basis set. Energies are obtained as single point calculations at the RPA (Random-Phase-Approximation) level (PBE functional) with a def2-QZVP basis set. Since RPA calculations are not routinely used for computations of mechanistic profiles yet, some preliminary calculations have been performed to check for accuracy. Two sets of calculations have been performed: a) the reaction profile has been computed for a model system: the (S)-MeO-xylyl-BIPHEP ligand was replaced by a simpler ligand L (the 4 aryl groups on the P atoms were replaced by H atoms) and the methyl group on the NHC was replaced by a hydrogen atom; b) the real system has been computed at the B2PLYP (basis set def2-TZVP) method as well (see the article for labels).

## 2.1. Model system

**Table S1.** Electronic energies (relative to the isolated [LRhNBD]<sup>+</sup> and the modified **1** systems, kcal/mol) for the hydroboration reaction in the model system. Energies barriers are also reported. Labels as in the article.

|                            | <b>BP86</b> | <b>PBE</b> | <b>BP86-D3</b> | <b>PBE-D3</b> | <b>PBE0</b> | <b>B3LYP</b> | <b>M06</b> | <b>B2PLYP</b> | <b>RPA</b> |
|----------------------------|-------------|------------|----------------|---------------|-------------|--------------|------------|---------------|------------|
| <b>II</b>                  | -3.95       | -4.32      | -6.64          | -5.70         | -3.83       | -2.82        | -4.6       | -2.98         | -3.95      |
| <b>Ts<sub>II-III</sub></b> | 8.42        | 8.47       | 4.94           | 6.60          | 10.60       | 10.95        | 9.4        | 8.92          | 7.61       |
| <b>III</b>                 | 6.50        | 6.27       | 1.25           | 3.46          | 8.43        | 9.48         | 8.0        | 5.23          | 3.29       |
| <b>Ts<sub>III-IV</sub></b> | 9.19        | 8.72       | 4.20           | 6.09          | 10.30       | 12.86        | 10.8       | 8.45          | 6.51       |
| <b>IV</b>                  | 4.33        | 3.80       | -0.69          | 1.13          | 4.50        | 6.61         | 3.7        | 3.11          | 1.50       |
| <b>Ts<sub>IV-VI</sub></b>  | 15.47       | 15.28      | 14.17          | 14.47         | 15.48       | 16.96        | 14.2       | 17.36         | 15.59      |
| <b>VI</b>                  | -12.20      | -12.12     | -11.09         | -11.59        | -15.13      | -14.03       | -12.8      | -10.43        | -8.15      |
| <b>Computed barriers</b>   |             |            |                |               |             |              |            |               |            |
| <b>II to III</b>           | 12.37       | 12.79      | 11.58          | 12.3          | 14.43       | 13.77        | 14.00      | 11.9          | 11.56      |
| <b>III to IV</b>           | 2.69        | 2.45       | 2.95           | 2.63          | 1.87        | 3.38         | 1.87       | 3.22          | 3.22       |
| <b>IV to VI</b>            | 11.14       | 14.86      | 14.86          | 13.34         | 10.98       | 10.35        | 10.98      | 14.25         | 14.09      |

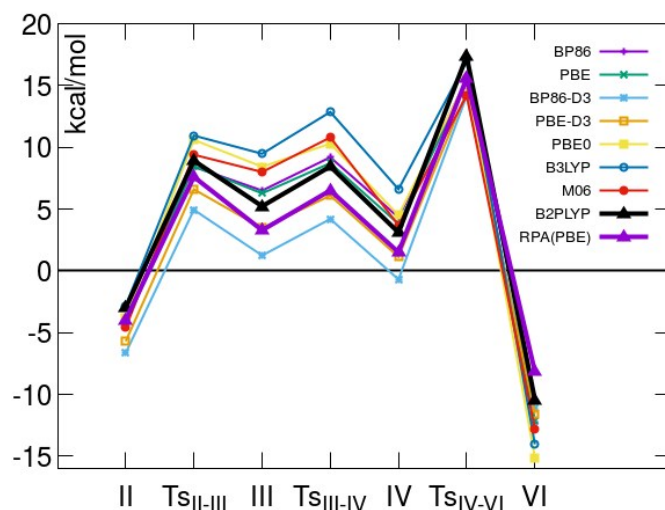

**Figure S1** Energetic profiles for the reaction in the model systems, *via* the [Rh]-H migratory insertion mechanism. Comparison of several methods. See the article for labels (Figure 1). Energies are relative to isolated [LRhNBD]<sup>+</sup> and the modified **1** systems.

In the model system we computed only the mechanism through the [Rh]-H migratory insertion step. For DFT calculations, structures were re-optimized at each functional (basis set: def2-SVP), for B2PLYP (def2-TZVP) and RPA (def2-QZVP), single point energy calculations are performed on the PBE-D3 structures. Electronic energies, reported in Table S1 and depicted in Figure S.1 are related to the isolated [LRhNBD]<sup>+</sup> and the modified **1** systems. The conformational change from intermediates **C** to **D** is not necessary. The transition state **Ts<sub>CE</sub>** corresponds to the reductive elimination.

The main result here is that all methods perform very similarly, since the curves are almost parallel. The methods that contain the semi-empirical dispersion factors are the lowest curves. This might be due to an overestimation of the stabilization of intermediate **A**, which is obtained by substitution of the NBD by the substrate. Table S1 reports as well the barriers between the intermediates. Interestingly, the RPA and the B2PLYP methods provide the same barrier heights. Furthermore, we notice that for this model system, where the L ligand has not the same steric hindrance than the real one, the highest energy is computed for the transition state responsible for the reductive elimination. The methods that do not contain dispersion corrections, tend to slightly underestimate the barrier of the reductive elimination step, thus overestimating the steric decompression that this event causes.



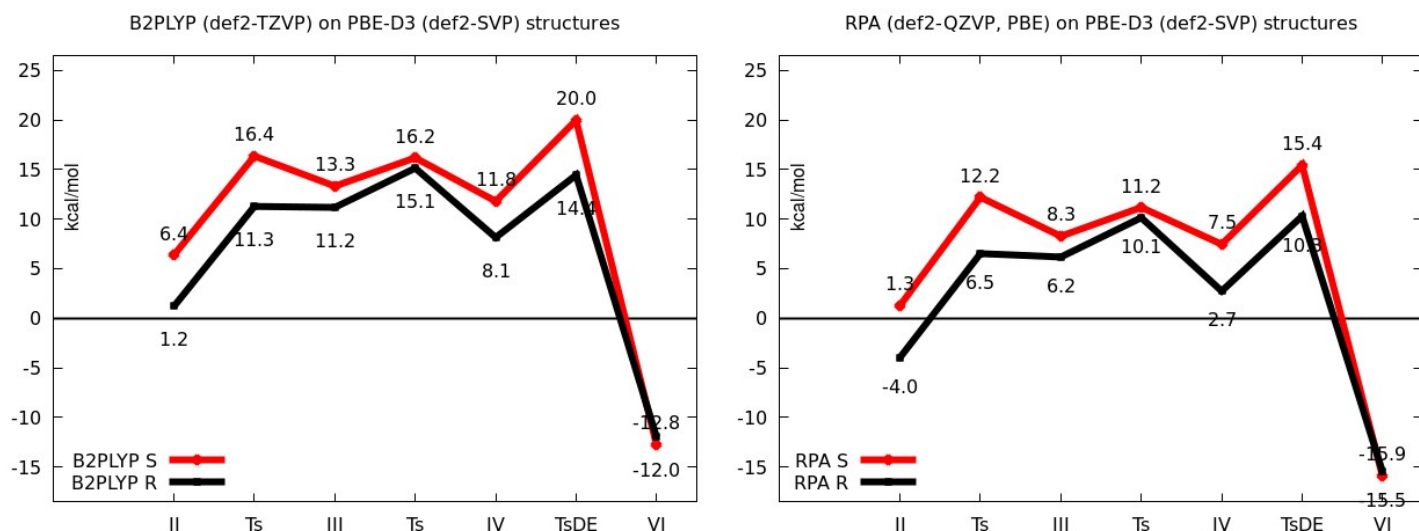

**Fig. S2** Comparison between the computed energetic profiles at the B2PLYP and RPA methods for the real system, *via* the [Rh]-H migratory insertion mechanism. Energies are relative to isolated [LRhNBD]<sup>+</sup> and the modified **1** systems.

## 2.2. Real system

We compare now the B2PLYP and RPA pro-*R* and pro-*S* computed energetic pathway for the real system, *via* the [Rh]-H migratory insertion step (structures are obtained at the PBE-D3 level, by employing the def2-SVP basis set. Single point calculations at the B2PLYP and RPA levels are performed with a def2-TZVP basis set, Figure S2). Here again we notice that the RPA and the B2PLYP curves are parallel. The deviation from the two methods is due to the position of our zero for the energy (isolated [LRhNBD]<sup>+</sup> and substrate), which causes (only) a shift between the two methods.

### 3. Mechanism through the [Rh]-B migratory step

Besides the mechanism *via* the [Rh]-H migratory insertion, another pathway could be invoked, *via* a [Rh]-B migratory insertion step, instead of through the Rh-H migratory insertion into the alkene moiety (Scheme S2). From **I**, after a first transition state, a hydride structure **III<sub>B</sub>** results. The B-C bond is then formed (**IV<sub>B</sub>**) and the reductive elimination leads to the final product **VI**, coordinated to the metal.

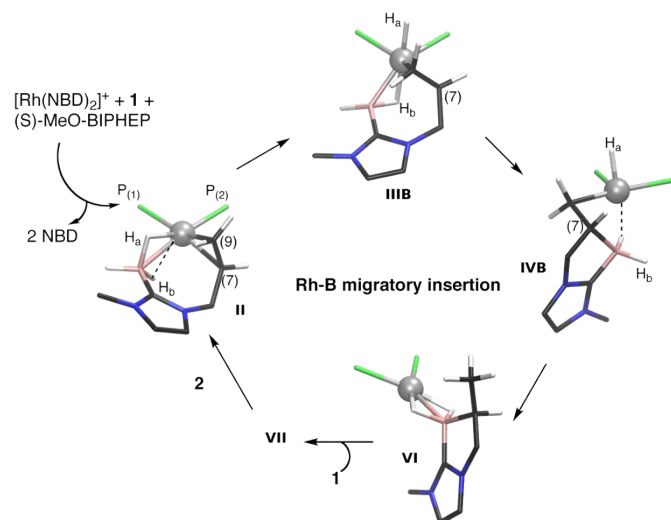

**Scheme S2.** Schematic representation of the Rh catalyzed hydroboration reaction *via* a [Rh]-B migratory insertion mechanism.

This mechanism is computed to be possible for the pro-*S* profile, as shown in Figure S3. The pro-*S* [Rh]-H vs. [Rh]-B migration insertion mechanism profiles are energetically almost equivalent and they possibly coexist (Figure S3). In Figure S4, the structures of **III<sub>S</sub>**, **III<sub>BS</sub>**, **III<sub>R</sub>** and **III<sub>BR</sub>** are compared. In the **III<sub>BS</sub>** intermediate, the H<sub>a</sub>-Rh bond is orthogonal to the P(1)-P(2)-Rh plane. The -BH<sub>2</sub> fragment also moves from this plane, so that a further interaction is formed between H<sub>b</sub> and the metal center that contributes to stabilize the complex. A structure results, where the H<sub>a</sub>, the Rh and the H<sub>b</sub> atoms are collinear.

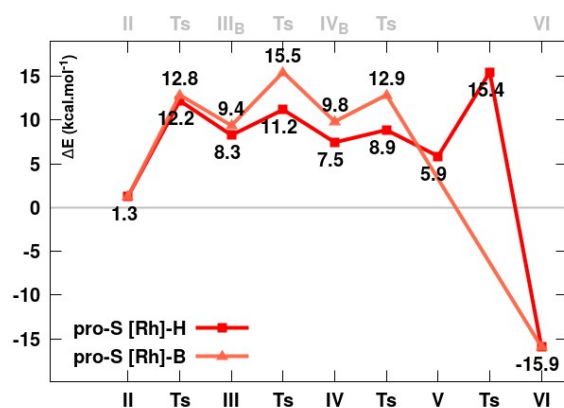

**Figure S3.** Comparison between the pro-*S* mechanisms, *via* either the [Rh]-H migratory insertion mechanism (red) or the [Rh]-B migratory insertion mechanism (pink). Labels are as in Figure 1 (main article, [Rh]-H migratory insertion mechanism, on the x axis) and Scheme S2 ([Rh]-B migratory insertion mechanism, on the opposite x axis). Energies (electronic energies, ZPE corrected) are related to the isolated [(L)Rh-NBD]<sup>+</sup> (L=*S*-MeO-xylyl-BIPHEP) complex and substrate **1**.

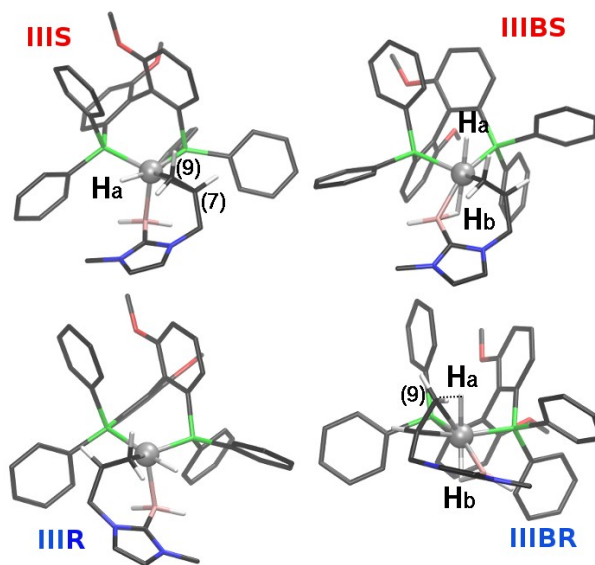

**Figure S4.** Computed structures of intermediates **III<sub>S</sub>**, **III<sub>BS</sub>**, **III<sub>R</sub>** and **III<sub>BR</sub>** (PBE-D3/def2-SVP level).

We could not optimize structures for the pro-*R* [Rh]-B migratory insertion mechanism. Indeed, any attempt to obtain a valid **III<sub>BR</sub>** intermediate lead us to either **III<sub>R</sub>** or to the structure presented in Figure S4. The latter is higher in energy than all the transition states of the pro-*R* [Rh]-H migratory insertion mechanism; furthermore, the hydride H<sub>a</sub> is very close to the C(9) atom (121 pm), which would indeed favor the [Rh]-H than the [Rh]-B migratory insertion.

## 4. Substitution of the *R* product

### 4.1. Alkene approach

We report here (Figure S5) results obtained for the substitution of the final *R* product by prior coordination of the alkene moiety of the new substrate, which is intrinsically enantioselective and is possible for the pro-*S* approach, while the pro-*R* implies a large approaching barrier (18.7 kcal/mol). The first transition state corresponds to the approach of the alkene moiety to the metal center. Some conformational changes take place, for which the transition states have not been searched. The second transition state determines the final expulsion of the product.

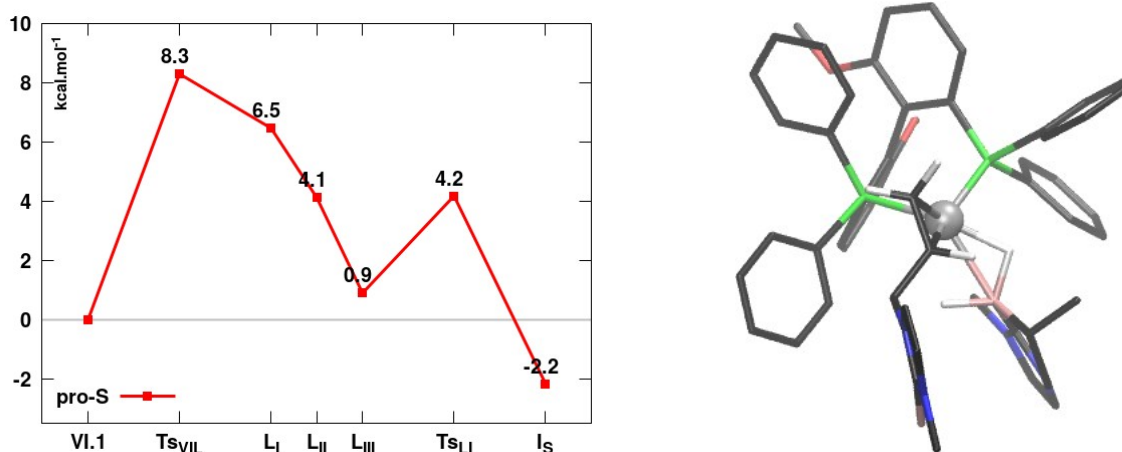

**Fig. S5** Computed pathway (electronic energies corrected by the ZPE) for the substitution of the final *R* product by a new substrate, pro-*S* approach. The **L<sub>I</sub>** structure is also depicted.

### 4.2. BH<sub>3</sub> Approach

The last step of the BH<sub>3</sub> approach is the removal of the product and the coordination of the alkene moiety. The structures of the corresponding transition states are shown in the main article. The **TS<sub>VII-IS</sub>** has a closer structure to the intermediate **VIIc** concerning the orientation of the NHC group, while in **TS<sub>VII-IR</sub>**, the NHC fragment needs to undergo a rotation about the C-B bond to reach the best conformation for the alkene approach to the metal center. This is revealed by the values of the Rh-B-C-N dihedral angles, which are of 78° and of 63° for **VIIc** and **TS<sub>VII-IS</sub>**, respectively, while its value is of 3.5° for **TS<sub>VII-IR</sub>**.

## 5. Energies and xyz coordinates

Energies. Total energies and ZPE (in a.u.) for computed structures at the optimizing level (def2-TZVP/PBE-D3) and at the def2-QZVP/RPA(PBE) level are reported. Cartesian coordinates of all intermediates and transition states at the optimizing level follow. See the article for labels, R for pro-R structures, S for pro-S structures.

|                             | PBE-D3 (a.u.)   | ZPE (a.u.) | Chemical Potential (kJ/mol) | RPA (a.u.)       |
|-----------------------------|-----------------|------------|-----------------------------|------------------|
| <b>0</b>                    | -2817.819224300 | 0.7671902  | 1762.09                     | -2820.1290840594 |
| <b>TS<sub>0-IR</sub></b>    | -2817.809595906 | 0.7667683  | 1763.22                     | -2820.1179360517 |
| <b>TS<sub>0-IIR</sub></b>   | -2817.816094756 | 0.7671041  | 1764.29                     | -2820.1267263527 |
| <b>I<sub>R</sub></b>        | -2817.840231936 | 0.7691105  | 1781.02                     | -2820.1502164133 |
| <b>TS<sub>I-IIR</sub></b>   | -2817.826371612 | 0.7690246  | 1782.34                     | -2820.1358488962 |
| <b>II<sub>R</sub></b>       | -2817.834022961 | 0.7686395  | 1775.37                     | -2820.1430670865 |
| <b>TS<sub>II-IIR</sub></b>  | -2817.814902887 | 0.767174   | 1773.8                      | -2820.1244815121 |
| <b>III<sub>R</sub></b>      | -2817.814997231 | 0.7675123  | 1767.39                     | -2820.1254425507 |
| <b>TS<sub>III-IVR</sub></b> | -2817.80776245  | 0.7659951  | 1769.3                      | -2820.1173665672 |
| <b>IV<sub>R</sub></b>       | -2817.822143244 | 0.7690815  | 1776.16                     | -2820.1324004661 |
| <b>TS<sub>IV-VR</sub></b>   | -2817.821604328 | 0.7685437  | 1776.08                     | -2820.130212813  |
| <b>V<sub>R</sub></b>        | -2817.828048253 | 0.7699276  | 1779.18                     | -2820.1388822925 |
| <b>TS<sub>V-VIR</sub></b>   | -2817.81167643  | 0.7682014  | 1772.5                      | -2820.1197375168 |
| <b>VI<sub>R</sub></b>       | -2817.853890877 | 0.7703957  | 1773.28                     | -2820.1631096595 |
| <b>III<sub>BR</sub></b>     | -2817.806229631 | 0.7672569  | 1775.48                     | -2820.1145148406 |
| <b>TS<sub>0-IS</sub></b>    | -2817.813326731 | 0.767274   | 1771.95                     | -2820.1229271136 |
| <b>TS<sub>0-IIS</sub></b>   | -2817.806689203 | 0.7669511  | 1765.14                     | -2820.1154432734 |
| <b>I<sub>S</sub></b>        | -2817.830160454 | 0.7686507  | 1778.67                     | -2820.1379558464 |
| <b>TS<sub>I-IIS</sub></b>   | -2817.81366756  | 0.7677426  | 1773.05                     | -2820.1207952961 |
| <b>II<sub>S</sub></b>       | -2817.825872054 | 0.7688716  | 1777.86                     | -2820.1351529934 |
| <b>TS<sub>II-IIS</sub></b>  | -2817.80662667  | 0.7662998  | 1769.67                     | -2820.1147686169 |
| <b>III<sub>S</sub></b>      | -2817.812577848 | 0.767413   | 1774.06                     | -2820.1213648723 |
| <b>TS<sub>III-IVS</sub></b> | -2817.807631559 | 0.7659254  | 1771.86                     | -2820.1153692449 |
| <b>IV<sub>S</sub></b>       | -2817.816724416 | 0.7694001  | 1778.04                     | -2820.1251895569 |
| <b>TS<sub>IV-VS</sub></b>   | -2817.815582085 | 0.7695491  | 1782.04                     | -2820.1231045517 |

|                                       |                 |           |         |                  |
|---------------------------------------|-----------------|-----------|---------|------------------|
| <b>V<sub>S</sub></b>                  | -2817.818912203 | 0.7694912 | 1773.76 | -2820.1277841884 |
| <b>T<sub>S<sub>V</sub>_VIS</sub></b>  | -2817.803423396 | 0.7685371 | 1771.49 | -2820.1116805098 |
| <b>V<sub>I<sub>S</sub></sub></b>      | -2817.854979644 | 0.7702485 | 1769.98 | -2820.1637318762 |
| <b>VIR.1</b>                          | -3226.384437318 | 0.9592599 | 2216.68 | -3229.3490145167 |
| <b>VIIa</b>                           | -3226.385457261 | 0.9587476 | 2223.54 | -3229.3480557458 |
| <b>VIIb</b>                           | -3226.386176385 | 0.9605426 | 2230.07 | -3229.353969072  |
| <b>VIIc</b>                           | -3226.392656199 | 0.9602854 | 2234.06 | -3229.3613724941 |
| <b>T<sub>S<sub>VII</sub>_IS</sub></b> | -3226.367425658 | 0.95909   | 2224.29 | -3229.3324844031 |
| <b>T<sub>S<sub>VII</sub>_IR</sub></b> | -3226.365402536 | 0.9581649 | 2216.17 | -3229.3287989484 |

## XYZ Coordinates

0.xyz

98

Energy = -2817.819224300

|    |            |            |            |
|----|------------|------------|------------|
| Rh | -1.5938724 | -0.1452963 | -0.3693164 |
| P  | -0.3316567 | -1.4524822 | 0.8909634  |
| P  | 0.1853009  | 0.6200425  | -1.4343583 |
| C  | -0.4314179 | 1.5149098  | -2.9203558 |
| C  | -0.0511416 | 2.8297486  | -3.2284605 |
| C  | -1.4013190 | 0.8823239  | -3.7208812 |
| C  | -0.6207370 | 3.4921907  | -4.3193238 |
| H  | 0.6851864  | 3.3480234  | -2.6144082 |
| C  | -1.9547555 | 1.5402185  | -4.8174836 |
| H  | -1.7378388 | -0.1250777 | -3.4661240 |
| C  | -1.5672496 | 2.8498384  | -5.1183394 |
| H  | -0.3197757 | 4.5171395  | -4.5421709 |
| H  | -2.6992569 | 1.0326793  | -5.4328540 |
| H  | -2.0083083 | 3.3690405  | -5.9706166 |
| C  | 1.2972599  | -0.7133910 | -2.0302731 |
| C  | 2.1158364  | -1.3805097 | -1.0962954 |
| C  | 1.1997144  | -1.1764687 | -3.3509665 |
| C  | 2.8028868  | -2.5468797 | -1.5138379 |
| C  | 1.8968663  | -2.3168477 | -3.7406896 |
| H  | 0.5858132  | -0.6446576 | -4.0759221 |
| C  | 2.6853202  | -3.0152293 | -2.8286736 |
| H  | 1.8222839  | -2.6724347 | -4.7695023 |
| H  | 3.2118677  | -3.9132150 | -3.1469113 |
| C  | 1.2947435  | 1.8310965  | -0.6194204 |
| C  | 2.5062549  | 2.2094784  | -1.2205410 |
| C  | 0.9147774  | 2.4183710  | 0.5946655  |
| C  | 3.3132591  | 3.1748795  | -0.6184473 |
| H  | 2.8236925  | 1.7369875  | -2.1520359 |
| C  | 1.7285735  | 3.3775633  | 1.1998612  |
| H  | -0.0145522 | 2.0924312  | 1.0695754  |
| C  | 2.9259565  | 3.7609350  | 0.5907327  |
| H  | 4.2509814  | 3.4684721  | -1.0936219 |
| H  | 1.4318001  | 3.8202713  | 2.1521933  |
| H  | 3.5624402  | 4.5117898  | 1.0617490  |
| C  | -0.1459389 | -3.1691584 | 0.2863590  |
| C  | 0.7596995  | -4.0529918 | 0.8951481  |
| C  | -0.9154182 | -3.6031384 | -0.8026605 |
| C  | 0.8821962  | -5.3594106 | 0.4216808  |
| H  | 1.3809233  | -3.7139930 | 1.7261274  |
| C  | -0.7809030 | -4.9074902 | -1.2794381 |
| H  | -1.6025467 | -2.8996165 | -1.2799088 |
| C  | 0.1159396  | -5.7865938 | -0.6670495 |
| H  | 1.5842591  | -6.0443477 | 0.9004661  |
| H  | -1.3747053 | -5.2369530 | -2.1333894 |
| H  | 0.2194144  | -6.8073221 | -1.0391640 |
| C  | -1.2008009 | -1.5756612 | 2.5066901  |
| C  | -1.5184545 | -0.3819968 | 3.1815651  |

|   |            |            |            |
|---|------------|------------|------------|
| C | -1.6006890 | -2.7991577 | 3.0613412  |
| C | -2.1872473 | -0.4167029 | 4.4041663  |
| H | -1.2384366 | 0.5768199  | 2.7386602  |
| C | -2.2926359 | -2.8284659 | 4.2761304  |
| H | -1.3738895 | -3.7328146 | 2.5454319  |
| C | -2.5785166 | -1.6421598 | 4.9542158  |
| H | -2.4083390 | 0.5162221  | 4.9264144  |
| H | -2.6015753 | -3.7869351 | 4.6962751  |
| H | -3.1065893 | -1.6711066 | 5.9086957  |
| C | 1.3857993  | -0.9615161 | 1.3236830  |
| C | 1.7115183  | -0.5610198 | 2.6290887  |
| C | 2.3493540  | -0.8966708 | 0.2976954  |
| C | 2.9861425  | -0.0789196 | 2.9137282  |
| H | 0.9754164  | -0.6347830 | 3.4270726  |
| C | 3.6313089  | -0.3787603 | 0.6073059  |
| C | 3.9454690  | 0.0288908  | 1.9098059  |
| H | 3.2369258  | 0.2224320  | 3.9320137  |
| H | 4.9321975  | 0.4237261  | 2.1452565  |
| O | 4.4934429  | -0.2908475 | -0.4396356 |
| O | 3.5500008  | -3.1586835 | -0.5573091 |
| C | 5.8047040  | 0.2166264  | -0.1931954 |
| H | 6.3167886  | 0.1938072  | -1.1612502 |
| H | 5.7686043  | 1.2537886  | 0.1790304  |
| H | 6.3512021  | -0.4149379 | 0.5257454  |
| C | 4.2463185  | -4.3544789 | -0.9078101 |
| H | 4.7657599  | -4.6710791 | 0.0032689  |
| H | 3.5461827  | -5.1447842 | -1.2244589 |
| H | 4.9846665  | -4.1710451 | -1.7051413 |
| C | -4.3774478 | 2.3900564  | 2.7526196  |
| C | -3.7439119 | 3.3334448  | 1.9974966  |
| C | -3.8864965 | 1.4544676  | 0.7654576  |
| N | -4.4646970 | 1.2488501  | 1.9767282  |
| H | -4.7807520 | 2.4393251  | 3.7567897  |
| H | -3.4808964 | 4.3608535  | 2.2158381  |
| N | -3.4625146 | 2.7466797  | 0.7759941  |
| C | -2.7345185 | 3.3884034  | -0.3383092 |
| H | -3.2296830 | 3.0738762  | -1.2690346 |
| H | -1.7140198 | 2.9789168  | -0.3600272 |
| C | -2.7087955 | 4.8812306  | -0.2360115 |
| H | -3.6752230 | 5.3947198  | -0.2736985 |
| C | -1.5751594 | 5.5826873  | -0.1605129 |
| H | -0.6010780 | 5.0871997  | -0.1295529 |
| H | -1.5804038 | 6.6730418  | -0.1409727 |
| C | -5.0732739 | -0.0147663 | 2.3764802  |
| B | -3.7366972 | 0.3541187  | -0.3704202 |
| H | -4.7900189 | 0.0462125  | -0.8849731 |
| H | -2.9422673 | 0.7313077  | -1.3055930 |
| H | -3.2675521 | -0.7530652 | 0.1320764  |
| H | -4.3044286 | -0.7942913 | 2.4545326  |
| H | -5.5541202 | 0.1166944  | 3.3511384  |
| H | -5.8225263 | -0.3146754 | 1.6333930  |

|                          |            |            |            |   |            |            |            |
|--------------------------|------------|------------|------------|---|------------|------------|------------|
| IR.xyz                   |            |            |            | H | 1.8937737  | 2.1012330  | 1.9562865  |
| 98                       |            |            |            | C | 0.9727362  | 5.6223739  | 0.6158785  |
| Energy = -2817.840231936 |            |            |            | H | -0.4779935 | 4.6245731  | -0.6221767 |
| Rh                       | 1.4572895  | 0.2791632  | -0.5586963 | C | 1.9592102  | 5.4879302  | 1.5926254  |
| P                        | -0.1964442 | 1.6867258  | -0.0076347 | H | 3.0557623  | 4.1011758  | 2.8398042  |
| P                        | -0.0379773 | -1.4874953 | -0.5390375 | H | 0.7284625  | 6.6074122  | 0.2151591  |
| C                        | 0.6420543  | -2.7014145 | -1.7384680 | H | 2.4866993  | 6.3676251  | 1.9645065  |
| C                        | 0.9133081  | -4.0330412 | -1.3980448 | C | -1.2284085 | 1.0243488  | 1.3668020  |
| C                        | 0.9855621  | -2.2422775 | -3.0233357 | C | -0.9733734 | 1.4081016  | 2.6925906  |
| C                        | 1.5046664  | -4.8914151 | -2.3295020 | C | -2.2133982 | 0.0554710  | 1.0822296  |
| H                        | 0.6733174  | -4.4040813 | -0.4017302 | C | -1.6835822 | 0.8231666  | 3.7374453  |
| C                        | 1.5611571  | -3.1045729 | -3.9543901 | H | -0.2378483 | 2.1790956  | 2.9118058  |
| H                        | 0.8043303  | -1.1980291 | -3.2872052 | C | -2.9137284 | -0.5336894 | 2.1652671  |
| C                        | 1.8245287  | -4.4337442 | -3.6080131 | C | -2.6448117 | -0.1523845 | 3.4856656  |
| H                        | 1.7140376  | -5.9251860 | -2.0497315 | H | -1.4867184 | 1.1322044  | 4.7652238  |
| H                        | 1.8109961  | -2.7377323 | -4.9514428 | H | -3.1823800 | -0.6085149 | 4.3149988  |
| H                        | 2.2821973  | -5.1081503 | -4.3334031 | O | -3.8247164 | -1.4809366 | 1.8253107  |
| C                        | -1.7486172 | -1.1437076 | -1.1201494 | O | -4.6170501 | 0.7623830  | 0.0482404  |
| C                        | -2.5896955 | -0.3686387 | -0.2981681 | C | -4.5494258 | -2.1286373 | 2.8703295  |
| C                        | -2.1905803 | -1.5776496 | -2.3788692 | H | -5.2103407 | -2.8448120 | 2.3700207  |
| C                        | -3.8751157 | -0.0191725 | -0.7796603 | H | -3.8703929 | -2.6698751 | 3.5492348  |
| C                        | -3.4651286 | -1.2353756 | -2.8240907 | H | -5.1558910 | -1.4094792 | 3.4443577  |
| H                        | -1.5481364 | -2.1952629 | -3.0040984 | C | -5.9248920 | 1.1427840  | -0.3771410 |
| C                        | -4.3082847 | -0.4519926 | -2.0391230 | H | -6.3333214 | 1.7547641  | 0.4344762  |
| H                        | -3.8090934 | -1.5832949 | -3.7994906 | H | -5.8853280 | 1.7402157  | -1.3028711 |
| H                        | -5.2961386 | -0.1833935 | -2.4089680 | H | -6.5687137 | 0.2619048  | -0.5321698 |
| C                        | -0.3583710 | -2.4582676 | 0.9892436  | C | 6.7481622  | 0.1799625  | 0.8938857  |
| C                        | -1.3440461 | -3.4601061 | 0.9803677  | C | 6.3875516  | 0.9659275  | -0.1609175 |
| C                        | 0.3494353  | -2.2034059 | 2.1701410  | C | 4.6376001  | -0.3648033 | 0.3242131  |
| C                        | -1.5978907 | -4.2064317 | 2.1307943  | N | 5.6641212  | -0.6355497 | 1.1728460  |
| H                        | -1.9238325 | -3.6470195 | 0.0746073  | H | 7.6704530  | 0.1312052  | 1.4603274  |
| C                        | 0.0828606  | -2.9419158 | 3.3240435  | H | 6.9403846  | 1.7251469  | -0.7013777 |
| H                        | 1.0996065  | -1.4138444 | 2.1869943  | N | 5.0920364  | 0.6192760  | -0.4914919 |
| C                        | -0.8860976 | -3.9475893 | 3.3058637  | C | 4.3126163  | 1.1540843  | -1.6179376 |
| H                        | -2.3611166 | -4.9863466 | 2.1114290  | H | 4.1792077  | 0.3485710  | -2.3565309 |
| H                        | 0.6307258  | -2.7263810 | 4.2429357  | H | 4.9454801  | 1.9282457  | -2.0802847 |
| H                        | -1.0897816 | -4.5282459 | 4.2073165  | C | 2.9768111  | 1.7330472  | -1.2240515 |
| C                        | -1.4438349 | 2.2791534  | -1.2153707 | H | 3.0331004  | 2.5841742  | -0.5391822 |
| C                        | -2.4922301 | 3.1019889  | -0.7690321 | C | 1.9025799  | 1.6827542  | -2.1444237 |
| C                        | -1.3792222 | 1.9202411  | -2.5678038 | H | 2.0136193  | 1.1222666  | -3.0789195 |
| C                        | -3.4403985 | 3.5802211  | -1.6729062 | H | 1.2237661  | 2.5333781  | -2.2201086 |
| H                        | -2.5750638 | 3.3569042  | 0.2891168  | C | 5.6138627  | -1.6050045 | 2.2606885  |
| C                        | -2.3369940 | 2.3897697  | -3.4666044 | B | 3.1922690  | -0.9951729 | 0.2867569  |
| H                        | -0.5939227 | 1.2424649  | -2.9032844 | H | 3.1381118  | -2.1408900 | 0.6675854  |
| C                        | -3.3633512 | 3.2270215  | -3.0231468 | H | 2.4231503  | -0.2674350 | 1.0095989  |
| H                        | -4.2465979 | 4.2248568  | -1.3186519 | H | 2.7866676  | -0.9832576 | -0.9345122 |
| H                        | -2.2862707 | 2.0926066  | -4.5151003 | H | 4.8076233  | -2.3172398 | 2.0585604  |
| H                        | -4.1083361 | 3.5990103  | -3.7284630 | H | 6.5706020  | -2.1375846 | 2.3184820  |
| C                        | 0.5886603  | 3.2225875  | 0.6393381  | H | 5.4195158  | -1.0980551 | 3.2157968  |
| C                        | 1.6086316  | 3.0940612  | 1.6021919  |   |            |            |            |
| C                        | 0.2884956  | 4.4989797  | 0.1422667  |   |            |            |            |
| C                        | 2.2770875  | 4.2179447  | 2.0840630  |   |            |            |            |



|                          |            |            |            |  |  |
|--------------------------|------------|------------|------------|--|--|
| IIR.xyz                  |            |            |            |  |  |
| 98                       |            |            |            |  |  |
| Energy = -2817.834022961 |            |            |            |  |  |
| Rh                       | -1.3790477 | 0.6106062  | -0.0366178 |  |  |
| H                        | -3.4229413 | -1.5247073 | -1.3304781 |  |  |
| B                        | -3.3310921 | -0.3750701 | -0.9738112 |  |  |
| H                        | -2.7315526 | -0.4813373 | 0.1810673  |  |  |
| H                        | -2.7114717 | 0.3452133  | -1.7671916 |  |  |
| C                        | -4.6912251 | 0.2633903  | -0.5064283 |  |  |
| C                        | -6.1600609 | 1.7694918  | 0.2978193  |  |  |
| C                        | -6.7529552 | 0.5413458  | 0.3528177  |  |  |
| H                        | -6.5292923 | 2.7486783  | 0.5782589  |  |  |
| H                        | -7.7379151 | 0.2458509  | 0.6937530  |  |  |
| N                        | -4.8970632 | 1.5766626  | -0.2298991 |  |  |
| N                        | -5.8371673 | -0.3692190 | -0.1432273 |  |  |
| C                        | -3.9046559 | 2.6195025  | -0.4881017 |  |  |
| H                        | -3.7114473 | 2.6516728  | -1.5715963 |  |  |
| H                        | -4.3831401 | 3.5751526  | -0.2191364 |  |  |
| C                        | -2.6014137 | 2.4855919  | 0.2671979  |  |  |
| H                        | -1.9566715 | 3.3401980  | 0.0558448  |  |  |
| C                        | -2.3953242 | 1.8000107  | 1.4724199  |  |  |
| H                        | -3.1898907 | 1.1849167  | 1.9044096  |  |  |
| H                        | -1.6711905 | 2.1852941  | 2.1902702  |  |  |
| C                        | -6.0325423 | -1.8157150 | -0.2050027 |  |  |
| H                        | -5.8444137 | -2.1752032 | -1.2228167 |  |  |
| H                        | -5.3404435 | -2.3197703 | 0.4828599  |  |  |
| H                        | -7.0657509 | -2.0410751 | 0.0795043  |  |  |
| P                        | 0.5967201  | 1.7386950  | -0.0753291 |  |  |
| P                        | -0.2852243 | -1.4190567 | 0.1298711  |  |  |
| C                        | 1.8183143  | 0.9160349  | -1.1919707 |  |  |
| C                        | 2.4858854  | -0.2448510 | -0.7514358 |  |  |
| C                        | 2.0095516  | 1.3815058  | -2.5028167 |  |  |
| C                        | 3.3270804  | -0.9323967 | -1.6620741 |  |  |
| C                        | 2.8443446  | 0.6917843  | -3.3775020 |  |  |
| H                        | 1.5251325  | 2.2946031  | -2.8409615 |  |  |
| C                        | 3.4981108  | -0.4686477 | -2.9717661 |  |  |
| H                        | 2.9903944  | 1.0652328  | -4.3922769 |  |  |
| H                        | 4.1406266  | -1.0008646 | -3.6708167 |  |  |
| C                        | 1.2490701  | -1.4226172 | 1.1431134  |  |  |
| C                        | 2.3953143  | -0.7792284 | 0.6383313  |  |  |
| C                        | 1.2581484  | -1.9748809 | 2.4334998  |  |  |
| C                        | 3.5420428  | -0.6852136 | 1.4644651  |  |  |
| C                        | 2.4005354  | -1.8789734 | 3.2238622  |  |  |
| H                        | 0.3809832  | -2.4925569 | 2.8171331  |  |  |
| C                        | 3.5403653  | -1.2299778 | 2.7543877  |  |  |
| H                        | 2.4051548  | -2.3172899 | 4.2231690  |  |  |
| H                        | 4.4201261  | -1.1539945 | 3.3908719  |  |  |
| C                        | 0.2028764  | -2.2989494 | -1.4005001 |  |  |
| C                        | 1.0305081  | -3.4325290 | -1.3439303 |  |  |
| C                        | -0.2635357 | -1.8442985 | -2.6411891 |  |  |
| C                        | 1.3757383  | -4.1042968 | -2.5164580 |  |  |
| H                        | 1.4161183  | -3.7797218 | -0.3836909 |  |  |
| C                        | 0.0943206  | -2.5121156 | -3.8132027 |  |  |
| H                        | -0.9051307 | -0.9625278 | -2.6849375 |  |  |
| C                        | 0.9121538  | -3.6429483 | -3.7523764 |  |  |
| H                        | 2.0135376  | -4.9885748 | -2.4651617 |  |  |
| H                        | -0.2653184 | -2.1469402 | -4.7764284 |  |  |
| H                        | 1.1890027  | -4.1666064 | -4.6690098 |  |  |
| C                        | -1.4214269 | -2.5854765 | 0.9936710  |  |  |
| C                        | -2.0328998 | -2.1594312 | 2.1871229  |  |  |
| C                        | -1.7855640 | -3.8235586 | 0.4504191  |  |  |
| C                        | -2.9720115 | -2.9631590 | 2.8307442  |  |  |
| H                        | -1.7791263 | -1.1812812 | 2.6019227  |  |  |
| C                        | -2.7397622 | -4.6218365 | 1.0897659  |  |  |
| H                        | -1.3392530 | -4.1650435 | -0.4835088 |  |  |
| C                        | -3.3325489 | -4.1978995 | 2.2795018  |  |  |
| H                        | -3.4276269 | -2.6239882 | 3.7628479  |  |  |
| H                        | -3.0169541 | -5.5819242 | 0.6511184  |  |  |
| H                        | -4.0717135 | -4.8263964 | 2.7790890  |  |  |
| C                        | 0.3460145  | 3.4045199  | -0.8255968 |  |  |
| C                        | 0.7699854  | 4.5967245  | -0.2237614 |  |  |
| C                        | -0.4035172 | 3.4769963  | -2.0165628 |  |  |
| C                        | 0.4737361  | 5.8310702  | -0.8116846 |  |  |
| H                        | 1.3252610  | 4.5717374  | 0.7136822  |  |  |
| C                        | -0.6848735 | 4.7067609  | -2.6077138 |  |  |
| H                        | -0.7872914 | 2.5588628  | -2.4685973 |  |  |
| C                        | -0.2438610 | 5.8903224  | -2.0059758 |  |  |
| H                        | 0.8086198  | 6.7498402  | -0.3275413 |  |  |
| H                        | -1.2551772 | 4.7430089  | -3.5375808 |  |  |
| H                        | -0.4680353 | 6.8546699  | -2.4644241 |  |  |
| C                        | 1.5570989  | 2.0542387  | 1.4527163  |  |  |
| C                        | 1.0386430  | 1.6863473  | 2.7011663  |  |  |
| C                        | 2.8241338  | 2.6578874  | 1.3820644  |  |  |
| C                        | 1.7636325  | 1.9368910  | 3.8666825  |  |  |
| H                        | 0.0836473  | 1.1612368  | 2.7462284  |  |  |
| C                        | 3.5417531  | 2.9159492  | 2.5496001  |  |  |
| H                        | 3.2558203  | 2.9103892  | 0.4118398  |  |  |
| C                        | 3.0110937  | 2.5605971  | 3.7934983  |  |  |
| H                        | 1.3576032  | 1.6346324  | 4.8331828  |  |  |
| H                        | 4.5235413  | 3.3886164  | 2.4867987  |  |  |
| H                        | 3.5750682  | 2.7633117  | 4.7055074  |  |  |
| O                        | 3.9196660  | -2.0543587 | -1.1760500 |  |  |
| O                        | 4.6003443  | -0.0279653 | 0.9216515  |  |  |
| C                        | 4.7842350  | -2.7895414 | -2.0416104 |  |  |
| H                        | 5.1466765  | -3.6353277 | -1.4471197 |  |  |
| H                        | 4.2397889  | -3.1671029 | -2.9225719 |  |  |
| H                        | 5.6402925  | -2.1771656 | -2.3681939 |  |  |
| C                        | 5.7916429  | 0.0881830  | 1.6987845  |  |  |
| H                        | 6.2078567  | -0.9019715 | 1.9456046  |  |  |
| H                        | 6.5020578  | 0.6360829  | 1.0701458  |  |  |
| H                        | 5.6091513  | 0.6552717  | 2.6263514  |  |  |

IIIR.xyz

98

Energy = -2817.814997231

Rh -1.3758120 0.4220249 0.6346224  
H -2.2991446 0.8703910 -1.7969673  
H -2.5633329 -0.4889008 1.1022825  
B -2.8858701 0.1773150 -0.9888745  
H -3.0578438 -0.9732220 -1.3192397  
C -6.3245719 1.3274854 0.1213883  
C -5.5877159 2.4595319 0.3242477  
H -7.3778906 1.1309196 0.2819201  
H -5.8725672 3.4303240 0.7121927  
C -4.2037238 0.8790048 -0.4988227  
N -4.2977756 2.1679950 -0.0687787  
N -5.4592766 0.3685293 -0.3731698  
C -2.1692721 2.4817065 1.1437303  
C -2.5403846 1.5376921 2.1023960  
H -3.5704421 1.1907687 2.1800754  
H -1.9584689 1.4420225 3.0232553  
H -1.3205329 3.1403089 1.3369671  
P -0.5130716 -1.6580491 0.2423198  
P 0.5851947 1.6074462 -0.1660288  
C 0.9917249 -1.6132690 1.3074882  
C 2.1480902 -0.9332757 0.8623313  
C 0.9142431 -2.0898245 2.6267891  
C 3.2025585 -0.7267501 1.7880026  
C 1.9693755 -1.8831973 3.5105564  
H 0.0345399 -2.6377843 2.9595088  
C 3.1085242 -1.1916208 3.1058477  
H 1.9048493 -2.2651914 4.5306565  
H 3.9210384 -1.0269094 3.8113132  
C 1.8459454 0.6753039 -1.1219763  
C 2.2405391 1.0871019 -2.4041375  
C 2.3986378 -0.4839947 -0.5439508  
C 3.1671814 0.3390167 -3.1239643  
H 1.8347862 1.9984848 -2.8385099  
C 3.3394852 -1.2283192 -1.2983681  
C 3.7122658 -0.8238190 -2.5853273  
H 3.4707421 0.6648294 -4.1200750  
H 4.4281032 -1.4042693 -3.1644425  
C -3.1247105 3.0227057 0.1005096  
H -3.4847755 4.0217005 0.3917782  
H -2.6195738 3.1265856 -0.8711896  
C -5.8391968 -0.9961437 -0.7260606  
H -5.9971597 -1.0842751 -1.8087893  
H -5.0407786 -1.6828950 -0.4248095  
H -6.7654683 -1.2504699 -0.1990918  
C 0.0726524 -2.2725029 -1.3781981  
C 0.9065397 -3.4032404 -1.4241137  
C -0.3295810 -1.6604623 -2.5716843  
C 1.3201518 -3.9171187 -2.6522549  
H 1.2447289 -3.8711865 -0.4979027

C 0.0989207 -2.1715918 -3.7980972  
H -0.9786992 -0.7858331 -2.5366882  
C 0.9186940 -3.3011939 -3.8412908  
H 1.9610134 -4.8001674 -2.6801944  
H -0.2114053 -1.6848502 -4.7240241  
H 1.2470239 -3.7019463 -4.8017001  
C -1.5823967 -3.0300480 0.8635755  
C -2.2714398 -2.8664341 2.0794433  
C -1.7842062 -4.2105788 0.1343931  
C -3.1076853 -3.8689776 2.5678233  
H -2.1654785 -1.9361124 2.6401769  
C -2.6395045 -5.2063548 0.6158802  
H -1.2886518 -4.3573053 -0.8241794  
C -3.2958409 -5.0448615 1.8354689  
H -3.6212777 -3.7268663 3.5202160  
H -2.7903441 -6.1125856 0.0270765  
H -3.9579056 -5.8262617 2.2118069  
C 0.1420079 3.0476061 -1.2092518  
C 0.2501251 4.3657672 -0.7375702  
C -0.4770699 2.8231709 -2.4537271  
C -0.2416454 5.4324816 -1.4945184  
H 0.7250234 4.5649626 0.2240239  
C -0.9556098 3.8922374 -3.2117996  
H -0.5897057 1.8064782 -2.8312111  
C -0.8428265 5.2006620 -2.7331554  
H -0.1446665 6.4508203 -1.1143813  
H -1.4236800 3.6995771 -4.1785171  
H -1.2194311 6.0357916 -3.3255809  
C 1.5977917 2.3079450 1.1968884  
C 2.8023375 2.9766531 0.9229782  
C 1.1974318 2.1375789 2.5286737  
C 3.5726907 3.4895409 1.9655888  
H 3.1408637 3.0866738 -0.1090824  
C 1.9744632 2.6423496 3.5732831  
H 0.2869578 1.5774397 2.7511636  
C 3.1591306 3.3255103 3.2919543  
H 4.5041886 4.0129705 1.7435197  
H 1.6569104 2.4950429 4.6066333  
H 3.7656764 3.7258425 4.1061095  
O 4.2787667 -0.0536867 1.3030392  
O 3.8231242 -2.3440394 -0.6888370  
C 5.3709750 0.2047535 2.1848825  
H 6.1070316 0.7536467 1.5874784  
H 5.0564441 0.8278760 3.0376781  
H 5.8215831 -0.7315093 2.5522073  
C 4.7987564 -3.1210890 -1.3825573  
H 5.0506041 -3.9481660 -0.7098722  
H 4.3931607 -3.5248155 -2.3247763  
H 5.7048179 -2.5306069 -1.5944015

|                          |            |            |            |   |                                  |
|--------------------------|------------|------------|------------|---|----------------------------------|
| IVR.xyz                  |            |            |            |   |                                  |
| 98                       |            |            |            |   |                                  |
| Energy = -2817.822143244 |            |            |            |   |                                  |
| Rh                       | -1.0698878 | -0.8045117 | 1.0044425  | C | 1.4864442 -2.7364385 -3.5032001  |
| H                        | -1.7773939 | -1.1508419 | -1.7239414 | H | -0.1310424 -2.2713760 -2.1479928 |
| H                        | -1.5494330 | -2.4697611 | 1.9772614  | C | 2.8701983 -2.8266720 -3.6673908  |
| B                        | -2.1598960 | -1.6163203 | -0.6635198 | H | 4.8015931 -2.5946334 -2.7202411  |
| H                        | -1.8371618 | -2.7914176 | -0.5298804 | H | 0.8207584 -2.9724199 -4.3351779  |
| C                        | -5.8934421 | -1.7346400 | -1.2085742 | H | 3.2888505 -3.1378535 -4.6260745  |
| C                        | -5.8890260 | -1.1162241 | 0.0051476  | C | 1.4578013 -3.0252006 1.4818194   |
| H                        | -6.7135449 | -2.0466894 | -1.8443404 | C | 1.0814405 -2.9823779 2.8379215   |
| H                        | -6.7043210 | -0.7641576 | 0.6253966  | C | 2.0025213 -4.2127636 0.9735649   |
| C                        | -3.7411579 | -1.4822652 | -0.5701229 | C | 1.2659442 -4.0873798 3.6670526   |
| N                        | -4.5639602 | -0.9759952 | 0.3814541  | H | 0.6462754 -2.0693023 3.2535797   |
| N                        | -4.5705498 | -1.9512501 | -1.5455564 | C | 2.1725093 -5.3252794 1.8027120   |
| C                        | -2.7929492 | -0.6276770 | 2.1238526  | H | 2.2917279 -4.2763141 -0.0754479  |
| C                        | -2.5219099 | -2.0795575 | 2.4547605  | C | 1.8107291 -5.2661948 3.1487420   |
| H                        | -3.2736307 | -2.7743089 | 2.0551060  | H | 0.9812928 -4.0300733 4.7190223   |
| H                        | -2.3514220 | -2.2774192 | 3.5223086  | H | 2.5936215 -6.2431348 1.3892208   |
| H                        | -2.5736942 | 0.0507567  | 2.9633693  | H | 1.9486109 -6.1354568 3.7933944   |
| P                        | 1.1023655  | -1.5578532 | 0.4259548  | C | -0.1456091 2.3830752 1.4111544   |
| P                        | -0.8457638 | 1.2304028  | 0.1675962  | C | 0.2502342 3.6746666 1.0273165    |
| C                        | 2.2673096  | -0.2503335 | 1.0026068  | C | -0.0292406 1.9984936 2.7538803   |
| C                        | 2.3359561  | 0.9458547  | 0.2590675  | C | 0.7421028 4.5663848 1.9797100    |
| C                        | 2.9896123  | -0.3840947 | 2.1976408  | H | 0.1798981 3.9785535 -0.0184662   |
| C                        | 3.1490498  | 1.9985399  | 0.7465921  | C | 0.4796413 2.8867887 3.7019703    |
| C                        | 3.7741240  | 0.6691042  | 2.6613472  | H | -0.3254203 0.9914657 3.0559773   |
| H                        | 2.9551034  | -1.3170611 | 2.7577187  | C | 0.8611885 4.1737206 3.3163545    |
| C                        | 3.8538069  | 1.8634381  | 1.9492625  | H | 1.0383437 5.5717210 1.6754500    |
| H                        | 4.3378213  | 0.5577157  | 3.5890256  | H | 0.5800781 2.5729093 4.7418880    |
| H                        | 4.4679763  | 2.6785906  | 2.3275095  | H | 1.2520118 4.8722405 4.0579825    |
| C                        | 0.3012289  | 1.3848850  | -1.2634527 | C | -2.4286519 2.0484469 -0.3132189  |
| C                        | -0.1944011 | 1.6541175  | -2.5487252 | C | -2.9421333 3.1150100 0.4438330   |
| C                        | 1.6792892  | 1.1402949  | -1.0710593 | C | -3.2161932 1.5314080 -1.3592348  |
| C                        | 0.6609150  | 1.6524915  | -3.6466110 | C | -4.1986561 3.6544782 0.1554350   |
| H                        | -1.2450525 | 1.8905663  | -2.6956173 | H | -2.3648267 3.5286472 1.2701292   |
| C                        | 2.5300081  | 1.1550100  | -2.2060890 | C | -4.4658991 2.0782470 -1.6498203  |
| C                        | 2.0188329  | 1.3912696  | -3.4876949 | H | -2.8553286 0.6830615 -1.9393927  |
| H                        | 0.2653702  | 1.8615825  | -4.6417407 | C | -4.9641182 3.1414058 -0.8922997  |
| H                        | 2.6742320  | 1.3849640  | -4.3567092 | H | -4.5758829 4.4838185 0.7559322   |
| C                        | -4.1531342 | -0.2535067 | 1.5945292  | H | -5.0559544 1.6655371 -2.4701319  |
| H                        | -4.9435263 | -0.4508613 | 2.3408185  | H | -5.9430273 3.5669095 -1.1181767  |
| H                        | -4.1776569 | 0.8240018  | 1.3703998  | O | 3.8439791 0.9202670 -1.9530799   |
| C                        | -4.0999969 | -2.6124643 | -2.7559187 | O | 3.1752314 3.1215724 -0.0203476   |
| H                        | -3.4980093 | -1.9169189 | -3.3551631 | C | 4.0098343 4.2016197 0.3948860    |
| H                        | -3.4756824 | -3.4752265 | -2.4907167 | H | 3.8920567 4.9771956 -0.3698393   |
| H                        | -4.9657669 | -2.9475555 | -3.3367384 | H | 3.6929381 4.6004381 1.3726380    |
| C                        | 1.7951293  | -2.0303996 | -1.2050517 | H | 5.0668610 3.8943341 0.4465465    |
| C                        | 3.1872059  | -2.1180115 | -1.3749274 | C | 4.7549428 0.9238351 -3.0514324   |
| C                        | 0.9476990  | -2.3455545 | -2.2754892 | H | 5.7401890 0.7208339 -2.6176193   |
| C                        | 3.7192794  | -2.5211781 | -2.5992949 | H | 4.5060661 0.1340389 -3.7789601   |
| H                        | 3.8547639  | -1.8612309 | -0.5507031 | H | 4.7713601 1.9034483 -3.5560989   |

|                          |            |            |            |  |  |
|--------------------------|------------|------------|------------|--|--|
| VR.xyz                   |            |            |            |  |  |
| 98                       |            |            |            |  |  |
| Energy = -2817.828048253 |            |            |            |  |  |
| Rh                       | -1.3342153 | -0.1985650 | 0.7520498  |  |  |
| H                        | -2.6184471 | -1.7688119 | -1.2638597 |  |  |
| H                        | -2.5002141 | -0.1969011 | 3.5168143  |  |  |
| B                        | -2.8402072 | -0.9815146 | -0.3733348 |  |  |
| H                        | -2.6624891 | -1.4900340 | 0.8132754  |  |  |
| C                        | -6.3098120 | 0.2629873  | -1.2014420 |  |  |
| C                        | -5.9143265 | 1.2176218  | -0.3066621 |  |  |
| H                        | -7.2432764 | 0.1357609  | -1.7374049 |  |  |
| H                        | -6.4284289 | 2.0971422  | 0.0627192  |  |  |
| C                        | -4.2165224 | -0.2344693 | -0.5314898 |  |  |
| N                        | -4.6389775 | 0.8960917  | 0.0925739  |  |  |
| N                        | -5.2576907 | -0.6141618 | -1.3347379 |  |  |
| C                        | -2.7320549 | 1.0831163  | 1.7482575  |  |  |
| C                        | -3.2965222 | 0.2776867  | 2.9227681  |  |  |
| H                        | -3.9681987 | -0.5270877 | 2.5874009  |  |  |
| H                        | -3.8690216 | 0.9216996  | 3.6174365  |  |  |
| H                        | -2.1299494 | 1.9156354  | 2.1515903  |  |  |
| P                        | 0.2939586  | -1.8277417 | 0.3184919  |  |  |
| P                        | -0.1011295 | 1.5005526  | -0.0025684 |  |  |
| C                        | 1.7857165  | -1.1972710 | 1.2006191  |  |  |
| C                        | 2.5297966  | -0.1542107 | 0.6090136  |  |  |
| C                        | 2.0856085  | -1.6292965 | 2.5017902  |  |  |
| C                        | 3.5780333  | 0.4386879  | 1.3536470  |  |  |
| C                        | 3.1173765  | -1.0255930 | 3.2169620  |  |  |
| H                        | 1.5233080  | -2.4472756 | 2.9501202  |  |  |
| C                        | 3.8622474  | 0.0098528  | 2.6566128  |  |  |
| H                        | 3.3497853  | -1.3691133 | 4.2263419  |  |  |
| H                        | 4.6621953  | 0.4729964  | 3.2315182  |  |  |
| C                        | 1.2274368  | 1.0996091  | -1.2095927 |  |  |
| C                        | 1.1369381  | 1.5427371  | -2.5389834 |  |  |
| C                        | 2.3206316  | 0.3123136  | -0.7944186 |  |  |
| C                        | 2.1236457  | 1.1989443  | -3.4585190 |  |  |
| H                        | 0.3066478  | 2.1702635  | -2.8557793 |  |  |
| C                        | 3.3106513  | -0.0252015 | -1.7507855 |  |  |
| C                        | 3.2071021  | 0.4121280  | -3.0769029 |  |  |
| H                        | 2.0494227  | 1.5494923  | -4.4891225 |  |  |
| H                        | 3.9650959  | 0.1435490  | -3.8104685 |  |  |
| C                        | -3.8232695 | 1.7758804  | 0.9613982  |  |  |
| H                        | -4.5527516 | 2.2618234  | 1.6354468  |  |  |
| H                        | -3.4068086 | 2.5560456  | 0.3113574  |  |  |
| C                        | -5.3130750 | -1.8301767 | -2.1419140 |  |  |
| H                        | -4.2960570 | -2.1306915 | -2.4091418 |  |  |
| H                        | -5.7896505 | -2.6417721 | -1.5759346 |  |  |
| H                        | -5.8933127 | -1.6281075 | -3.0496805 |  |  |
| C                        | -0.1710232 | -3.3862207 | 1.1781603  |  |  |
| C                        | 0.0299838  | -4.6619013 | 0.6316901  |  |  |
| C                        | -0.8278231 | -3.2793375 | 2.4182457  |  |  |
| C                        | -0.4004400 | -5.8011114 | 1.3172030  |  |  |
| H                        | 0.5147885  | -4.7736553 | -0.3379306 |  |  |
| C                        | -1.2438748 | -4.4173371 | 3.1072862  |  |  |
| H                        | -1.0216702 | -2.2917007 | 2.8449154  |  |  |
| C                        | -1.0307693 | -5.6842801 | 2.5566716  |  |  |
| H                        | -0.2398364 | -6.7859845 | 0.8754379  |  |  |
| H                        | -1.7435190 | -4.3140000 | 4.0719315  |  |  |
| H                        | -1.3625059 | -6.5764576 | 3.0900129  |  |  |
| C                        | 0.9279067  | -2.3806034 | -1.3079716 |  |  |
| C                        | 2.1142899  | -3.1258274 | -1.4097554 |  |  |
| C                        | 0.2081127  | -2.0678029 | -2.4690818 |  |  |
| C                        | 2.5608942  | -3.5633059 | -2.6566665 |  |  |
| H                        | 2.6965557  | -3.3484838 | -0.5137443 |  |  |
| C                        | 0.6641747  | -2.4973984 | -3.7161694 |  |  |
| H                        | -0.7031538 | -1.4739227 | -2.3868192 |  |  |
| C                        | 1.8375527  | -3.2492474 | -3.8113081 |  |  |
| H                        | 3.4792915  | -4.1490179 | -2.7275597 |  |  |
| H                        | 0.1048452  | -2.2405402 | -4.6172945 |  |  |
| H                        | 2.1911007  | -3.5892899 | -4.7861816 |  |  |
| C                        | 0.7944214  | 2.4543013  | 1.2825492  |  |  |
| C                        | 1.7086686  | 3.4571729  | 0.9194713  |  |  |
| C                        | 0.5977029  | 2.1619077  | 2.6401578  |  |  |
| C                        | 2.3880406  | 4.1747330  | 1.9036657  |  |  |
| H                        | 1.8994638  | 3.6659836  | -0.1348850 |  |  |
| C                        | 1.2915855  | 2.8700811  | 3.6219878  |  |  |
| H                        | -0.0832465 | 1.3601681  | 2.9309520  |  |  |
| C                        | 2.1805809  | 3.8830175  | 3.2552373  |  |  |
| H                        | 3.0908497  | 4.9575451  | 1.6133696  |  |  |
| H                        | 1.1406153  | 2.6264113  | 4.6745767  |  |  |
| H                        | 2.7175178  | 4.4426391  | 4.0230217  |  |  |
| C                        | -1.1690480 | 2.7134137  | -0.8756414 |  |  |
| C                        | -1.2672177 | 4.0566264  | -0.4886820 |  |  |
| C                        | -2.0006777 | 2.2367646  | -1.9061180 |  |  |
| C                        | -2.1833303 | 4.9061217  | -1.1180789 |  |  |
| H                        | -0.6406225 | 4.4425405  | 0.3157488  |  |  |
| C                        | -2.9004664 | 3.0895379  | -2.5420391 |  |  |
| H                        | -1.9518702 | 1.1833462  | -2.1907328 |  |  |
| C                        | -2.9988583 | 4.4278542  | -2.1442290 |  |  |
| H                        | -2.2564197 | 5.9474923  | -0.8005977 |  |  |
| H                        | -3.5342892 | 2.7081766  | -3.3446537 |  |  |
| H                        | -3.7102929 | 5.0942049  | -2.6344092 |  |  |
| O                        | 4.2528772  | 1.4357543  | 0.7216631  |  |  |
| O                        | 4.3254301  | -0.8019828 | -1.2904477 |  |  |
| C                        | 5.3634832  | -1.1653674 | -2.2002285 |  |  |
| H                        | 6.0637594  | -1.7759430 | -1.6199419 |  |  |
| H                        | 4.9681821  | -1.7591532 | -3.0406393 |  |  |
| H                        | 5.8860503  | -0.2759925 | -2.5881781 |  |  |
| C                        | 5.3268512  | 2.0689049  | 1.4156796  |  |  |
| H                        | 5.7236233  | 2.8197101  | 0.7234805  |  |  |
| H                        | 4.9714023  | 2.5684028  | 2.3318560  |  |  |
| H                        | 6.1211634  | 1.3484317  | 1.6695510  |  |  |

```

VIR.xyz
98
Energy = -2817.853890877
Rh -1.2749607 -0.0330045 0.3523878
H -2.6223247 1.0612463 0.8089547
H -3.7686594 -2.0689801 2.7383297
B -3.4274166 0.0195069 0.7917429
H -2.7617345 -1.0752382 0.5623751
C -6.1306700 0.6969585 -1.8217308
C -6.7032144 0.9310350 -0.5972727
H -6.5478886 0.7695278 -2.8197828
H -7.7037406 1.2562837 -0.3376969
C -4.5815898 0.2806393 -0.2654144
N -5.7290758 0.6592241 0.3351525
N -4.8218615 0.3006901 -1.5950654
C -4.3501830 -0.0468157 2.1512889
C -4.6833767 -1.5011298 2.5212117
H -5.1914373 -2.0200044 1.6921426
H -5.3390527 -1.5583947 3.4041520
H -3.8550417 0.4373753 3.0052436
P 0.2754962 -1.6154205 0.1076421
P 0.2373003 1.5652994 0.0669683
C 1.8630370 -1.2834506 0.9760306
C 2.7406963 -0.3147052 0.4484653
C 2.1345307 -1.8885967 2.2124984
C 3.8800267 0.0493502 1.2077068
C 3.2676000 -1.5228793 2.9338489
H 1.4673790 -2.6521237 2.6084674
C 4.1372975 -0.5497213 2.4469794
H 3.4773360 -2.0003828 3.8922911
H 5.0118672 -0.2663576 3.0297716
C 1.5582947 1.2703458 -1.1757747
C 1.4954755 1.8817575 -2.4376224
C 2.5624794 0.3235876 -0.8904125
C 2.4204448 1.5446804 -3.4219556
H 0.7334830 2.6305154 -2.6473924
C 3.4828472 -0.0130136 -1.9136694
C 3.4073318 0.5932509 -3.1739685
H 2.3732358 2.0279240 -4.3991787
H 4.1153776 0.3322385 -3.9584800
C -5.6377955 0.7421524 1.8059145
H -6.5517334 0.3214670 2.2505545
H -5.5677026 1.8033431 2.0882098
C -3.8474394 -0.0774426 -2.6109045
H -3.7434969 0.7275474 -3.3496780
H -2.8861600 -0.2415562 -2.1027770
H -4.1599266 -1.0016532 -3.1143408
O 4.6653458 1.0136765 0.6578157
O 4.4015119 -0.9590383 -1.5851124
C 5.8288506 1.4245903 1.3745392
H 6.3008733 2.1948516 0.7548386
H 5.5634894 1.8539970 2.3546612
H 6.5307969 0.5867082 1.5156148
C 5.3594287 -1.3405762 -2.5715783
H 5.9884130 -2.0999243 -2.0942017
H 4.8686432 -1.7749879 -3.4580572
H 5.9845447 -0.4856640 -2.8764727
C -0.6688937 3.0529065 -0.5274421
C -0.5479058 4.3123071 0.0750619
C -1.5749796 2.8913191 -1.5908421
C -1.3136934 5.3885456 -0.3830607
H 0.1374577 4.4569310 0.9104812
C -2.3275078 3.9683907 -2.0542628
H -1.6855504 1.9052852 -2.0471689
C -2.2003565 5.2222944 -1.4476106
H -1.2134076 6.3626949 0.0982855
H -3.0180006 3.8321401 -2.8891039
H -2.7933272 6.0661785 -1.8036858
C 1.1375376 2.1265958 1.5577182
C 2.2369747 2.9939439 1.4536949
C 0.7085964 1.6977168 2.8215124
C 2.8899475 3.4318536 2.6059601
H 2.5927123 3.3107192 0.4716288
C 1.3726652 2.1287559 3.9705739
H -0.1379400 1.0090382 2.8863672
C 2.4613435 2.9979333 3.8641251
H 3.7406810 4.1103535 2.5205719
H 1.0422479 1.7825928 4.9511549
H 2.9784676 3.3374154 4.7631985
C -0.3962268 -3.1430966 0.8797768
C -0.4021404 -4.3895452 0.2383186
C -0.9822226 -3.0286076 2.1540938
C -0.9713143 -5.5012703 0.8657123
H 0.0302474 -4.4977320 -0.7564330
C -1.5348223 -4.1427975 2.7830472
H -1.0112973 -2.0524233 2.6450093
C -1.5322078 -5.3834756 2.1381196
H -0.9735311 -6.4648275 0.3535269
H -1.9753674 -4.0419198 3.7765206
H -1.9718669 -6.2548740 2.6258570
C 0.7969312 -2.1262403 -1.5727608
C 1.8830308 -2.9977554 -1.7549974
C 0.0993274 -1.6513679 -2.6907347
C 2.2496866 -3.3972637 -3.0402087
H 2.4519546 -3.3491407 -0.8922629
C 0.4768370 -2.0411691 -3.9760253
H -0.7231353 -0.9495308 -2.5350875
C 1.5494449 -2.9188828 -4.1517756
H 3.0904886 -4.0801047 -3.1746197
H -0.0612070 -1.6546813 -4.8432209
H 1.8433706 -3.2279138 -5.1562733

```

IIIB.xyz

98

Energy = -2817.806229631

Rh -1.3974641 0.8174852 -0.0302421  
H -3.2134769 -1.0716494 -1.4571969  
B -3.0849281 0.0070624 -0.9350211  
H -2.1133635 0.7286448 -1.5990834  
C -4.4130120 0.6868371 -0.5208843  
C -5.9007856 2.1781586 0.2775156  
C -6.5046681 0.9498530 0.2749011  
H -6.2773678 3.1486057 0.5788638  
H -7.4985240 0.6528204 0.5886719  
N -4.6227320 2.0001760 -0.2004289  
N -5.5898232 0.0522298 -0.2257447  
C -3.6039634 3.0495358 -0.3101440  
H -3.4244798 3.2657326 -1.3738625  
H -4.0539788 3.9544711 0.1319260  
C -2.2950664 2.7006962 0.3656343  
H -1.5837370 3.5181852 0.2146149  
C -2.3142062 2.0990820 1.7188000  
H -3.3111485 1.8403722 2.1010095  
H -1.7324333 2.6502413 2.4695545  
C -5.8119850 -1.3855877 -0.3581902  
H -5.4347206 -1.7256834 -1.3287698  
H -5.2855050 -1.9295637 0.4378634  
H -6.8876375 -1.5802082 -0.2905658  
P 0.8140477 1.7349480 -0.1206066  
P -0.6059575 -1.3624571 0.0986280  
C 1.8957532 0.6972054 -1.1963311  
C 2.3431247 -0.5519350 -0.7172212  
C 2.1990920 1.0988145 -2.5064923  
C 3.1028409 -1.3768648 -1.5839995  
C 2.9381500 0.2656543 -3.3417842  
H 1.8719437 2.0705174 -2.8721138  
C 3.3896353 -0.9733498 -2.8931992  
H 3.1719821 0.5874783 -4.3580142  
H 3.9626199 -1.6150469 -3.5600202  
C 0.8925598 -1.5263870 1.1598020  
C 2.1257267 -1.0387811 0.6795031  
C 0.7913560 -2.0309967 2.4657490  
C 3.2493461 -1.0772876 1.5428748  
C 1.9080722 -2.0484393 3.2974439  
H -0.1544116 -2.4286184 2.8301437  
C 3.1366429 -1.5697840 2.8486531  
H 1.8234598 -2.4469288 4.3098904  
H 3.9991898 -1.5866551 3.5123667  
C -0.1437108 -2.2841576 -1.4181496  
C 0.4884271 -3.5354042 -1.3203971  
C -0.4189902 -1.7510246 -2.6839119  
C 0.8168366 -4.2474764 -2.4737577  
H 0.7397867 -3.9443991 -0.3400405  
C -0.0770872 -2.4599194 -3.8362928

H -0.8807960 -0.7667885 -2.7626364  
C 0.5339377 -3.7116412 -3.7336561  
H 1.3039496 -5.2204912 -2.3877617  
H -0.2825127 -2.0293720 -4.8176438  
H 0.7934669 -4.2692060 -4.6352802  
C -1.8823831 -2.4373879 0.8999298  
C -2.5155196 -1.9665898 2.0648087  
C -2.3212544 -3.6483366 0.3466588  
C -3.5322490 -2.6984721 2.6769550  
H -2.2094773 -1.0118590 2.4971373  
C -3.3563525 -4.3725407 0.9473377  
H -1.8661505 -4.0284669 -0.5676883  
C -3.9604809 -3.9066283 2.1157458  
H -3.9945622 -2.3233946 3.5919485  
H -3.6852839 -5.3109915 0.4975068  
H -4.7597127 -4.4796392 2.5887460  
C 0.7771391 3.3870972 -0.9398452  
C 1.4075162 4.5272211 -0.4212297  
C -0.0152134 3.5246317 -2.0958706  
C 1.2634280 5.7675753 -1.0514527  
H 2.0103807 4.4565663 0.4841433  
C -0.1414568 4.7572746 -2.7339748  
H -0.5447524 2.6529596 -2.4879877  
C 0.4978698 5.8862433 -2.2112434  
H 1.7581462 6.6441777 -0.6297058  
H -0.7458180 4.8393083 -3.6393712  
H 0.3929572 6.8540706 -2.7040044  
C 1.8747993 2.0037650 1.3568400  
C 1.3302000 1.8551474 2.6389577  
C 3.2280334 2.3590709 1.2267309  
C 2.1128348 2.0723128 3.7740837  
H 0.2945361 1.5304732 2.7461590  
C 4.0068327 2.5884897 2.3608792  
H 3.6750372 2.4424851 0.2344133  
C 3.4507862 2.4478868 3.6362360  
H 1.6801167 1.9391441 4.7669067  
H 5.0555203 2.8699545 2.2486361  
H 4.0627821 2.6266678 4.5220076  
O 3.5034914 -2.5653294 -1.0566504  
O 4.4066088 -0.5973971 1.0157690  
C 4.3051874 -3.4238808 -1.8653527  
H 4.5311585 -4.2940328 -1.2390660  
H 3.7584443 -3.7525127 -2.7646634  
H 5.2454918 -2.9321758 -2.1634184  
C 5.5817093 -0.6341393 1.8232735  
H 5.8368675 -1.6661282 2.1141854  
H 6.3822735 -0.2228992 1.1984841  
H 5.4663282 -0.0120085 2.7260918  
H -1.7392842 1.0435847 1.7559872

```

IS.xyz
98
Energy = -2817.830160454
Rh 1.3990501 0.3592530 -0.6150974
P 0.1191050 -1.5258772 -0.5323370
P -0.3932215 1.5759877 -0.0446164
C 0.2850213 3.1225990 0.6968014
C -0.0361053 4.3958191 0.2033347
C 1.2438142 3.0176476 1.7228858
C 0.5751646 5.5365275 0.7324855
H -0.7647865 4.5041600 -0.6003134
C 1.8368229 4.1591038 2.2619349
H 1.5400188 2.0326069 2.0883532
C 1.5054461 5.4239578 1.7660735
H 0.3154773 6.5182385 0.3332098
H 2.5658405 4.0588562 3.0680965
H 1.9734532 6.3169113 2.1831559
C -1.4253013 0.8157163 1.2815414
C -2.3019389 -0.2348914 0.9412319
C -1.2929072 1.2184173 2.6195202
C -3.0122216 -0.8898235 1.9778505
C -2.0122581 0.5684352 3.6191537
H -0.6476121 2.0523497 2.8851905
C -2.8626357 -0.4902226 3.3117102
H -1.9089180 0.8916975 4.6561736
H -3.4072162 -0.9954462 4.1072618
C -1.6562990 2.1464926 -1.2454262
C -2.7662357 2.8773929 -0.7881740
C -1.5442913 1.8457747 -2.6082946
C -3.7289430 3.3257032 -1.6917727
H -2.8835484 3.0847990 0.2771709
C -2.5164988 2.2836623 -3.5079736
H -0.7105558 1.2340577 -2.9511298
C -3.6048287 3.0315700 -3.0530829
H -4.5841466 3.8988593 -1.3296736
H -2.4282461 2.0311178 -4.5656671
H -4.3616146 3.3798621 -3.7580202
C -0.1711620 -2.4848723 1.0046649
C -1.0638755 -3.5700098 0.9956856
C 0.4890143 -2.1437502 2.1914221
C -1.2774863 -4.3100496 2.1582129
H -1.6028623 -3.8266678 0.0818758
C 0.2622615 -2.8788335 3.3559857
H 1.1722185 -1.2950092 2.2000922
C -0.6170873 -3.9639478 3.3411082
H -1.9682090 -5.1549651 2.1418889
H 0.7719474 -2.6000291 4.2797510
H -0.7898802 -4.5406218 4.2515003
C 0.9976491 -2.6841005 -1.6554207
C 1.3786887 -2.2223994 -2.9293619
C 1.3777376 -3.9730363 -1.2577044
C 2.1020056 -3.0424341 -3.7933624
H 1.1101868 -1.2089866 -3.2360173
C 2.1128794 -4.7881071 -2.1228885
H 1.1094273 -4.3430014 -0.2682919
C 2.4724478 -4.3292962 -3.3907268
H 2.3825139 -2.6746535 -4.7817871
H 2.4039447 -5.7889927 -1.7998973
H 3.0435662 -4.9703225 -4.0641090
C -1.5763251 -1.3599501 -1.2240707
C -1.8827310 -1.8173390 -2.5145270
C -2.5453387 -0.6801284 -0.4608537
C -3.1487192 -1.5895831 -3.0489896
H -1.1420036 -2.3647983 -3.0947549
C -3.8198234 -0.4457593 -1.0314681
C -4.1172655 -0.8999533 -2.3226440
H -3.3871322 -1.9553661 -4.0490869
H -5.0967774 -0.7208712 -2.7622980
O -4.6899826 0.2496828 -0.2537406
O -3.8086136 -1.9157177 1.5821034
C -5.9895567 0.5240184 -0.7755901
H -6.5104209 1.0840639 0.0086720
H -5.9305277 1.1397491 -1.6881750
H -6.5409765 -0.4056669 -0.9900332
C -4.5375156 -2.6288169 2.5807521
H -5.0970905 -3.4010715 2.0418330
H -3.8572916 -3.1067189 3.3045784
H -5.2423887 -1.9687867 3.1117622
C 6.6843369 1.0228274 1.0409463
C 6.0663040 2.0452558 0.3850643
C 4.5964314 0.3373058 0.5199182
N 5.7743285 -0.0152516 1.1077719
H 7.6855375 0.9438755 1.4472260
H 6.4271019 3.0276323 0.1045582
N 4.7917698 1.6112940 0.0745835
C 3.8050851 2.4311587 -0.6539240
H 4.3965339 3.1628288 -1.2293100
H 3.1914827 2.9912300 0.0668207
C 2.9732736 1.5943516 -1.5768687
H 3.5605903 0.8774898 -2.1593869
C 1.7290497 1.9634750 -2.1044487
H 1.2699822 2.9145828 -1.8272818
H 1.4464738 1.5888317 -3.0887227
C 6.0406181 -1.3083771 1.7314601
B 3.2715826 -0.5265726 0.5016115
H 3.4017514 -1.5996507 1.0407088
H 2.3687822 0.1275384 1.0945099
H 2.8993972 -0.8036791 -0.6966276
H 5.7771814 -2.1174334 1.0415602
H 7.1076195 -1.3635598 1.9726592
H 5.4504574 -1.4193686 2.6495250

```

|                          |            |            |            |   |            |            |            |
|--------------------------|------------|------------|------------|---|------------|------------|------------|
| IIS.xyz                  |            |            |            | H | -2.9541609 | -4.0101505 | 3.3156285  |
| 98                       |            |            |            | H | -3.1549756 | -6.0772541 | 1.9315454  |
| Energy = -2817.825872054 |            |            |            | C | 0.5877054  | -2.1440820 | -1.5537893 |
| Rh                       | -1.4895445 | 0.3631707  | -0.2013203 | C | 0.1622159  | -1.5949836 | -2.7704448 |
| H                        | -2.8000566 | -0.7094326 | -0.9746922 | C | 1.5514038  | -3.1658549 | -1.5496425 |
| H                        | -2.7848327 | -0.5188914 | 1.0929283  | C | 0.6986663  | -2.0580166 | -3.9730002 |
| B                        | -3.4704996 | -0.8966294 | 0.1137283  | H | -0.5804740 | -0.7931529 | -2.7597188 |
| H                        | -3.6298949 | -2.0907660 | 0.1489178  | C | 2.0759339  | -3.6320739 | -2.7541880 |
| C                        | -6.9769543 | 0.5370901  | -0.0694181 | H | 1.8983004  | -3.5860494 | -0.6042141 |
| C                        | -6.2967887 | 1.5817448  | 0.4819939  | C | 1.6533706  | -3.0772996 | -3.9663628 |
| H                        | -8.0250822 | 0.4294360  | -0.3218531 | H | 0.3710894  | -1.6205362 | -4.9173348 |
| H                        | -6.6373529 | 2.5587167  | 0.8033469  | H | 2.8192163  | -4.4312585 | -2.7465303 |
| C                        | -4.8165354 | -0.0847061 | 0.1191629  | H | 2.0697090  | -3.4412896 | -4.9071568 |
| N                        | -4.9776091 | 1.1819467  | 0.5942348  | C | 0.1170284  | 3.3411749  | -0.9642554 |
| N                        | -6.0568543 | -0.4740364 | -0.2840161 | C | 0.1703334  | 4.5132462  | -0.1932752 |
| C                        | -2.7308312 | 2.1798723  | 0.1794192  | C | -0.2305804 | 3.4561787  | -2.3248460 |
| C                        | -2.7734770 | 1.8675586  | -1.1775187 | C | -0.0872349 | 5.7602698  | -0.7696569 |
| H                        | -3.6466633 | 1.3747464  | -1.6060528 | H | 0.4207804  | 4.4602922  | 0.8660821  |
| H                        | -2.1572595 | 2.4152774  | -1.8841078 | C | -0.4722987 | 4.7025259  | -2.9023427 |
| H                        | -2.0418680 | 2.9562158  | 0.5226928  | H | -0.3148321 | 2.5591133  | -2.9419387 |
| P                        | -0.1536500 | -1.5677550 | 0.0147535  | C | -0.3995062 | 5.8611279  | -2.1253245 |
| P                        | 0.3818707  | 1.6686777  | -0.2173642 | H | -0.0361989 | 6.6573211  | -0.1503762 |
| C                        | 1.2649695  | -1.4063281 | 1.1835952  | H | -0.7255605 | 4.7659065  | -3.9618432 |
| C                        | 2.3657175  | -0.6048121 | 0.8261807  | H | -0.5916479 | 6.8364277  | -2.5748472 |
| C                        | 1.2076413  | -1.9851766 | 2.4618974  | C | 1.0198008  | 2.0814716  | 1.4578408  |
| C                        | 3.3764591  | -0.3663841 | 1.7924841  | C | 0.2717418  | 1.7323219  | 2.5896273  |
| C                        | 2.2156812  | -1.7448256 | 3.3899969  | C | 2.2336713  | 2.7695609  | 1.6177849  |
| H                        | 0.3897959  | -2.6476095 | 2.7318253  | C | 0.7283512  | 2.0621532  | 3.8669260  |
| C                        | 3.2941879  | -0.9236170 | 3.0726611  | H | -0.6608934 | 1.1775926  | 2.4534742  |
| H                        | 2.1608064  | -2.2052598 | 4.3776808  | C | 2.6810148  | 3.1098956  | 2.8937820  |
| H                        | 4.0685609  | -0.7340372 | 3.8137111  | H | 2.8328577  | 3.0290563  | 0.7432349  |
| C                        | 1.8872589  | 1.0335282  | -1.0888214 | C | 1.9315033  | 2.7546451  | 4.0200064  |
| C                        | 2.2821167  | 1.5601743  | -2.3299017 | H | 0.1467616  | 1.7738063  | 4.7440596  |
| C                        | 2.5949954  | -0.0533743 | -0.5401244 | H | 3.6211979  | 3.6519924  | 3.0103893  |
| C                        | 3.3377941  | 0.9944274  | -3.0370050 | H | 2.2875819  | 3.0173273  | 5.0175909  |
| H                        | 1.7901872  | 2.4361188  | -2.7415849 | O | 4.2634978  | -1.6974009 | -0.7098658 |
| C                        | 3.6562153  | -0.6262432 | -1.2876694 | O | 4.3952480  | 0.4365429  | 1.3848827  |
| C                        | 4.0187622  | -0.1114983 | -2.5358228 | C | 5.3559559  | -2.3045976 | -1.3983474 |
| H                        | 3.6346662  | 1.4214766  | -3.9962062 | H | 5.6899129  | -3.1265103 | -0.7556473 |
| H                        | 4.8318567  | -0.5545575 | -3.1078363 | H | 5.0395550  | -2.7076148 | -2.3745686 |
| C                        | -3.8884961 | 1.9887749  | 1.1340041  | H | 6.1842010  | -1.5923307 | -1.5442730 |
| H                        | -3.5457168 | 1.5413828  | 2.0803101  | C | 5.4548191  | 0.6991596  | 2.3036974  |
| H                        | -4.3158064 | 2.9744057  | 1.3766550  | H | 6.1553597  | 1.3494231  | 1.7684304  |
| C                        | -1.0856358 | -3.0329692 | 0.6247048  | H | 5.0849961  | 1.2196450  | 3.2025022  |
| C                        | -1.2236779 | -4.1900994 | -0.1548297 | H | 5.9688187  | -0.2296600 | 2.5998982  |
| C                        | -1.7391880 | -2.9781976 | 1.8689450  | C | -6.3666324 | -1.7562639 | -0.9054204 |
| C                        | -1.9697806 | -5.2754581 | 0.3122294  | H | -6.4746031 | -1.6362795 | -1.9920183 |
| H                        | -0.7535793 | -4.2518263 | -1.1355568 | H | -5.5470881 | -2.4510658 | -0.6970847 |
| C                        | -2.4646143 | -4.0694437 | 2.3422197  | H | -7.3008741 | -2.1491073 | -0.4863933 |
| H                        | -1.7051526 | -2.0648880 | 2.4639144  |   |            |            |            |
| C                        | -2.5813323 | -5.2245479 | 1.5648493  |   |            |            |            |
| H                        | -2.0658472 | -6.1667169 | -0.3100174 |   |            |            |            |



IIIS.xyz

98

Energy = -2817.812577848

|    |            |            |            |
|----|------------|------------|------------|
| Rh | -1.2998491 | 0.5539473  | -0.6547013 |
| H  | -2.3755416 | -0.5706951 | -1.0208553 |
| H  | -2.2100393 | 2.2630944  | 1.3591146  |
| B  | -2.6299749 | 1.1679098  | 1.0501613  |
| H  | -2.5668487 | 0.3348180  | 1.9170103  |
| C  | -6.0738330 | 0.8925196  | -0.5139156 |
| C  | -5.5462738 | 1.9637574  | -1.1784457 |
| H  | -7.0403124 | 0.4109822  | -0.6040139 |
| H  | -5.9594946 | 2.5827386  | -1.9661770 |
| C  | -4.0097318 | 1.2552810  | 0.3152164  |
| N  | -4.2926020 | 2.1779366  | -0.6473422 |
| N  | -5.1205047 | 0.4727236  | 0.3959594  |
| C  | -2.1148320 | 2.3648166  | -1.7813599 |
| C  | -2.2978821 | 1.1687210  | -2.4806200 |
| H  | -3.2923701 | 0.7409415  | -2.6113620 |
| H  | -1.5639045 | 0.8702493  | -3.2357934 |
| H  | -1.2690147 | 3.0112413  | -2.0211664 |
| P  | -0.5506497 | -1.4757712 | 0.1585175  |
| P  | 0.6092847  | 1.8064215  | -0.0442337 |
| C  | 1.0800212  | -1.5547046 | 1.0230735  |
| C  | 2.1973775  | -0.9380688 | 0.4235008  |
| C  | 1.2224398  | -2.2107275 | 2.2558016  |
| C  | 3.4324339  | -0.9442025 | 1.1131769  |
| C  | 2.4531463  | -2.2218536 | 2.9065183  |
| H  | 0.3788805  | -2.7283865 | 2.7063327  |
| C  | 3.5573455  | -1.5769038 | 2.3552965  |
| H  | 2.5534047  | -2.7368264 | 3.8631926  |
| H  | 4.5065691  | -1.5769640 | 2.8880187  |
| C  | 1.5948160  | 0.8778756  | -1.2810853 |
| C  | 1.5455403  | 1.3041667  | -2.6248926 |
| C  | 2.1721870  | -0.3650275 | -0.9548304 |
| C  | 2.1079723  | 0.5213029  | -3.6267717 |
| H  | 1.0667798  | 2.2488585  | -2.8826177 |
| C  | 2.7632920  | -1.1319850 | -1.9912625 |
| C  | 2.7260178  | -0.6906406 | -3.3197819 |
| H  | 2.0713960  | 0.8585103  | -4.6639048 |
| H  | 3.1641166  | -1.2899380 | -4.1158060 |
| C  | -3.2696090 | 3.0988762  | -1.1327369 |
| H  | -2.9183357 | 3.7061076  | -0.2875888 |
| H  | -3.7490035 | 3.7792453  | -1.8541842 |
| C  | -1.7221162 | -2.3912461 | 1.2361075  |
| C  | -2.5030391 | -3.4282969 | 0.7031206  |
| C  | -1.9258796 | -2.0087172 | 2.5737535  |
| C  | -3.4548077 | -4.0776311 | 1.4926830  |
| H  | -2.3633263 | -3.7388207 | -0.3330434 |
| C  | -2.8697345 | -2.6675165 | 3.3634810  |
| H  | -1.3400499 | -1.1989442 | 3.0079595  |
| C  | -3.6381959 | -3.7031391 | 2.8254567  |
| H  | -4.0456955 | -4.8890202 | 1.0643129  |

|   |            |            |            |
|---|------------|------------|------------|
| H | -3.0045032 | -2.3669078 | 4.4038325  |
| H | -4.3726966 | -4.2197952 | 3.4452538  |
| C | -0.2557400 | -2.6410357 | -1.2391048 |
| C | 0.4927626  | -3.8076413 | -1.0072925 |
| C | -0.7747882 | -2.4068306 | -2.5193189 |
| C | 0.7011024  | -4.7254468 | -2.0357238 |
| H | 0.9177580  | -3.9965248 | -0.0203918 |
| C | -0.5521181 | -3.3207808 | -3.5518025 |
| H | -1.3584697 | -1.5053540 | -2.7041416 |
| C | 0.1828948  | -4.4828523 | -3.3116841 |
| H | 1.2757980  | -5.6324493 | -1.8405708 |
| H | -0.9568949 | -3.1229226 | -4.5456339 |
| H | 0.3515508  | -5.2007246 | -4.1162225 |
| C | 0.8114627  | 3.5916010  | -0.4214827 |
| C | -0.1255649 | 4.4565467  | 0.1693003  |
| C | 1.8775865  | 4.1373286  | -1.1521849 |
| C | -0.0099070 | 5.8377092  | 0.0167268  |
| H | -0.9345449 | 4.0392356  | 0.7735959  |
| C | 1.9858616  | 5.5214341  | -1.3088952 |
| H | 2.6302178  | 3.4858360  | -1.5979698 |
| C | 1.0429457  | 6.3733134  | -0.7304419 |
| H | -0.7402519 | 6.4982958  | 0.4870443  |
| H | 2.8177402  | 5.9345785  | -1.8817717 |
| H | 1.1330439  | 7.4535544  | -0.8536650 |
| C | 1.4289771  | 1.7610016  | 1.5922287  |
| C | 2.7326745  | 2.2557781  | 1.7565090  |
| C | 0.7006634  | 1.3363905  | 2.7104121  |
| C | 3.3065755  | 2.2966575  | 3.0254499  |
| H | 3.3006407  | 2.6043952  | 0.8925409  |
| C | 1.2791037  | 1.3832792  | 3.9805426  |
| H | -0.3226889 | 0.9809220  | 2.5798490  |
| C | 2.5817399  | 1.8590854  | 4.1392315  |
| H | 4.3204059  | 2.6817978  | 3.1490106  |
| H | 0.7075403  | 1.0508965  | 4.8486462  |
| H | 3.0314967  | 1.8991272  | 5.1325942  |
| O | 3.3301546  | -2.3016302 | -1.5995430 |
| O | 4.4455960  | -0.2858323 | 0.4900097  |
| C | 5.7212951  | -0.2546274 | 1.1314013  |
| H | 6.3746939  | 0.3156520  | 0.4623737  |
| H | 5.6638416  | 0.2516823  | 2.1089005  |
| H | 6.1284948  | -1.2699896 | 1.2642453  |
| C | 3.9196735  | -3.1358083 | -2.5976009 |
| H | 4.3052989  | -4.0089652 | -2.0602655 |
| H | 3.1704222  | -3.4633166 | -3.3361675 |
| H | 4.7508368  | -2.6234141 | -3.1083217 |
| C | -5.2762854 | -0.6718314 | 1.2852720  |
| H | -5.3469409 | -1.5961256 | 0.6971266  |
| H | -4.3981853 | -0.7310200 | 1.9340723  |
| H | -6.1808394 | -0.5512883 | 1.8947540  |

|                          |            |            |            |  |  |
|--------------------------|------------|------------|------------|--|--|
| IVS.xyz                  |            |            |            |  |  |
| 98                       |            |            |            |  |  |
| Energy = -2817.816724416 |            |            |            |  |  |
| Rh                       | -1.3156631 | -0.3257486 | -0.7449240 |  |  |
| H                        | -2.3714678 | -1.8995634 | -1.0327944 |  |  |
| H                        | -2.4822376 | 2.0017362  | 0.4176387  |  |  |
| B                        | -2.6312725 | 0.8141939  | 0.6443916  |  |  |
| H                        | -2.3087605 | 0.4701386  | 1.7584265  |  |  |
| C                        | -6.2736222 | -0.2279425 | 0.4027142  |  |  |
| C                        | -6.0183884 | 0.1636460  | -0.8812158 |  |  |
| H                        | -7.1832160 | -0.5935352 | 0.8640755  |  |  |
| H                        | -6.6575589 | 0.1875708  | -1.7558250 |  |  |
| C                        | -4.1141031 | 0.4134242  | 0.3009432  |  |  |
| N                        | -4.6977293 | 0.5582156  | -0.9166407 |  |  |
| N                        | -5.0939299 | -0.0793273 | 1.1096613  |  |  |
| C                        | -2.7309884 | -0.0462406 | -2.2462662 |  |  |
| C                        | -2.9672647 | -1.5066591 | -1.9615265 |  |  |
| H                        | -3.9943255 | -1.7617543 | -1.6625565 |  |  |
| H                        | -2.6345311 | -2.1831227 | -2.7585044 |  |  |
| H                        | -2.2366674 | 0.1324276  | -3.2077491 |  |  |
| P                        | 0.1124814  | -1.5479993 | 0.6708596  |  |  |
| P                        | -0.0277309 | 1.4792936  | -0.8648370 |  |  |
| C                        | 1.5185422  | -0.7242801 | 1.5127471  |  |  |
| C                        | 2.3923278  | 0.0371599  | 0.7123408  |  |  |
| C                        | 1.7002969  | -0.7863189 | 2.9021274  |  |  |
| C                        | 3.4301130  | 0.7621459  | 1.3500225  |  |  |
| C                        | 2.7306326  | -0.0695407 | 3.5041960  |  |  |
| H                        | 1.0473408  | -1.4045204 | 3.5151069  |  |  |
| C                        | 3.5876409  | 0.7188027  | 2.7402842  |  |  |
| H                        | 2.8690736  | -0.1230733 | 4.5852461  |  |  |
| H                        | 4.3793499  | 1.2854011  | 3.2269611  |  |  |
| C                        | 1.5079835  | 0.7758206  | -1.6110143 |  |  |
| C                        | 1.7200727  | 0.8204727  | -2.9994415 |  |  |
| C                        | 2.3916220  | 0.0407991  | -0.7856346 |  |  |
| C                        | 2.7709907  | 0.1151410  | -3.5773101 |  |  |
| H                        | 1.0851749  | 1.4329267  | -3.6328338 |  |  |
| C                        | 3.4438109  | -0.6835580 | -1.4044964 |  |  |
| C                        | 3.6220474  | -0.6583304 | -2.7926270 |  |  |
| H                        | 2.9294346  | 0.1665859  | -4.6556699 |  |  |
| H                        | 4.4289917  | -1.2201495 | -3.2595410 |  |  |
| C                        | -3.9087659 | 0.9034372  | -2.0969121 |  |  |
| H                        | -3.5490488 | 1.9401946  | -2.0024821 |  |  |
| H                        | -4.5935073 | 0.8636411  | -2.9601500 |  |  |
| C                        | -4.9390914 | -0.3570697 | 2.5333608  |  |  |
| H                        | -3.9750535 | -0.8477649 | 2.7049639  |  |  |
| H                        | -4.9796294 | 0.5742737  | 3.1133817  |  |  |
| H                        | -5.7500259 | -1.0215587 | 2.8515197  |  |  |
| C                        | -0.8023254 | -2.4725243 | 1.9649528  |  |  |
| C                        | -1.0880731 | -3.8386480 | 1.8086229  |  |  |
| C                        | -1.3449312 | -1.7916432 | 3.0708130  |  |  |
| C                        | -1.8823941 | -4.5097785 | 2.7411071  |  |  |
| H                        | -0.6820158 | -4.3866810 | 0.9573581  |  |  |
| C                        | -2.1223376 | -2.4705604 | 4.0100023  |  |  |
| H                        | -1.1562989 | -0.7259847 | 3.2018243  |  |  |
| C                        | -2.3965931 | -3.8314789 | 3.8475425  |  |  |
| H                        | -2.0882863 | -5.5728427 | 2.6056583  |  |  |
| H                        | -2.5126162 | -1.9327214 | 4.8763683  |  |  |
| H                        | -3.0031790 | -4.3611994 | 4.5836511  |  |  |
| C                        | 0.9698776  | -2.8560555 | -0.2952504 |  |  |
| C                        | 1.9558150  | -3.6588493 | 0.3002651  |  |  |
| C                        | 0.6670040  | -3.0393330 | -1.6514832 |  |  |
| C                        | 2.6077938  | -4.6396584 | -0.4461685 |  |  |
| H                        | 2.2186974  | -3.5077210 | 1.3489327  |  |  |
| C                        | 1.3275293  | -4.0136120 | -2.4021857 |  |  |
| H                        | -0.0746797 | -2.3963241 | -2.1328210 |  |  |
| C                        | 2.2954067  | -4.8185973 | -1.7978834 |  |  |
| H                        | 3.3685178  | -5.2632779 | 0.0266025  |  |  |
| H                        | 1.0902368  | -4.1397805 | -3.4596254 |  |  |
| H                        | 2.8100475  | -5.5845851 | -2.3804519 |  |  |
| C                        | -0.7207448 | 2.8005824  | -1.9515929 |  |  |
| C                        | -1.0815063 | 4.0379996  | -1.3910313 |  |  |
| C                        | -1.0546287 | 2.5613981  | -3.2976735 |  |  |
| C                        | -1.7244391 | 5.0115160  | -2.1591402 |  |  |
| H                        | -0.8631317 | 4.2473761  | -0.3446265 |  |  |
| C                        | -1.6775708 | 3.5422557  | -4.0690567 |  |  |
| H                        | -0.8450049 | 1.5957672  | -3.7542477 |  |  |
| C                        | -2.0143075 | 4.7741442  | -3.5027373 |  |  |
| H                        | -1.9948601 | 5.9631712  | -1.6988995 |  |  |
| H                        | -1.9072567 | 3.3376813  | -5.1161445 |  |  |
| H                        | -2.5060948 | 5.5398804  | -4.1044218 |  |  |
| C                        | 0.6157521  | 2.4618220  | 0.5465980  |  |  |
| C                        | 1.6271871  | 3.3970106  | 0.2662208  |  |  |
| C                        | 0.1314505  | 2.3399032  | 1.8533662  |  |  |
| C                        | 2.1388204  | 4.2012335  | 1.2830739  |  |  |
| H                        | 2.0189912  | 3.4922223  | -0.7481339 |  |  |
| C                        | 0.6563696  | 3.1387116  | 2.8706005  |  |  |
| H                        | -0.6549999 | 1.6203261  | 2.0717945  |  |  |
| C                        | 1.6563723  | 4.0715808  | 2.5887177  |  |  |
| H                        | 2.9183420  | 4.9299765  | 1.0542163  |  |  |
| H                        | 0.2806948  | 3.0299347  | 3.8892118  |  |  |
| H                        | 2.0594791  | 4.6993436  | 3.3851683  |  |  |
| O                        | 4.2281591  | 1.4876334  | 0.5222046  |  |  |
| O                        | 4.2423789  | -1.3853256 | -0.5583269 |  |  |
| C                        | 5.2937366  | 2.2394943  | 1.1017209  |  |  |
| H                        | 5.7964414  | 2.7337077  | 0.2632655  |  |  |
| H                        | 4.9105181  | 3.0011891  | 1.8004574  |  |  |
| H                        | 6.0093237  | 1.5843980  | 1.6245832  |  |  |
| C                        | 5.3087203  | -2.1544369 | -1.1135908 |  |  |
| H                        | 5.8031740  | -2.6300164 | -0.2596263 |  |  |
| H                        | 4.9267308  | -2.9330353 | -1.7938223 |  |  |
| H                        | 6.0313602  | -1.5149798 | -1.6459751 |  |  |

|                          |            |            |            |  |  |
|--------------------------|------------|------------|------------|--|--|
| VS.xyz                   |            |            |            |  |  |
| 98                       |            |            |            |  |  |
| Energy = -2817.818912203 |            |            |            |  |  |
| Rh                       | -1.5211090 | -0.1254705 | -0.8394756 |  |  |
| H                        | -3.6925787 | -0.3628069 | -2.8496410 |  |  |
| H                        | -2.2032493 | -1.1990694 | 1.6964543  |  |  |
| B                        | -2.6828937 | -0.5667329 | 0.7795394  |  |  |
| H                        | -2.9369428 | -1.2696127 | -0.2754321 |  |  |
| C                        | -5.5806496 | 1.1784265  | 2.4725699  |  |  |
| C                        | -5.3436664 | 2.0380081  | 1.4363629  |  |  |
| H                        | -6.3201622 | 1.2085553  | 3.2642423  |  |  |
| H                        | -5.8241920 | 2.9709684  | 1.1665293  |  |  |
| C                        | -3.8711645 | 0.3506640  | 1.2617829  |  |  |
| N                        | -4.2991119 | 1.5138525  | 0.7106050  |  |  |
| N                        | -4.6641382 | 0.1559506  | 2.3571874  |  |  |
| C                        | -3.0732749 | 1.1940312  | -1.4386337 |  |  |
| C                        | -4.1397192 | 0.3597374  | -2.1496226 |  |  |
| H                        | -4.7618150 | -0.2160590 | -1.4480278 |  |  |
| H                        | -4.8149182 | 1.0026218  | -2.7454173 |  |  |
| H                        | -2.5570430 | 1.8166918  | -2.1852023 |  |  |
| P                        | 0.0444932  | -1.8994236 | -0.6213380 |  |  |
| P                        | -0.0036042 | 1.4757267  | -0.4441705 |  |  |
| C                        | 1.0508114  | -1.6779245 | 0.9001176  |  |  |
| C                        | 1.9951898  | -0.6298176 | 0.9391038  |  |  |
| C                        | 0.7581694  | -2.4078445 | 2.0616441  |  |  |
| C                        | 2.6218917  | -0.3310994 | 2.1741725  |  |  |
| C                        | 1.3824657  | -2.0892580 | 3.2649827  |  |  |
| H                        | 0.0571539  | -3.2394069 | 2.0236222  |  |  |
| C                        | 2.3030675  | -1.0464422 | 3.3350459  |  |  |
| H                        | 1.1539137  | -2.6655966 | 4.1631371  |  |  |
| H                        | 2.7795073  | -0.8071371 | 4.2839760  |  |  |
| C                        | 1.7394675  | 1.1164439  | -0.9425576 |  |  |
| C                        | 2.3218608  | 1.8077983  | -2.0182389 |  |  |
| C                        | 2.4691917  | 0.1153202  | -0.2680939 |  |  |
| C                        | 3.6132408  | 1.5033306  | -2.4360192 |  |  |
| H                        | 1.7788018  | 2.6040630  | -2.5208791 |  |  |
| C                        | 3.7800185  | -0.1825602 | -0.7218771 |  |  |
| C                        | 4.3455121  | 0.5039172  | -1.8021347 |  |  |
| H                        | 4.0562014  | 2.0516403  | -3.2688333 |  |  |
| H                        | 5.3497117  | 0.2657708  | -2.1478551 |  |  |
| C                        | -3.6697384 | 2.1722441  | -0.4517474 |  |  |
| H                        | -2.9052357 | 2.8647431  | -0.0691659 |  |  |
| H                        | -4.4703760 | 2.7802964  | -0.9111840 |  |  |
| C                        | -4.6190036 | -1.0122307 | 3.2310231  |  |  |
| H                        | -5.2468551 | -1.8177412 | 2.8270089  |  |  |
| H                        | -3.5853010 | -1.3655007 | 3.3045338  |  |  |
| H                        | -4.9850668 | -0.7274660 | 4.2237407  |  |  |
| C                        | -0.3863353 | 3.0542268  | -1.3197670 |  |  |
| C                        | -0.5921610 | 4.2693579  | -0.6512974 |  |  |
| C                        | -0.5697754 | 3.0140616  | -2.7152624 |  |  |
| C                        | -0.9543279 | 5.4178491  | -1.3620264 |  |  |
| H                        | -0.4693753 | 4.3276596  | 0.4304257  |  |  |
| C                        | -0.9160532 | 4.1630127  | -3.4244392 |  |  |
| H                        | -0.4376256 | 2.0720058  | -3.2535236 |  |  |
| C                        | -1.1112889 | 5.3705858  | -2.7473926 |  |  |
| H                        | -1.1079513 | 6.3552813  | -0.8249204 |  |  |
| H                        | -1.0422334 | 4.1132636  | -4.5070800 |  |  |
| H                        | -1.3880783 | 6.2696343  | -3.2999489 |  |  |
| C                        | 0.2167130  | 1.9954729  | 1.3058930  |  |  |
| C                        | 1.2800586  | 2.8612192  | 1.6187690  |  |  |
| C                        | -0.6444454 | 1.5798683  | 2.3262790  |  |  |
| C                        | 1.4537584  | 3.3162929  | 2.9253285  |  |  |
| H                        | 1.9793861  | 3.1713816  | 0.8407900  |  |  |
| C                        | -0.4607903 | 2.0249242  | 3.6360849  |  |  |
| H                        | -1.4404973 | 0.8740320  | 2.0928278  |  |  |
| C                        | 0.5850039  | 2.8994646  | 3.9378419  |  |  |
| H                        | 2.2794399  | 3.9921761  | 3.1542310  |  |  |
| H                        | -1.1319791 | 1.6800511  | 4.4245288  |  |  |
| H                        | 0.7278472  | 3.2518769  | 4.9607654  |  |  |
| C                        | 1.2592126  | -2.0975000 | -1.9778386 |  |  |
| C                        | 2.3911294  | -2.9154842 | -1.8306524 |  |  |
| C                        | 1.0171005  | -1.4739790 | -3.2088122 |  |  |
| C                        | 3.2629341  | -3.1024752 | -2.9025196 |  |  |
| H                        | 2.5910836  | -3.3985188 | -0.8726222 |  |  |
| C                        | 1.8942229  | -1.6571876 | -4.2794057 |  |  |
| H                        | 0.1360843  | -0.8367905 | -3.3267436 |  |  |
| C                        | 3.0173381  | -2.4729661 | -4.1270560 |  |  |
| H                        | 4.1367190  | -3.7457693 | -2.7836211 |  |  |
| H                        | 1.7005587  | -1.1633164 | -5.2327982 |  |  |
| H                        | 3.7017911  | -2.6203765 | -4.9639760 |  |  |
| C                        | -0.7178787 | -3.5819044 | -0.5418582 |  |  |
| C                        | -0.4050592 | -4.5682786 | -1.4925991 |  |  |
| C                        | -1.7020855 | -3.8762859 | 0.4202560  |  |  |
| C                        | -1.0376620 | -5.8134980 | -1.4659586 |  |  |
| H                        | 0.3336037  | -4.3708914 | -2.2679378 |  |  |
| C                        | -2.3206686 | -5.1252904 | 0.4530574  |  |  |
| H                        | -2.0001590 | -3.1196641 | 1.1439530  |  |  |
| C                        | -1.9907491 | -6.1016400 | -0.4898107 |  |  |
| H                        | -0.7780554 | -6.5607640 | -2.2176163 |  |  |
| H                        | -3.0720542 | -5.3336309 | 1.2169939  |  |  |
| H                        | -2.4799265 | -7.0766002 | -0.4676654 |  |  |
| O                        | 3.5302934  | 0.6814027  | 2.1390327  |  |  |
| O                        | 4.4158491  | -1.1802705 | -0.0522908 |  |  |
| C                        | 4.2109293  | 1.0189548  | 3.3460661  |  |  |
| H                        | 4.8923427  | 1.8354302  | 3.0824646  |  |  |
| H                        | 3.5062079  | 1.3666402  | 4.1193561  |  |  |
| H                        | 4.7928952  | 0.1660704  | 3.7313904  |  |  |
| C                        | 5.7476843  | -1.5138801 | -0.4423033 |  |  |
| H                        | 6.0572723  | -2.3228002 | 0.2283369  |  |  |
| H                        | 5.7827410  | -1.8685656 | -1.4854503 |  |  |
| H                        | 6.4281554  | -0.6554699 | -0.3213126 |  |  |

|                          |            |            |            |   |            |            |            |
|--------------------------|------------|------------|------------|---|------------|------------|------------|
| VIS.xyz                  |            |            |            | H | 6.2813064  | -0.8610152 | -2.0487064 |
| 98                       |            |            |            | C | 5.6264687  | 1.2729742  | 2.0631792  |
| Energy = -2817.854979644 |            |            |            | H | 6.2338594  | 1.9840025  | 1.4925692  |
| Rh                       | -1.3199331 | 0.1463231  | -0.1545995 | H | 5.2497774  | 1.7623359  | 2.9765573  |
| H                        | -2.7797715 | 0.1478931  | -3.3698136 | H | 6.2431445  | 0.4019564  | 2.3381620  |
| H                        | -2.7465353 | 1.2580464  | -0.3049812 | C | -0.3747851 | 3.2060898  | -0.8613018 |
| B                        | -3.4797659 | 0.2014750  | -0.5197965 | C | -0.2155811 | 4.4786775  | -0.2954398 |
| H                        | -2.7494195 | -0.8960384 | -0.4777698 | C | -1.1275522 | 3.0748651  | -2.0429436 |
| C                        | -6.2488496 | -0.2064514 | 2.0763171  | C | -0.7893616 | 5.5974035  | -0.9059402 |
| C                        | -6.8334728 | -0.4004197 | 0.8506307  | H | 0.3486935  | 4.6027130  | 0.6288542  |
| H                        | -6.6759581 | -0.2348887 | 3.0723825  | C | -1.6874025 | 4.1940766  | -2.6560956 |
| H                        | -7.8572387 | -0.6399420 | 0.5884519  | H | -1.2795194 | 2.0818511  | -2.4733157 |
| C                        | -4.6618765 | 0.0608840  | 0.5263813  | C | -1.5203854 | 5.4602562  | -2.0867212 |
| N                        | -5.8346767 | -0.2227678 | -0.0789918 | H | -0.6621485 | 6.5815446  | -0.4519784 |
| N                        | -4.9093424 | 0.0729380  | 1.8541415  | H | -2.2604372 | 4.0773397  | -3.5775702 |
| C                        | -4.3666637 | 0.2769398  | -1.8963615 | H | -1.9644598 | 6.3369122  | -2.5609171 |
| C                        | -3.7373282 | -0.3433033 | -3.1434563 | C | 0.9894790  | 2.2119801  | 1.5083546  |
| H                        | -3.5237603 | -1.4121285 | -2.9884502 | C | 2.1379490  | 3.0178196  | 1.5696173  |
| H                        | -4.3787903 | -0.2486988 | -4.0335921 | C | 0.3504452  | 1.8295592  | 2.6950548  |
| H                        | -4.5393993 | 1.3518236  | -2.0897055 | C | 2.6265558  | 3.4437143  | 2.8048274  |
| P                        | 0.1485219  | -1.5040323 | 0.0835492  | H | 2.6597231  | 3.2954472  | 0.6520365  |
| P                        | 0.3000847  | 1.6727240  | -0.0998939 | C | 0.8493172  | 2.2458765  | 3.9297266  |
| C                        | 1.5981729  | -1.2156322 | 1.1741004  | H | -0.5270919 | 1.1811177  | 2.6322084  |
| C                        | 2.6043997  | -0.3254901 | 0.7483832  | C | 1.9854149  | 3.0571073  | 3.9855625  |
| C                        | 1.6405011  | -1.7739161 | 2.4610897  | H | 3.5156463  | 4.0755233  | 2.8457894  |
| C                        | 3.6380138  | 0.0089580  | 1.6574960  | H | 0.3554321  | 1.9327343  | 4.8510558  |
| C                        | 2.6740082  | -1.4394073 | 3.3317506  | H | 2.3747503  | 3.3857320  | 4.9506097  |
| H                        | 0.8739134  | -2.4783289 | 2.7793132  | C | -0.7589165 | -2.9113801 | 0.8454385  |
| C                        | 3.6677825  | -0.5433103 | 2.9442622  | C | -0.7452194 | -4.2077211 | 0.3135841  |
| H                        | 2.7074124  | -1.8807082 | 4.3291426  | C | -1.5535160 | -2.6464544 | 1.9753408  |
| H                        | 4.4621569  | -0.2830816 | 3.6414711  | C | -1.5067517 | -5.2195238 | 0.9059051  |
| C                        | 1.7780915  | 1.2370850  | -1.1039923 | H | -0.1472282 | -4.4312198 | -0.5701750 |
| C                        | 1.9377071  | 1.7759477  | -2.3898828 | C | -2.3008474 | -3.6598384 | 2.5720165  |
| C                        | 2.6669820  | 0.2517631  | -0.6281304 | H | -1.5802753 | -1.6311457 | 2.3778841  |
| C                        | 2.9702495  | 1.3291973  | -3.2096756 | C | -2.2815687 | -4.9512911 | 2.0350842  |
| H                        | 1.2611834  | 2.5499902  | -2.7479850 | H | -1.4908868 | -6.2238249 | 0.4794617  |
| C                        | 3.7029915  | -0.1935137 | -1.4856755 | H | -2.9019171 | -3.4449183 | 3.4578767  |
| C                        | 3.8486185  | 0.3404549  | -2.7720209 | H | -2.8711539 | -5.7453162 | 2.4960200  |
| H                        | 3.0932421  | 1.7544403  | -4.2069816 | C | 0.8675067  | -2.1814396 | -1.4562422 |
| H                        | 4.6433020  | -0.0060585 | -3.4301941 | C | 1.9402655  | -3.0865957 | -1.4177282 |
| C                        | -5.7419283 | -0.3436635 | -1.5456095 | C | 0.3230435  | -1.8022374 | -2.6912465 |
| H                        | -6.6021804 | 0.1580850  | -2.0106567 | C | 2.4523659  | -3.6103329 | -2.6049371 |
| H                        | -5.7807396 | -1.4128689 | -1.8089461 | H | 2.3860233  | -3.3660031 | -0.4614045 |
| C                        | -3.9071273 | 0.3620757  | 2.8729621  | C | 0.8460747  | -2.3200237 | -3.8766539 |
| H                        | -3.8522400 | -0.4667441 | 3.5903488  | H | -0.5007678 | -1.0842501 | -2.7069432 |
| H                        | -2.9389134 | 0.4765364  | 2.3654441  | C | 1.9090700  | -3.2257719 | -3.8345579 |
| H                        | -4.1585327 | 1.2910772  | 3.4008483  | H | 3.2829029  | -4.3176914 | -2.5699378 |
| O                        | 4.5045127  | -1.1674929 | -0.9776332 | H | 0.4257094  | -2.0128505 | -4.8355897 |
| O                        | 4.5557218  | 0.8996667  | 1.1969438  | H | 2.3167297  | -3.6323273 | -4.7616813 |
| C                        | 5.5661329  | -1.6599704 | -1.7940469 |   |            |            |            |
| H                        | 6.0717122  | -2.4232443 | -1.1924243 |   |            |            |            |
| H                        | 5.1791480  | -2.1186594 | -2.7188923 |   |            |            |            |

|                          |            |            |            |            |            |            |            |
|--------------------------|------------|------------|------------|------------|------------|------------|------------|
| Ts0_IR.xyz               |            |            | H          | -1.1193203 | -0.9524640 | 3.0746205  |            |
| 98                       |            |            | C          | -2.0104145 | -4.6143966 | 2.1568638  |            |
| Energy = -2817.809595906 |            |            | H          | -0.8565235 | -4.2979624 | 0.3623775  |            |
| Rh                       | -1.2797532 | 0.2274992  | -0.0121591 | C          | -2.4781481 | -4.0648349 | 3.3511273  |
| P                        | 0.0509398  | -1.4431781 | 0.4662597  | H          | -2.5050551 | -2.3105882 | 4.6189318  |
| P                        | 0.4464746  | 1.5880406  | -0.2952234 | H          | -2.2639357 | -5.6420330 | 1.8912627  |
| C                        | -0.2242080 | 3.0922289  | -1.1190828 | H          | -3.0969304 | -4.6608794 | 4.0237079  |
| C                        | -0.0222538 | 4.3826006  | -0.6051849 | C          | 1.6825722  | -1.1588584 | 1.2580822  |
| C                        | -1.0443693 | 2.9344608  | -2.2522411 | C          | 1.9038657  | -1.5136210 | 2.5980770  |
| C                        | -0.6111847 | 5.4893497  | -1.2218112 | C          | 2.6779339  | -0.4825049 | 0.5245259  |
| H                        | 0.5952172  | 4.5300503  | 0.2806587  | C          | 3.1064053  | -1.1831101 | 3.2166105  |
| C                        | -1.6163917 | 4.0429003  | -2.8739553 | H          | 1.1451313  | -2.0611998 | 3.1542128  |
| H                        | -1.2459143 | 1.9333655  | -2.6379267 | C          | 3.8842053  | -0.1381432 | 1.1834042  |
| C                        | -1.4022860 | 5.3250031  | -2.3595842 | C          | 4.0935551  | -0.4859574 | 2.5238689  |
| H                        | -0.4458745 | 6.4855602  | -0.8082281 | H          | 3.2784987  | -1.4687564 | 4.2555865  |
| H                        | -2.2375635 | 3.9043635  | -3.7605728 | H          | 5.0213592  | -0.2203723 | 3.0273692  |
| H                        | -1.8557807 | 6.1922751  | -2.8420688 | O          | 4.7816839  | 0.5545299  | 0.4345562  |
| C                        | 1.6997810  | 0.8590131  | -1.4274666 | O          | 4.1596990  | -1.8169771 | -1.2940341 |
| C                        | 2.5553678  | -0.1433267 | -0.9256134 | C          | 6.0153595  | 0.9357746  | 1.0420480  |
| C                        | 1.7081432  | 1.1816751  | -2.7925234 | H          | 6.5727353  | 1.4724676  | 0.2666371  |
| C                        | 3.3866068  | -0.8396662 | -1.8374317 | H          | 5.8465505  | 1.6045058  | 1.9022341  |
| C                        | 2.5466181  | 0.4941180  | -3.6657282 | H          | 6.5932033  | 0.0549060  | 1.3657355  |
| H                        | 1.0696469  | 1.9768349  | -3.1731563 | C          | 5.0085408  | -2.5660956 | -2.1623509 |
| C                        | 3.3749712  | -0.5256115 | -3.2021161 | H          | 5.5284656  | -3.2845364 | -1.5191547 |
| H                        | 2.5540989  | 0.7523887  | -4.7258787 | H          | 4.4222157  | -3.1104033 | -2.9208370 |
| H                        | 4.0127504  | -1.0637344 | -3.9009985 | H          | 5.7481285  | -1.9179530 | -2.6599153 |
| C                        | 1.4658548  | 2.2534004  | 1.0778503  | C          | -7.0746132 | 0.0551960  | -0.6159224 |
| C                        | 2.6233504  | 2.9962908  | 0.7905967  | C          | -6.7095082 | 0.3022190  | 0.6748836  |
| C                        | 1.0983719  | 2.0424479  | 2.4119424  | C          | -4.8219581 | -0.0208695 | -0.5171492 |
| C                        | 3.3857699  | 3.5326924  | 1.8276806  | N          | -5.9093372 | -0.1423331 | -1.3290809 |
| H                        | 2.9339930  | 3.1435036  | -0.2454496 | H          | -8.0533352 | 0.0002336  | -1.0772005 |
| C                        | 1.8697935  | 2.5691122  | 3.4487507  | H          | -7.3084915 | 0.5041472  | 1.5548601  |
| H                        | 0.2194035  | 1.4362857  | 2.6307502  | N          | -5.3308624 | 0.2488751  | 0.7176032  |
| C                        | 3.0111766  | 3.3196139  | 3.1579578  | C          | -4.5331526 | 0.5176175  | 1.9239865  |
| H                        | 4.2794457  | 4.1149245  | 1.5960634  | H          | -3.8287001 | -0.3142565 | 2.0714406  |
| H                        | 1.5829960  | 2.3867959  | 4.4855842  | H          | -5.2443035 | 0.5120731  | 2.7644395  |
| H                        | 3.6126153  | 3.7355538  | 3.9679707  | C          | -3.8007790 | 1.8249319  | 1.8349154  |
| C                        | 0.4722965  | -2.5055053 | -0.9684972 | H          | -4.3716514 | 2.6791082  | 1.4586241  |
| C                        | 1.4264740  | -3.5275795 | -0.8355337 | C          | -2.5156784 | 1.9584667  | 2.1802158  |
| C                        | -0.1599722 | -2.3025394 | -2.2025738 | H          | -1.9474904 | 1.1105216  | 2.5669588  |
| C                        | 1.7335800  | -4.3409546 | -1.9263823 | H          | -2.0037719 | 2.9194433  | 2.1302709  |
| H                        | 1.9404371  | -3.6765898 | 0.1157991  | C          | -5.8590050 | -0.4299788 | -2.7607753 |
| C                        | 0.1602678  | -3.1108870 | -3.2941265 | B          | -3.3099906 | -0.1598374 | -0.9728615 |
| H                        | -0.8874665 | -1.4932085 | -2.2964624 | H          | -3.2443572 | -0.6805188 | -2.0630682 |
| C                        | 1.1049374  | -4.1310852 | -3.1575089 | H          | -2.7834616 | 0.9959384  | -0.9928531 |
| H                        | 2.4727549  | -5.1364516 | -1.8162833 | H          | -2.7197765 | -0.9005046 | -0.0857254 |
| H                        | -0.3256539 | -2.9399627 | -4.2561263 | H          | -5.3532362 | -1.3862801 | -2.9357483 |
| H                        | 1.3535463  | -4.7637986 | -4.0113998 | H          | -6.8856014 | -0.4815884 | -3.1384915 |
| C                        | -0.8792505 | -2.5349101 | 1.6176741  | H          | -5.3144536 | 0.3624127  | -3.2873927 |
| C                        | -1.3644838 | -1.9854164 | 2.8187987  |            |            |            |            |
| C                        | -1.2127147 | -3.8571585 | 1.2938002  |            |            |            |            |
| C                        | -2.1488253 | -2.7463386 | 3.6836807  |            |            |            |            |

```

Ts0_IIR.xyz
98
Energy = -2817.816094756
Rh -0.9895090 -0.9347112 -0.6905620
P 1.1718695 -0.9547282 -0.2820072
P -1.0728194 1.2609763 -0.3986089
C -2.7109868 1.8073736 -1.0362148
C -3.5711461 2.6406277 -0.3046630
C -3.1512544 1.2899636 -2.2692662
C -4.8384252 2.9571640 -0.8016985
H -3.2590778 3.0419782 0.6594669
C -4.4102573 1.6197823 -2.7680539
H -2.5060226 0.6096877 -2.8297557
C -5.2590182 2.4535976 -2.0334827
H -5.4976648 3.6033013 -0.2196818
H -4.7326957 1.2177118 -3.7298702
H -6.2478816 2.7056330 -2.4197660
C 0.2101205 2.1118062 -1.4037693
C 1.5480994 2.0878702 -0.9577722
C -0.1086527 2.6267073 -2.6689034
C 2.5587537 2.5591241 -1.8310624
C 0.9017009 3.0985541 -3.5026992
H -1.1448780 2.6654422 -3.0008729
C 2.2348755 3.0551431 -3.1003427
H 0.6496332 3.5025238 -4.4844488
H 3.0132269 3.4151943 -3.7707270
C -0.9490928 2.0480079 1.2504366
C -0.8281260 3.4421294 1.3716844
C -0.9985610 1.2550303 2.4032488
C -0.7743443 4.0302472 2.6352000
H -0.7604263 4.0643861 0.4773436
C -0.9302423 1.8458308 3.6659770
H -1.0751850 0.1713650 2.2942316
C -0.8234605 3.2337030 3.7835610
H -0.6883343 5.1147132 2.7238315
H -0.9505264 1.2212720 4.5610048
H -0.7734472 3.6960861 4.7707304
C 2.2537455 -0.9324825 -1.7581431
C 3.6423618 -0.7658576 -1.6285586
C 1.6878445 -1.0775992 -3.0330447
C 4.4523061 -0.7590846 -2.7644724
H 4.0867283 -0.6216316 -0.6421139
C 2.5012059 -1.0584151 -4.1665507
H 0.6037296 -1.1813467 -3.1229250
C 3.8833210 -0.9019245 -4.0334774
H 5.5312354 -0.6330367 -2.6582187
H 2.0540903 -1.1602176 -5.1565900
H 4.5189877 -0.8883081 -4.9205202
C 1.4808639 -2.5670642 0.5506584
C 0.6551511 -2.9116412 1.6376836
C 2.4562174 -3.4768776 0.1190818
C 0.8240096 -4.1290804 2.2962296
H -0.1296940 -2.2196273 1.9537623
C 2.6115444 -4.7039337 0.7721179
H 3.0951307 -3.2311928 -0.7299918
C 1.8037527 -5.0294845 1.8636239
H 0.1850636 -4.3777951 3.1456449
H 3.3731101 -5.4048769 0.4264803
H 1.9359413 -5.9838697 2.3760855
C 1.9326386 0.2935674 0.8253673
C 2.3891390 -0.0655995 2.1029864
C 1.9581765 1.6383018 0.4068627
C 2.8643478 0.9132545 2.9713890
H 2.3816398 -1.1079262 2.4168881
C 2.4258259 2.6178212 1.3169458
C 2.8763436 2.2536140 2.5924105
H 3.2267045 0.6312446 3.9612128
H 3.2362917 3.0082718 3.2894718
O 2.3769647 3.9002087 0.8710063
O 3.8287046 2.4777358 -1.3526739
C 2.8341949 4.9351634 1.7413069
H 2.7050285 5.8687223 1.1830649
H 2.2343563 4.9737390 2.6655193
H 3.8983561 4.8045028 1.9962266
C 4.8955507 2.9142585 -2.1942815
H 5.8120132 2.7542326 -1.6158034
H 4.9394155 2.3208996 -3.1222920
H 4.8010698 3.9840307 -2.4416022
C -2.8322069 -5.2299538 1.3924593
C -3.7874226 -4.3375831 1.7804620
C -2.7657678 -3.4942131 -0.0395152
N -2.2212210 -4.6983747 0.2717651
H -2.5491368 -6.1911237 1.8041408
H -4.5057394 -4.3764375 2.5901522
N -3.7343855 -3.2807150 0.8876886
C -4.5704628 -2.0748091 0.9594335
H -5.5511081 -2.3892189 1.3463603
H -4.7239578 -1.7223294 -0.0665864
C -3.9806390 -0.9740196 1.8168796
H -3.8647019 -0.0040764 1.3263122
C -3.6321148 -1.1191053 3.0965733
H -3.7289602 -2.0693162 3.6276609
H -3.2263952 -0.2819042 3.6647831
C -1.1485066 -5.3273321 -0.4912172
B -2.3415317 -2.5916788 -1.2747317
H -2.7504861 -3.0436096 -2.3249618
H -2.7608455 -1.3898138 -1.1534392
H -1.0463827 -2.6039422 -1.4072120
H -0.2363620 -4.7205657 -0.4264481
H -0.9523326 -6.3192395 -0.0719224
H -1.4489856 -5.4248278 -1.5418915

```

TsI\_IIR.xyz

98

Energy = -2817.826371612

Rh -0.9267181 -1.2251794 -0.2330337  
P 1.3441638 -1.2003148 -0.1354729  
P -0.9678903 1.0954230 -0.2205784  
C -2.4923733 1.6143684 -1.1107684  
C -3.4331202 2.4927174 -0.5584700  
C -2.7528980 1.0392112 -2.3676266  
C -4.6061288 2.7985413 -1.2554099  
H -3.2612348 2.9344922 0.4229715  
C -3.9154554 1.3577597 -3.0668516  
H -2.0396687 0.3291133 -2.7920266  
C -4.8482427 2.2387411 -2.5100489  
H -5.3317984 3.4819369 -0.8111168  
H -4.0978744 0.9127269 -4.0465464  
H -5.7621170 2.4840247 -3.0534359  
C 0.3987693 1.9550349 -1.1025405  
C 1.6888812 1.9281900 -0.5386456  
C 0.1832359 2.5618472 -2.3493381  
C 2.7600512 2.5041436 -1.2652793  
C 1.2491244 3.1350879 -3.0380653  
H -0.8173276 2.6018105 -2.7758810  
C 2.5382516 3.1036539 -2.5110020  
H 1.0747205 3.6141794 -4.0028447  
H 3.3617051 3.5451126 -3.0693913  
C -1.0296489 1.9973226 1.3781595  
C -0.9045658 3.3968598 1.3988609  
C -1.1954262 1.3043825 2.5840405  
C -0.9639320 4.0886804 2.6084372  
H -0.7455719 3.9443891 0.4681758  
C -1.2394683 1.9985422 3.7940077  
H -1.2785701 0.2176787 2.5734338  
C -1.1286023 3.3908054 3.8085503  
H -0.8726476 5.1762985 2.6136498  
H -1.3567471 1.4486559 4.7292427  
H -1.1680319 3.9330140 4.7549252  
C 2.3818212 -0.8284070 -1.6018232  
C 3.7783329 -0.7537555 -1.4617177  
C 1.8044354 -0.6038196 -2.8583863  
C 4.5807810 -0.4917722 -2.5716356  
H 4.2368629 -0.8857803 -0.4800143  
C 2.6096486 -0.3309312 -3.9645082  
H 0.7183473 -0.6036782 -2.9545662  
C 3.9984774 -0.2839494 -3.8254529  
H 5.6647535 -0.4425496 -2.4544966  
H 2.1490944 -0.1437948 -4.9356475  
H 4.6279767 -0.0765043 -4.6923902  
C 1.9354120 -2.8491826 0.4384499  
C 1.3232490 -3.4121056 1.5761110  
C 2.8810101 -3.6107772 -0.2622791  
C 1.6839911 -4.6812003 2.0242317

H 0.5379502 -2.8589513 2.0960633  
C 3.2294141 -4.8904992 0.1810305  
H 3.3468781 -3.2139722 -1.1637602  
C 2.6426388 -5.4244628 1.3279636  
H 1.2087804 -5.0952423 2.9151549  
H 3.9653103 -5.4698707 -0.3787828  
H 2.9215248 -6.4207964 1.6742780  
C 1.9526181 -0.0000529 1.1274283  
C 2.2983581 -0.4382614 2.4154968  
C 1.9770140 1.3753161 0.8166472  
C 2.6512522 0.4829796 3.3974661  
H 2.3165497 -1.4998045 2.6512667  
C 2.3343592 2.2939214 1.8360462  
C 2.6621292 1.8477806 3.1218556  
H 2.9244319 0.1327730 4.3940996  
H 2.9302747 2.5557661 3.9038792  
O 2.3156424 3.6031462 1.4750261  
O 3.9818917 2.4092693 -0.6781672  
C 2.6628991 4.5792695 2.4563118  
H 2.5823042 5.5474680 1.9502105  
H 1.9652337 4.5528025 3.3093614  
H 3.6951914 4.4380552 2.8154308  
C 5.1013065 2.9768725 -1.3569868  
H 5.9649650 2.7910820 -0.7092214  
H 5.2639118 2.4913612 -2.3333314  
H 4.9762778 4.0625289 -1.4994894  
C -5.6638964 -3.9886019 0.7535757  
C -4.6796510 -4.6512447 0.0836488  
C -3.8598422 -2.6409553 0.6652455  
N -5.1460392 -2.7571928 1.1012699  
H -6.6740070 -4.2872626 1.0073869  
H -4.6661653 -5.6416152 -0.3560202  
N -3.5818800 -3.8100196 0.0392656  
C -2.3093756 -4.2745293 -0.5737078  
H -2.6050769 -4.6922937 -1.5490787  
H -1.9864898 -5.1206483 0.0506548  
C -1.1067574 -3.3670420 -0.7683109  
H -0.2190176 -3.8494343 -0.3584824  
C -0.8877634 -2.5559348 -1.9121951  
H -1.7191264 -2.3287176 -2.5879674  
H 0.0876630 -2.5804958 -2.3996279  
C -5.8859571 -1.7138781 1.8068419  
B -2.9606411 -1.3566430 0.7878463  
H -3.5658067 -0.4025422 1.2116728  
H -1.9058089 -1.5797210 1.4552691  
H -2.6825541 -1.0673610 -0.4546582  
H -6.0078038 -0.8338430 1.1638139  
H -6.8701175 -2.1115527 2.0766551  
H -5.3500296 -1.4179924 2.7156693

TsII\_IIIR.xyz

98

Energy = -2817.814902887

Rh -1.3263971 0.1598186 0.5559311  
H -2.4232048 0.4611281 -1.7371843  
H -2.3980510 -0.9227128 0.9233367  
B -2.9121667 -0.3179932 -0.9378435  
H -2.9460617 -1.4706577 -1.3013339  
C -6.4569286 0.4295681 0.2048385  
C -5.8430839 1.6277837 0.4303507  
H -7.4829294 0.1190235 0.3625420  
H -6.2277511 2.5556220 0.8368710  
C -4.3008111 0.2192788 -0.4241919  
N -4.5298572 1.4822145 0.0336609  
N -5.4964336 -0.4226829 -0.3091938  
C -2.4046265 2.0513362 1.1711571  
C -2.5822432 1.0300536 2.1060550  
H -3.5409933 0.5209864 2.2046207  
H -1.9564984 0.9987839 3.0020075  
H -1.6594855 2.8269306 1.3578244  
P -0.1457212 -1.7552969 0.1409616  
P 0.4536774 1.6414713 -0.1858230  
C 1.3725373 -1.5023375 1.1577994  
C 2.4069626 -0.6606157 0.6911960  
C 1.4079674 -2.0055415 2.4689637  
C 3.4558386 -0.3256706 1.5849614  
C 2.4543907 -1.6679679 3.3223479  
H 0.6238698 -2.6743214 2.8192785  
C 3.4735699 -0.8203093 2.8951162  
H 2.4779335 -2.0703908 4.3363518  
H 4.2801651 -0.5566732 3.5768827  
C 1.7914437 0.9322065 -1.2250543  
C 2.0596947 1.4281006 -2.5101195  
C 2.5326868 -0.1480239 -0.7091239  
C 3.0499242 0.8410507 -3.2921788  
H 1.5052313 2.2801230 -2.8985912  
C 3.5363090 -0.7266581 -1.5243440  
C 3.7847719 -0.2406539 -2.8131685  
H 3.2548226 1.2314257 -4.2902705  
H 4.5505650 -0.6941395 -3.4398530  
C -3.4700722 2.4776611 0.1846964  
H -3.9478554 3.4120706 0.5184482  
H -3.0253893 2.6734712 -0.8026175  
C 0.4560281 -2.2647805 -1.5089242  
C 1.4611329 -3.2412555 -1.6163945  
C -0.1066693 -1.7197648 -2.6699179  
C 1.8862401 -3.6704603 -2.8729088  
H 1.9232044 -3.6515934 -0.7168367  
C 0.3322861 -2.1440925 -3.9253514  
H -0.8887362 -0.9648803 -2.5862754  
C 1.3242380 -3.1214489 -4.0291930  
H 2.6618263 -4.4346401 -2.9490245

H -0.1047833 -1.7098685 -4.8259156  
H 1.6617182 -3.4553671 -5.0117458  
C -0.9705366 -3.2707166 0.7975593  
C -1.6675386 -3.1895846 2.0170775  
C -0.9718706 -4.4892918 0.1044738  
C -2.3178439 -4.3044702 2.5434734  
H -1.7112262 -2.2381175 2.5504429  
C -1.6407155 -5.6011466 0.6249133  
H -0.4650662 -4.5774585 -0.8555628  
C -2.3072495 -5.5164672 1.8469459  
H -2.8415479 -4.2237806 3.4975685  
H -1.6382006 -6.5377930 0.0650559  
H -2.8237906 -6.3876073 2.2529779  
C -0.2383516 3.0279666 -1.1651759  
C -0.2779608 4.3422199 -0.6738276  
C -0.8879423 2.7386169 -2.3802347  
C -0.9448358 5.3441804 -1.3843700  
H 0.2166081 4.5894073 0.2665420  
C -1.5398162 3.7448115 -3.0934838  
H -0.8881917 1.7193126 -2.7684438  
C -1.5737170 5.0509243 -2.5958052  
H -0.9630540 6.3614356 -0.9896764  
H -2.0283807 3.5046376 -4.0392683  
H -2.0862304 5.8367813 -3.1526014  
C 1.3984526 2.4397515 1.1689445  
C 2.5005692 3.2641969 0.8885942  
C 1.0468280 2.1950762 2.5029764  
C 3.2172358 3.8534685 1.9292832  
H 2.8029876 3.4350602 -0.1463733  
C 1.7709813 2.7778363 3.5447926  
H 0.2203818 1.5173865 2.7259213  
C 2.8526453 3.6130646 3.2583326  
H 4.0694072 4.4967069 1.7033198  
H 1.4942090 2.5727026 4.5800197  
H 3.4176443 4.0733205 4.0707189  
O 4.4110659 0.4978197 1.0786896  
O 4.2069311 -1.7720045 -0.9695699  
C 5.2552487 -2.3770143 -1.7259223  
H 5.6575623 -3.1727571 -1.0895691  
H 4.8725378 -2.8143905 -2.6627266  
H 6.0527568 -1.6522473 -1.9565891  
C 5.4880896 0.8898453 1.9292353  
H 6.1201149 1.5449908 1.3198703  
H 5.1215081 1.4490762 2.8053249  
H 6.0759511 0.0188173 2.2613029  
C -5.7469347 -1.8071895 -0.6956218  
H -6.2282141 -1.8477828 -1.6819607  
H -4.7907860 -2.3373893 -0.7389789  
H -6.3998191 -2.2767145 0.0498494



TsIII\_IVR.xyz

98

Energy = -2817.807762450

Rh -1.2800227 0.1284238 0.6750147  
H -2.2874440 0.3836012 -1.8353805  
H -2.2967059 -0.8165762 1.5204802  
B -2.6725558 -0.3958200 -0.9882349  
H -2.5713489 -1.5647958 -1.2833061  
C -6.3483701 -0.1027637 -0.0995605  
C -5.8920448 1.1250738 0.2867553  
H -7.3442541 -0.5286881 -0.0724796  
H -6.4099548 1.9650408 0.7342713  
C -4.1347809 -0.0307872 -0.5290145  
N -4.5413912 1.1522653 0.0082319  
N -5.2577469 -0.8008918 -0.5843802  
C -2.5804580 1.7067231 1.3990919  
C -2.8171359 0.5230832 2.1720434  
H -3.8116526 0.0649784 2.1583178  
H -2.3448695 0.4558629 3.1574183  
H -1.9919861 2.5090395 1.8502969  
P -0.0233416 -1.7402120 0.1990748  
P 0.2503502 1.6605600 -0.2340018  
C 1.5198754 -1.3769011 1.1426596  
C 2.4519424 -0.4574083 0.6097561  
C 1.6764275 -1.8672413 2.4492035  
C 3.5272125 -0.0391277 1.4348118  
C 2.7438766 -1.4425346 3.2351854  
H 0.9743290 -2.5982645 2.8462689  
C 3.6644590 -0.5207134 2.7426443  
H 2.8634812 -1.8355170 4.2461666  
H 4.4883614 -0.1894928 3.3721348  
C 1.6136579 1.0556186 -1.3035154  
C 1.7886690 1.5485049 -2.6054560  
C 2.4600468 0.0453300 -0.8020495  
C 2.7870635 1.0268170 -3.4226493  
H 1.1573339 2.3522040 -2.9787808  
C 3.4683981 -0.4684810 -1.6561936  
C 3.6210978 0.0115930 -2.9621509  
H 2.9190053 1.4157082 -4.4335348  
H 4.3901424 -0.3949847 -3.6163484  
C -3.6041206 2.2076962 0.3951657  
H -4.2039032 3.0302782 0.8153110  
H -3.1110327 2.5909473 -0.5110139  
O 4.3860184 0.8491651 0.8676745  
O 4.2441789 -1.4469993 -1.1186373  
C 5.4923651 1.3102424 1.6417745  
H 6.0395005 2.0008005 0.9906802  
H 5.1536237 1.8487207 2.5419272  
H 6.1542151 0.4783502 1.9324013  
C 5.2923487 -1.9922297 -1.9188497  
H 5.7828589 -2.7437411 -1.2906486  
H 4.8929048 -2.4760014 -2.8253238

H 6.0230562 -1.2181754 -2.2043574  
C -5.3149683 -2.1577897 -1.1203365  
H -5.3797420 -2.1360488 -2.2160201  
H -4.4095396 -2.7000494 -0.8283568  
H -6.1987005 -2.6598775 -0.7112345  
C -0.5385434 3.0571364 -1.1195351  
C -0.6680035 4.3186560 -0.5150986  
C -1.1809445 2.8303406 -2.3517200  
C -1.4069995 5.3298906 -1.1337054  
H -0.1875915 4.5167703 0.4435707  
C -1.9088326 3.8472534 -2.9713134  
H -1.1212618 1.8513855 -2.8271875  
C -2.0257226 5.1002725 -2.3642084  
H -1.4909887 6.3052354 -0.6514641  
H -2.3901814 3.6553744 -3.9316742  
H -2.5958681 5.8940640 -2.8490948  
C 1.1723253 2.4542329 1.1435191  
C 0.8525307 2.1609036 2.4764833  
C 2.2275564 3.3399637 0.8715011  
C 1.5635566 2.7496217 3.5233626  
H 0.0585998 1.4431257 2.6979019  
C 2.9285681 3.9386743 1.9177093  
H 2.5054049 3.5535445 -0.1623164  
C 2.5981625 3.6451668 3.2445951  
H 1.3135016 2.5031541 4.5563141  
H 3.7425009 4.6311888 1.6964918  
H 3.1514942 4.1119372 4.0612456  
C -0.7479947 -3.2925786 0.8897591  
C -0.8246558 -4.4809649 0.1489793  
C -1.3278104 -3.2659770 2.1711841  
C -1.4485048 -5.6133432 0.6818209  
H -0.4085106 -4.5289037 -0.8564676  
C -1.9287538 -4.4016747 2.7110544  
H -1.3189882 -2.3409168 2.7509422  
C -1.9927872 -5.5824785 1.9651699  
H -1.5047743 -6.5245191 0.0838959  
H -2.3567915 -4.3618690 3.7141957  
H -2.4719040 -6.4698402 2.3816879  
C 0.5976582 -2.2630997 -1.4456139  
C 0.0672433 -1.7424771 -2.6327275  
C 1.6213121 -3.2246807 -1.5096322  
C 0.5524825 -2.1782186 -3.8669288  
H -0.7204718 -0.9920393 -2.5887000  
C 2.0921771 -3.6673966 -2.7450351  
H 2.0593954 -3.6178290 -0.5904814  
C 1.5596741 -3.1436299 -3.9265403  
H 0.1411564 -1.7589977 -4.7865716  
H 2.8808769 -4.4208637 -2.7839663  
H 1.9319512 -3.4870727 -4.8932114

TsIV\_VR.xyz

98

Energy = -2817.821604328

|    |            |            |            |
|----|------------|------------|------------|
| Rh | -0.3703105 | 1.5422601  | 0.3906698  |
| H  | 2.3952015  | 1.2910961  | 1.0605786  |
| H  | -0.9688263 | 3.7498269  | -0.0718973 |
| B  | 1.5194750  | 2.1322788  | 1.1511192  |
| H  | 1.5577781  | 2.9803002  | 0.2566787  |
| C  | 2.4568401  | 3.7512482  | 4.4350481  |
| C  | 1.1024332  | 3.7253734  | 4.5886507  |
| H  | 3.2378012  | 4.1371989  | 5.0795434  |
| H  | 0.4745430  | 4.0611600  | 5.4050242  |
| C  | 1.5701084  | 2.7983837  | 2.5901868  |
| N  | 0.5793458  | 3.1451746  | 3.4484749  |
| N  | 2.7261200  | 3.1772074  | 3.2075228  |
| C  | -1.2895597 | 2.6976218  | 1.8445431  |
| C  | -1.1860768 | 3.9696967  | 1.0032428  |
| H  | -0.3682365 | 4.6250142  | 1.3334166  |
| H  | -2.1252449 | 4.5461512  | 0.9776574  |
| H  | -2.3287548 | 2.3271643  | 1.8793601  |
| P  | 0.1675041  | 0.7703191  | -1.7927056 |
| P  | -0.5412795 | -0.4429932 | 1.2863407  |
| C  | -1.0766451 | -0.5159056 | -2.2264115 |
| C  | -0.9520621 | -1.7738120 | -1.6025168 |
| C  | -2.1718172 | -0.2425956 | -3.0586174 |
| C  | -1.9535028 | -2.7472506 | -1.8351871 |
| C  | -3.1489800 | -1.2136094 | -3.2655354 |
| H  | -2.2524548 | 0.7197222  | -3.5617240 |
| C  | -3.0536658 | -2.4613898 | -2.6535399 |
| H  | -3.9964795 | -0.9988456 | -3.9185613 |
| H  | -3.8281064 | -3.2072629 | -2.8230994 |
| C  | 0.5157452  | -1.7428631 | 0.5181026  |
| C  | 1.6337125  | -2.2429509 | 1.2051592  |
| C  | 0.2419704  | -2.1770859 | -0.7980807 |
| C  | 2.4926225  | -3.1474027 | 0.5883881  |
| H  | 1.8265267  | -1.9479782 | 2.2332047  |
| C  | 1.1302289  | -3.1052894 | -1.4003518 |
| C  | 2.2563620  | -3.5752310 | -0.7149311 |
| H  | 3.3582370  | -3.5289580 | 1.1321458  |
| H  | 2.9423779  | -4.2754728 | -1.1879573 |
| C  | -0.8496484 | 2.8350250  | 3.2809836  |
| H  | -1.3938173 | 3.6492703  | 3.7927446  |
| H  | -1.0551618 | 1.9057697  | 3.8324253  |
| C  | 4.0521534  | 3.0272042  | 2.6197744  |
| H  | 4.2673332  | 1.9656558  | 2.4434599  |
| H  | 4.1022298  | 3.5590919  | 1.6614641  |
| H  | 4.7929701  | 3.4446553  | 3.3098612  |
| C  | 1.7335514  | 0.0724555  | -2.4375519 |
| C  | 1.7544759  | -0.6024711 | -3.6693885 |
| C  | 2.9245921  | 0.2402159  | -1.7191567 |
| C  | 2.9566181  | -1.0970648 | -4.1743723 |
| H  | 0.8281140  | -0.7485238 | -4.2275454 |

|   |            |            |            |
|---|------------|------------|------------|
| C | 4.1237075  | -0.2664232 | -2.2244980 |
| H | 2.9053338  | 0.7573712  | -0.7601504 |
| C | 4.1424133  | -0.9336281 | -3.4511559 |
| H | 2.9674679  | -1.6136380 | -5.1359067 |
| H | 5.0470203  | -0.1398733 | -1.6566328 |
| H | 5.0813717  | -1.3243235 | -3.8472344 |
| C | -0.1719936 | 2.1903672  | -2.9115011 |
| C | -1.3618902 | 2.9211034  | -2.7299313 |
| C | 0.7539971  | 2.6384403  | -3.8644119 |
| C | -1.6283727 | 4.0545787  | -3.4962150 |
| H | -2.0945420 | 2.5945984  | -1.9865492 |
| C | 0.4914285  | 3.7836209  | -4.6214284 |
| H | 1.6874683  | 2.0961932  | -4.0157327 |
| C | -0.6980857 | 4.4912728  | -4.4442423 |
| H | -2.5616948 | 4.6008349  | -3.3500643 |
| H | 1.2243138  | 4.1210517  | -5.3561282 |
| H | -0.9006661 | 5.3824690  | -5.0399848 |
| C | -2.2369691 | -1.1282637 | 1.1346670  |
| C | -2.4867595 | -2.4648801 | 1.4867091  |
| C | -3.2953110 | -0.3252977 | 0.6880454  |
| C | -3.7807029 | -2.9783061 | 1.4065917  |
| H | -1.6664581 | -3.1057963 | 1.8144544  |
| C | -4.5858555 | -0.8467187 | 0.5919248  |
| H | -3.1031940 | 0.7093457  | 0.3969844  |
| C | -4.8308798 | -2.1724890 | 0.9566224  |
| H | -3.9682507 | -4.0150466 | 1.6913532  |
| H | -5.4001839 | -0.2177610 | 0.2295426  |
| H | -5.8411447 | -2.5794031 | 0.8891054  |
| C | -0.2098998 | -0.5082635 | 3.0988318  |
| C | -1.2321419 | -0.7982072 | 4.0173005  |
| C | 1.0550956  | -0.1418889 | 3.5951402  |
| C | -0.9915294 | -0.7334077 | 5.3926310  |
| H | -2.2265434 | -1.0693394 | 3.6639524  |
| C | 1.2945521  | -0.0888322 | 4.9677427  |
| H | 1.8526624  | 0.1209471  | 2.9004014  |
| C | 0.2705466  | -0.3817460 | 5.8729157  |
| H | -1.7998830 | -0.9609690 | 6.0893603  |
| H | 2.2846958  | 0.1912582  | 5.3316827  |
| H | 0.4564045  | -0.3350261 | 6.9469906  |
| O | 0.8137002  | -3.4767411 | -2.6680910 |
| O | -1.7675929 | -3.9397251 | -1.2081795 |
| C | -2.7127865 | -4.9812535 | -1.4482675 |
| H | -2.3543033 | -5.8436577 | -0.8755439 |
| H | -3.7183002 | -4.6994765 | -1.0946865 |
| H | -2.7570202 | -5.2431172 | -2.5177454 |
| C | 1.6592495  | -4.4184056 | -3.3277966 |
| H | 1.2076257  | -4.5798264 | -4.3126943 |
| H | 2.6788188  | -4.0189019 | -3.4538065 |
| H | 1.6987396  | -5.3744044 | -2.7810113 |

TsV\_VIR.xyz

98

Energy = -2817.811676430

Rh -1.2776399 -0.2423866 0.1911438  
H -2.8597237 -0.5271446 -1.7295509  
H -2.3788431 -0.0540383 2.8863750  
B -3.1514919 -0.6128365 -0.5458640  
H -2.5775566 -1.5707111 0.1094034  
C -6.9406085 -0.5327320 -0.4723688  
C -6.5770097 0.6878098 0.0278911  
H -7.9196438 -0.9558707 -0.6645606  
H -7.1784861 1.5329742 0.3404388  
C -4.7042869 -0.4844153 -0.3597291  
N -5.1995329 0.6851758 0.0884472  
N -5.7713632 -1.2384628 -0.7145099  
C -2.9913248 0.9889021 1.0741170  
C -3.3008293 0.2888844 2.3970985  
H -3.9418934 -0.5960231 2.2669610  
H -3.8142397 0.9715290 3.0997845  
H -2.2768417 1.8040882 1.2566605  
P 0.4888278 -1.6651509 0.2148610  
P 0.0519045 1.5190734 -0.1380900  
C 1.9548204 -1.0357525 1.1259186  
C 2.7308052 -0.0083042 0.5525994  
C 2.2111123 -1.4756964 2.4335819  
C 3.7599170 0.5748164 1.3320866  
C 3.2326752 -0.8909249 3.1769454  
H 1.6183677 -2.2795430 2.8675236  
C 4.0043085 0.1372081 2.6398669  
H 3.4324149 -1.2391832 4.1915647  
H 4.7928600 0.5899590 3.2382542  
C 1.4648296 1.2498301 -1.2833522  
C 1.4074581 1.7214825 -2.6040021  
C 2.5586280 0.4721496 -0.8513668  
C 2.4257117 1.4111621 -3.5007587  
H 0.5759217 2.3426580 -2.9309027  
C 3.5776149 0.1632405 -1.7858286  
C 3.5064803 0.6266814 -3.1052750  
H 2.3782574 1.7846162 -4.5248818  
H 4.2891385 0.3842477 -3.8218633  
C -4.2237582 1.6975147 0.5156444  
H -4.7070736 2.3219747 1.2858224  
H -3.9713412 2.3366760 -0.3438610  
C -5.6857144 -2.5990467 -1.2315865  
H -4.6885592 -2.7487791 -1.6612145  
H -5.8466330 -3.3287751 -0.4267322  
H -6.4413983 -2.7427394 -2.0127757  
C -0.0198700 -3.1893149 1.1103078  
C 0.2947308 -4.4821720 0.6686246  
C -0.7950940 -3.0361047 2.2735597  
C -0.1489430 -5.5974374 1.3840766  
H 0.8788577 -4.6251107 -0.2405557

C -1.2262672 -4.1503587 2.9920580  
H -1.0630984 -2.0311672 2.6084997  
C -0.9042005 -5.4358190 2.5469364  
H 0.0995535 -6.5984375 1.0275382  
H -1.8194307 -4.0151224 3.8980879  
H -1.2458586 -6.3098208 3.1037755  
C 1.1473907 -2.2602160 -1.3846504  
C 2.3763071 -2.9361130 -1.4563561  
C 0.3984545 -2.0579667 -2.5519310  
C 2.8401020 -3.4115491 -2.6829818  
H 2.9788156 -3.0714627 -0.5564426  
C 0.8718955 -2.5257993 -3.7785590  
H -0.5479489 -1.5157472 -2.4886793  
C 2.0908326 -3.2050206 -3.8451104  
H 3.7929940 -3.9416767 -2.7320424  
H 0.2898353 -2.3557669 -4.6857612  
H 2.4595934 -3.5723663 -4.8043010  
C 0.8194532 2.3253535 1.3174838  
C 1.7790691 3.3385020 1.1559160  
C 0.4349245 1.9373171 2.6079890  
C 2.3298873 3.9623911 2.2749955  
H 2.1057021 3.6270030 0.1551691  
C 0.9974130 2.5553166 3.7257233  
H -0.2879393 1.1268202 2.7244354  
C 1.9416663 3.5711598 3.5603506  
H 3.0702541 4.7534973 2.1432051  
H 0.7025970 2.2384638 4.7273002  
H 2.3794920 4.0572301 4.4338668  
C -0.9655946 2.8442255 -0.9176839  
C -1.0645729 4.1376413 -0.3857265  
C -1.7450802 2.5103006 -2.0405850  
C -1.9162803 5.0798979 -0.9714556  
H -0.4827925 4.4151824 0.4933880  
C -2.5772099 3.4580745 -2.6349018  
H -1.7102198 1.4933590 -2.4356965  
C -2.6674430 4.7473017 -2.0991284  
H -1.9863845 6.0805138 -0.5417326  
H -3.1634434 3.1868058 -3.5147245  
H -3.3245173 5.4873964 -2.5585929  
O 4.4530702 1.5770744 0.7292202  
O 4.5879046 -0.6139700 -1.3130121  
C 5.6522075 -0.9503603 -2.2021378  
H 6.3431080 -1.5661687 -1.6160209  
H 5.2846743 -1.5306542 -3.0644966  
H 6.1768342 -0.0494260 -2.5595043  
C 5.5049285 2.2040955 1.4616587  
H 5.9187044 2.9652957 0.7911752  
H 5.1220702 2.6887710 2.3749109  
H 6.2940725 1.4826237 1.7286660

|                          |            |            |            |   |            |            |            |
|--------------------------|------------|------------|------------|---|------------|------------|------------|
| Ts0_IS.xyz               |            |            |            | H | -2.1137955 | -0.7892498 | 2.1879028  |
| 98                       |            |            |            | C | -2.4183234 | -4.5782280 | 1.4084834  |
| Energy = -2817.813326731 |            |            |            | H | -0.9230163 | -4.2382768 | -0.1063158 |
| Rh                       | -1.3395639 | 0.5588740  | -0.3145181 | C | -3.1991464 | -4.0162566 | 2.4210756  |
| P                        | -0.2585004 | -1.2917597 | 0.0506545  | H | -3.6936404 | -2.2034806 | 3.4951691  |
| P                        | 0.5677161  | 1.7219159  | -0.3506499 | H | -2.5055213 | -5.6409553 | 1.1761031  |
| C                        | 0.1456049  | 3.2831862  | -1.2254804 | H | -3.8954725 | -4.6392375 | 2.9849523  |
| C                        | 0.5224765  | 4.5537482  | -0.7661230 | C | 1.2465399  | -1.2114179 | 1.1019297  |
| C                        | -0.6925164 | 3.1858930  | -2.3531670 | C | 1.1899590  | -1.6263593 | 2.4421766  |
| C                        | 0.0765729  | 5.7015821  | -1.4257571 | C | 2.4195365  | -0.6258992 | 0.5848021  |
| H                        | 1.1562808  | 4.6534443  | 0.1152964  | C | 2.2966596  | -1.4582526 | 3.2697321  |
| C                        | -1.1301508 | 4.3342304  | -3.0123802 | H | 0.2872504  | -2.0900632 | 2.8365386  |
| H                        | -1.0085484 | 2.2003319  | -2.7056987 | C | 3.5255607  | -0.4479959 | 1.4523817  |
| C                        | -0.7474355 | 5.5960625  | -2.5484321 | C | 3.4618017  | -0.8653514 | 2.7880025  |
| H                        | 0.3758938  | 6.6841145  | -1.0571554 | H | 2.2527546  | -1.7906050 | 4.3081309  |
| H                        | -1.7752212 | 4.2423611  | -3.8876795 | H | 4.3124873  | -0.7281654 | 3.4531489  |
| H                        | -1.0930586 | 6.4956887  | -3.0600522 | O | 4.6054430  | 0.1663791  | 0.9037266  |
| C                        | 1.8655413  | 0.9123190  | -1.3701204 | O | 4.0643856  | -1.9725295 | -1.1049419 |
| C                        | 2.5594551  | -0.1911642 | -0.8356744 | C | 5.7533980  | 0.3748999  | 1.7258902  |
| C                        | 2.0759376  | 1.3091323  | -2.6991428 | H | 6.4905785  | 0.8687173  | 1.0835008  |
| C                        | 3.4535827  | -0.8996921 | -1.6744912 | H | 5.5170860  | 1.0274691  | 2.5824437  |
| C                        | 2.9667384  | 0.6018325  | -3.5020050 | H | 6.1656627  | -0.5800447 | 2.0899778  |
| H                        | 1.5524114  | 2.1733751  | -3.1045391 | C | 4.9826002  | -2.7239216 | -1.8980306 |
| C                        | 3.6511195  | -0.5049814 | -3.0035592 | H | 5.3510332  | -3.5233594 | -1.2458280 |
| H                        | 3.1317179  | 0.9150839  | -4.5340960 | H | 4.4832088  | -3.1669824 | -2.7753168 |
| H                        | 4.3359061  | -1.0518674 | -3.6491614 | H | 5.8296406  | -2.1017232 | -2.2295151 |
| C                        | 1.4659964  | 2.2440602  | 1.1599395  | C | -6.1488723 | -1.0762027 | 1.2167684  |
| C                        | 2.7254200  | 2.8604855  | 1.0777365  | C | -5.9902758 | 0.2070794  | 1.6496671  |
| C                        | 0.8880355  | 2.0216913  | 2.4172930  | C | -4.6225551 | -0.0925651 | -0.1193867 |
| C                        | 3.3802787  | 3.2695767  | 2.2394851  | N | -5.3092394 | -1.2384554 | 0.1299955  |
| H                        | 3.2006354  | 3.0034501  | 0.1053824  | H | -6.7847314 | -1.8740647 | 1.5807920  |
| C                        | 1.5506246  | 2.4214365  | 3.5784916  | H | -6.4722131 | 0.7500922  | 2.4539475  |
| H                        | -0.0705638 | 1.5002399  | 2.4735657  | N | -5.0520877 | 0.7918303  | 0.8183675  |
| C                        | 2.7941702  | 3.0517004  | 3.4902927  | C | -4.5610555 | 2.1681385  | 0.9230499  |
| H                        | 4.3553107  | 3.7549355  | 2.1683838  | H | -5.2516511 | 2.6951383  | 1.5996400  |
| H                        | 1.1003598  | 2.2322777  | 4.5542217  | H | -4.6366289 | 2.6434645  | -0.0647743 |
| H                        | 3.3113191  | 3.3682807  | 4.3976025  | C | -3.1571119 | 2.2699204  | 1.4499258  |
| C                        | 0.2761536  | -2.2590012 | -1.4106691 | H | -2.9182970 | 1.6596167  | 2.3264977  |
| C                        | 1.1599330  | -3.3425119 | -1.2723029 | C | -2.2739274 | 3.1643019  | 0.9812551  |
| C                        | -0.2164598 | -1.9245483 | -2.6797494 | H | -2.5054178 | 3.8016256  | 0.1248878  |
| C                        | 1.5307462  | -4.0877072 | -2.3916762 | H | -1.3142613 | 3.3268818  | 1.4684907  |
| H                        | 1.5766734  | -3.5880077 | -0.2938348 | C | -5.1172922 | -2.4885984 | -0.5954907 |
| C                        | 0.1669039  | -2.6661809 | -3.7979936 | B | -3.5125932 | 0.1306460  | -1.2247471 |
| H                        | -0.8854451 | -1.0669233 | -2.7793569 | H | -3.8082904 | -0.3993203 | -2.2762027 |
| C                        | 1.0374253  | -3.7494923 | -3.6553044 | H | -3.2098752 | 1.3119886  | -1.3770480 |
| H                        | 2.2146092  | -4.9306739 | -2.2772122 | H | -2.5152162 | -0.6285135 | -0.8929276 |
| H                        | -0.2114158 | -2.3935548 | -4.7844429 | H | -4.2949574 | -3.0617373 | -0.1458306 |
| H                        | 1.3358550  | -4.3292927 | -4.5304197 | H | -6.0422797 | -3.0740880 | -0.5505554 |
| C                        | -1.3953962 | -2.4195805 | 0.9711010  | H | -4.8725418 | -2.2613288 | -1.6382127 |
| C                        | -2.1945160 | -1.8601768 | 1.9837262  |   |            |            |            |
| C                        | -1.5199065 | -3.7866063 | 0.6863073  |   |            |            |            |
| C                        | -3.0845287 | -2.6522204 | 2.7084629  |   |            |            |            |

|             |            |            |            |   |            |            |            |
|-------------|------------|------------|------------|---|------------|------------|------------|
| Ts0_IIS.xyz |            |            |            | H | 0.5445160  | -2.5584018 | 2.2205501  |
| 98          |            |            |            | C | 3.0733298  | -4.6292555 | 0.1324757  |
| Energy =    |            |            |            | H | 3.1184802  | -2.9543619 | -1.2204886 |
| Rh          | -0.9535348 | -0.9199743 | -0.2173308 | C | 2.5534830  | -5.1568103 | 1.3140319  |
| P           | 1.2232871  | -0.9285512 | -0.0998332 | H | 1.2389793  | -4.8072799 | 2.9969990  |
| P           | -0.9903889 | 1.3096282  | -0.1223800 | H | 3.7679740  | -5.2155070 | -0.4713195 |
| C           | -2.6041486 | 1.8503875  | -0.8191199 | H | 2.8433906  | -6.1559869 | 1.6429735  |
| C           | -3.5085308 | 2.6575217  | -0.1135195 | C | 2.0226638  | 0.2806194  | 1.0313252  |
| C           | -2.9685907 | 1.3657469  | -2.0892147 | C | 2.5057644  | -0.1484109 | 2.2786774  |
| C           | -4.7441068 | 2.9892876  | -0.6762345 | C | 2.0281573  | 1.6519075  | 0.7011304  |
| H           | -3.2521036 | 3.0299217  | 0.8786364  | C | 2.9753151  | 0.7777478  | 3.2044867  |
| C           | -4.1929606 | 1.7166034  | -2.6564717 | H | 2.5330778  | -1.2085473 | 2.5214851  |
| H           | -2.2890053 | 0.7014606  | -2.6280869 | C | 2.4901311  | 2.5769754  | 1.6714734  |
| C           | -5.0852277 | 2.5292022  | -1.9497339 | C | 2.9572584  | 2.1405010  | 2.9170522  |
| H           | -5.4394424 | 3.6165843  | -0.1159879 | H | 3.3586412  | 0.4353480  | 4.1670066  |
| H           | -4.4564703 | 1.3461619  | -3.6484154 | H | 3.3118977  | 2.8542107  | 3.6583932  |
| H           | -6.0469773 | 2.7982328  | -2.3892274 | O | 2.4237762  | 3.8853886  | 1.3095651  |
| C           | 0.2815649  | 2.2291809  | -1.0778424 | O | 3.8906663  | 2.6597194  | -0.9783599 |
| C           | 1.6154797  | 2.1975238  | -0.6263255 | C | 2.8817863  | 4.8662947  | 2.2393954  |
| C           | -0.0423082 | 2.8456426  | -2.2958219 | H | 2.7416733  | 5.8323396  | 1.7423249  |
| C           | 2.6195077  | 2.7651824  | -1.4495724 | H | 2.2897099  | 4.8427493  | 3.1691963  |
| C           | 0.9595387  | 3.4139148  | -3.0771772 | H | 3.9489919  | 4.7274174  | 2.4768698  |
| H           | -1.0767184 | 2.8939333  | -2.6304276 | C | 4.9477525  | 3.2129289  | -1.7613840 |
| C           | 2.2910275  | 3.3660223  | -2.6705566 | H | 5.8668634  | 3.0140420  | -1.1994444 |
| H           | 0.7021754  | 3.8986355  | -4.0202130 | H | 5.0094073  | 2.7278934  | -2.7494865 |
| H           | 3.0644157  | 3.8009760  | -3.3010123 | H | 4.8251560  | 4.3004838  | -1.8910904 |
| C           | -0.9202203 | 2.0774835  | 1.5421005  | C | -4.1332933 | -5.5522889 | 0.6267827  |
| C           | -0.8000025 | 3.4684537  | 1.6917558  | C | -4.3222979 | -4.5075824 | 1.4809175  |
| C           | -0.9897791 | 1.2648920  | 2.6816374  | C | -2.7388520 | -3.8942615 | -0.0114500 |
| C           | -0.7642053 | 4.0330252  | 2.9669814  | N | -3.1604587 | -5.1618873 | -0.2743732 |
| H           | -0.7147076 | 4.1070904  | 0.8106476  | H | -4.6019318 | -6.5282285 | 0.5874103  |
| C           | -0.9431755 | 1.8311621  | 3.9560536  | H | -4.9909172 | -4.3938675 | 2.3257341  |
| H           | -1.0438507 | 0.1808548  | 2.5485083  | N | -3.4571059 | -3.5043997 | 1.0836700  |
| C           | -0.8340432 | 3.2164931  | 4.0999277  | C | -3.2972968 | -2.2367120 | 1.7903220  |
| H           | -0.6737962 | 5.1151978  | 3.0768488  | H | -2.2173855 | -2.0768717 | 1.9643049  |
| H           | -0.9818441 | 1.1904241  | 4.8385680  | H | -3.7681740 | -2.3546697 | 2.7788904  |
| H           | -0.7977927 | 3.6608536  | 5.0960002  | C | -3.8639511 | -1.0332607 | 1.0876803  |
| C           | 2.0642990  | -0.6712432 | -1.7069812 | H | -3.6964431 | -0.0924410 | 1.6205367  |
| C           | 3.4491131  | -0.4419368 | -1.7553976 | C | -4.5388554 | -1.0356724 | -0.0647238 |
| C           | 1.3299588  | -0.7412984 | -2.8982532 | H | -4.7228400 | -1.9532471 | -0.6263209 |
| C           | 4.0862414  | -0.2869000 | -2.9864001 | H | -4.9198209 | -0.1089832 | -0.4924297 |
| H           | 4.0247058  | -0.3675766 | -0.8311550 | C | -2.6180402 | -6.0156875 | -1.3282389 |
| C           | 1.9700815  | -0.5715455 | -4.1265688 | B | -1.6534590 | -3.0809229 | -0.8260889 |
| H           | 0.2528083  | -0.9174931 | -2.8449087 | H | -1.0275078 | -3.7875614 | -1.5794206 |
| C           | 3.3478293  | -0.3455374 | -4.1721890 | H | -2.1570594 | -2.1221755 | -1.4494470 |
| H           | 5.1634511  | -0.1141931 | -3.0190484 | H | -0.8293473 | -2.6799292 | 0.0771333  |
| H           | 1.3910698  | -0.6149142 | -5.0503873 | H | -1.5524938 | -6.2021281 | -1.1468767 |
| H           | 3.8479670  | -0.2148614 | -5.1333132 | H | -3.1636865 | -6.9651973 | -1.3198145 |
| C           | 1.8085398  | -2.5831161 | 0.4633549  | H | -2.7319378 | -5.5326908 | -2.3049629 |
| C           | 1.2744454  | -3.1308876 | 1.6437331  |   |            |            |            |
| C           | 2.7080335  | -3.3477970 | -0.2910276 |   |            |            |            |
| C           | 1.6527042  | -4.4011939 | 2.0723075  |   |            |            |            |

|                          |            |            |  |   |            |            |            |
|--------------------------|------------|------------|--|---|------------|------------|------------|
| TsI_IIS.xyz              |            |            |  | H | 0.7670285  | -2.1233558 | 3.0114198  |
| 98                       |            |            |  | C | 2.9644987  | -4.7964085 | 1.2547224  |
| Energy = -2817.813667560 |            |            |  | H | 3.0212242  | -3.4483703 | -0.4257438 |
| Rh -0.9239923            | -1.2463406 | 0.6474607  |  | C | 2.4999404  | -5.0208892 | 2.5512860  |
| P 1.3226055              | -1.1131458 | 0.3388530  |  | H | 1.3477949  | -4.2203895 | 4.1982974  |
| P -1.0952678             | 0.9863348  | 0.3850503  |  | H | 3.5733741  | -5.5501740 | 0.7530572  |
| C -2.8210487             | 1.2571579  | -0.1966342 |  | H | 2.7464079  | -5.9492954 | 3.0686855  |
| C -3.7051297             | 2.1483923  | 0.4281533  |  | C | 2.0848013  | 0.3084764  | 1.2241158  |
| C -3.2985572             | 0.4498870  | -1.2460550 |  | C | 2.7262009  | 0.1422450  | 2.4604375  |
| C -5.0335053             | 2.2405464  | 0.0021843  |  | C | 1.9644083  | 1.5889730  | 0.6485488  |
| H -3.3643680             | 2.7697338  | 1.2563260  |  | C | 3.2377470  | 1.2519982  | 3.1302886  |
| C -4.6204549             | 0.5544244  | -1.6757589 |  | H | 2.8475397  | -0.8506424 | 2.8896050  |
| H -2.6262830             | -0.2712118 | -1.7149020 |  | C | 2.4767502  | 2.7030874  | 1.3560411  |
| C -5.4937353             | 1.4502726  | -1.0516478 |  | C | 3.1114726  | 2.5311027  | 2.5932811  |
| H -5.7092722             | 2.9380135  | 0.4997645  |  | H | 3.7459733  | 1.1190709  | 4.0867147  |
| H -4.9727304             | -0.0716698 | -2.4973693 |  | H | 3.5082382  | 3.3866439  | 3.1369058  |
| H -6.5298674             | 1.5294230  | -1.3843237 |  | O | 2.2896143  | 3.9093367  | 0.7616377  |
| C -0.0181882             | 1.6500296  | -0.9550767 |  | O | 3.5213511  | 2.3357235  | -1.4376232 |
| C 1.3577845              | 1.8133079  | -0.6951686 |  | C | 2.7766606  | 5.0735352  | 1.4283019  |
| C -0.5334426             | 1.9158038  | -2.2328293 |  | H | 2.5198177  | 5.9157370  | 0.7766535  |
| C 2.2051167              | 2.2281225  | -1.7516835 |  | H | 2.2877180  | 5.2054895  | 2.4074537  |
| C 0.3185422              | 2.3312429  | -3.2538731 |  | H | 3.8698783  | 5.0328526  | 1.5608545  |
| H -1.5993585             | 1.8194516  | -2.4289669 |  | C | 4.4320952  | 2.7256056  | -2.4651711 |
| C 1.6842097              | 2.4822464  | -3.0271070 |  | H | 5.4202661  | 2.7407041  | -1.9926540 |
| H -0.0880248             | 2.5440829  | -4.2439397 |  | H | 4.4332477  | 1.9976608  | -3.2927516 |
| H 2.3357411              | 2.7984226  | -3.8396573 |  | H | 4.1956332  | 3.7301183  | -2.8517922 |
| C -0.8427644             | 2.2090543  | 1.7288073  |  | C | -4.9637477 | -3.2172329 | -2.0609196 |
| C -0.9380666             | 3.5828493  | 1.4482166  |  | C | -5.1189409 | -3.1133514 | -0.7124074 |
| C -0.5255095             | 1.7951087  | 3.0285933  |  | C | -2.9061132 | -3.0771747 | -1.1394028 |
| C -0.7552838             | 4.5201684  | 2.4645083  |  | N | -3.6024674 | -3.1937713 | -2.3046046 |
| H -1.1418070             | 3.9196631  | 0.4299641  |  | H | -5.6948319 | -3.3012819 | -2.8561499 |
| C -0.3297703             | 2.7349558  | 4.0407999  |  | H | -6.0120865 | -3.0979850 | -0.0997050 |
| H -0.3864189             | 0.7339375  | 3.2333008  |  | N | -3.8482792 | -3.0227792 | -0.1670922 |
| C -0.4546305             | 4.0980328  | 3.7630418  |  | C | -3.6075736 | -3.0585563 | 1.2847553  |
| H -0.8381038             | 5.5846920  | 2.2388565  |  | H | -3.5063712 | -4.1166726 | 1.5679997  |
| H -0.0682544             | 2.4015395  | 5.0461363  |  | H | -4.5348011 | -2.6865408 | 1.7439560  |
| H -0.3087084             | 4.8332140  | 4.5562558  |  | C | -2.4187729 | -2.3014818 | 1.8468098  |
| C 2.2769514              | -1.1203501 | -1.2310431 |  | H | -1.7454648 | -2.9508845 | 2.4159036  |
| C 3.6690899              | -0.9299315 | -1.1783697 |  | C | -2.4472944 | -0.9492357 | 2.2218093  |
| C 1.6555026              | -1.3152915 | -2.4697996 |  | H | -3.2912199 | -0.3191647 | 1.9299310  |
| C 4.4241312              | -0.9522310 | -2.3501290 |  | H | -1.9200924 | -0.6233140 | 3.1171577  |
| H 4.1615706              | -0.7543460 | -0.2202342 |  | C | -2.9767706 | -3.2462863 | -3.6190145 |
| C 2.4136636              | -1.3224542 | -3.6420982 |  | B | -1.3319585 | -2.9113817 | -1.1072462 |
| H 0.5765857              | -1.4533108 | -2.5140416 |  | H | -0.7607128 | -3.8938486 | -1.5472975 |
| C 3.7975208              | -1.1456130 | -3.5851900 |  | H | -1.0656971 | -1.9675650 | -1.8286933 |
| H 5.5049422              | -0.8097352 | -2.2988058 |  | H | -0.7916101 | -2.9429831 | 0.0778500  |
| H 1.9192663              | -1.4655956 | -4.6043346 |  | H | -2.2328044 | -4.0516466 | -3.6459546 |
| H 4.3896453              | -1.1583247 | -4.5019477 |  | H | -3.7499596 | -3.4309957 | -4.3721557 |
| C 1.8719150              | -2.6291634 | 1.2166986  |  | H | -2.4689331 | -2.2958141 | -3.8327014 |
| C 1.3947867              | -2.8698878 | 2.5198905  |  |   |            |            |            |
| C 2.6553578              | -3.6078258 | 0.5885459  |  |   |            |            |            |
| C 1.7144363              | -4.0525704 | 3.1841786  |  |   |            |            |            |

TsII\_IIIS.xyz

98

Energy = -2817.806626670

Rh -1.2871800 0.5296472 -0.2910907  
H -2.4437797 -0.5136917 -0.5476964  
H -2.5235694 1.4983334 1.5696702  
B -3.0827572 0.5607074 1.0204733  
H -3.2410894 -0.4299296 1.6815129  
C -6.4096934 1.0720943 -0.7213861  
C -5.7080112 2.1631201 -1.1504524  
H -7.4207144 0.7507344 -0.9420174  
H -5.9875981 2.9660762 -1.8222717  
C -4.3710769 0.9886077 0.2338868  
N -4.4682454 2.0947531 -0.5517706  
N -5.5742989 0.3611244 0.1197925  
C -2.1267904 2.3583423 -1.3387667  
C -2.1600700 1.2137202 -2.1437216  
H -3.1066779 0.7211976 -2.3728412  
H -1.3602677 1.0424205 -2.8701034  
H -1.3061243 3.0664026 -1.4643030  
P -0.4022951 -1.5436702 0.2874104  
P 0.7882696 1.7129910 0.0333598  
C 1.2842831 -1.6563153 1.0372395  
C 2.3778776 -1.0545667 0.3812438  
C 1.4803050 -2.3104783 2.2638903  
C 3.6476007 -1.0845534 1.0043877  
C 2.7435266 -2.3451858 2.8477628  
H 0.6503667 -2.8067158 2.7617087  
C 3.8291434 -1.7238817 2.2358841  
H 2.8846088 -2.8606262 3.7990613  
H 4.8061584 -1.7439312 2.7153752  
C 1.7091750 0.7941224 -1.2584566  
C 1.6099869 1.2552199 -2.5863069  
C 2.2890027 -0.4580764 -0.9843799  
C 2.1221446 0.4919739 -3.6293474  
H 1.1305865 2.2105046 -2.8011277  
C 2.8280909 -1.2054510 -2.0631670  
C 2.7390894 -0.7334371 -3.3780376  
H 2.0464460 0.8550379 -4.6555986  
H 3.1382667 -1.3167512 -4.2057073  
C -3.3495856 3.0146179 -0.7395969  
H -3.1053615 3.4640909 0.2351571  
H -3.7056053 3.8257351 -1.3948985  
C -1.4707058 -2.5373347 1.4007426  
C -2.1723939 -3.6573708 0.9337223  
C -1.6878335 -2.1009208 2.7191391  
C -3.0593246 -4.3365388 1.7739428  
H -2.0273658 -4.0066436 -0.0890194  
C -2.5572454 -2.7920334 3.5616623  
H -1.1786124 -1.2093561 3.0890975  
C -3.2485252 -3.9116503 3.0900906  
H -3.5943472 -5.2100132 1.3972726

H -2.7049803 -2.4463240 4.5859925  
H -3.9323059 -4.4505354 3.7479180  
C -0.2116022 -2.6077360 -1.2011318  
C 0.5562176 -3.7813483 -1.1170168  
C -0.8417369 -2.2859172 -2.4101331  
C 0.6774323 -4.6204920 -2.2242312  
H 1.0645224 -4.0356032 -0.1856539  
C -0.7084957 -3.1218262 -3.5204940  
H -1.4314648 -1.3716810 -2.4738176  
C 0.0491352 -4.2911921 -3.4292183  
H 1.2698963 -5.5337925 -2.1463648  
H -1.1975780 -2.8572970 -4.4594541  
H 0.1498923 -4.9475470 -4.2953411  
C 1.0129616 3.5006810 -0.3278876  
C 0.1031122 4.3768972 0.2873099  
C 2.0850940 4.0344434 -1.0582658  
C 0.2542515 5.7579452 0.1665919  
H -0.7181720 3.9679383 0.8818705  
C 2.2290266 5.4180075 -1.1850893  
H 2.8132237 3.3722349 -1.5286829  
C 1.3154412 6.2815283 -0.5769354  
H -0.4554521 6.4270443 0.6559560  
H 3.0652320 5.8219848 -1.7581868  
H 1.4332530 7.3614928 -0.6770718  
C 1.6709727 1.6356930 1.6367044  
C 2.9978894 2.0764060 1.7595784  
C 0.9586231 1.2527887 2.7801042  
C 3.6071622 2.1084250 3.0121484  
H 3.5563066 2.3885756 0.8757374  
C 1.5722372 1.2884495 4.0340106  
H -0.0808702 0.9314439 2.6809185  
C 2.8965369 1.7136375 4.1508484  
H 4.6392444 2.4518108 3.1034081  
H 1.0126614 0.9865791 4.9208203  
H 3.3752860 1.7457538 5.1308070  
O 3.4024769 -2.3879445 -1.7223810  
O 4.6375109 -0.4367408 0.3324437  
C 5.9478344 -0.4403094 0.8996130  
H 6.5748669 0.1220171 0.1992550  
H 5.9591386 0.0569171 1.8835081  
H 6.3389761 -1.4656928 1.0001670  
C 3.9520517 -3.1965395 -2.7627140  
H 4.3557281 -4.0840451 -2.2633266  
H 3.1751650 -3.5031789 -3.4816310  
H 4.7645026 -2.6720713 -3.2911456  
C -5.9434471 -0.8790655 0.7955037  
H -5.0333120 -1.3638151 1.1624281  
H -6.6080141 -0.6662653 1.6434077  
H -6.4560113 -1.5393096 0.0854099

TsIII\_IVS.xyz

98

Energy = -2817.807631559

Rh -1.2351188 0.3128552 -0.6568606  
H -2.1507865 -0.8230658 -1.3879826  
H -2.4017824 1.9202202 1.3671882  
B -2.6256790 0.7697040 1.0502347  
H -2.4136860 -0.0371509 1.9196302  
C -6.1072265 0.0523852 -0.2873775  
C -5.7274959 1.1248695 -1.0436957  
H -7.0272826 -0.5199586 -0.2829443  
H -6.2460220 1.6532237 -1.8351461  
C -4.0370372 0.6520567 0.3754255  
N -4.4670108 1.4831736 -0.6147340  
N -5.0589462 -0.2260193 0.5720178  
C -2.3662415 1.7406151 -1.8558032  
C -2.5208234 0.4322772 -2.4112092  
H -3.5179312 -0.0159510 -2.4565955  
H -1.8958710 0.1554247 -3.2655488  
H -1.6644139 2.4280784 -2.3342033  
P -0.2030715 -1.6083629 0.2028697  
P 0.4078575 1.7863048 0.0110855  
C 1.3907976 -1.4391815 1.1223683  
C 2.4107138 -0.6553643 0.5455539  
C 1.6067849 -2.0623631 2.3609200  
C 3.6142848 -0.4619535 1.2623754  
C 2.8074415 -1.8741577 3.0405471  
H 0.8460171 -2.7073793 2.7946866  
C 3.8077097 -1.0618157 2.5119705  
H 2.9657791 -2.3640647 4.0026010  
H 4.7314209 -0.9089822 3.0671221  
C 1.5475361 1.0112881 -1.1992325  
C 1.4444656 1.3973320 -2.5529446  
C 2.3232038 -0.1090642 -0.8404266  
C 2.1514947 0.7064289 -3.5309763  
H 0.8148998 2.2408450 -2.8348588  
C 3.0476094 -0.7861025 -1.8544511  
C 2.9616484 -0.3766132 -3.1912134  
H 2.0757888 1.0146498 -4.5749995  
H 3.5077520 -0.9069893 -3.9692171  
C -3.5603250 2.4441986 -1.2370922  
H -3.2383055 3.1701601 -0.4780936  
H -4.1361569 2.9924803 -1.9994444  
C -1.2780184 -2.6566714 1.2608338  
C -1.9470268 -3.7578719 0.7031140  
C -1.5350882 -2.3197823 2.6019397  
C -2.8313466 -4.5173689 1.4723295  
H -1.7671851 -4.0346385 -0.3366240  
C -2.4081686 -3.0899214 3.3726428  
H -1.0446606 -1.4586304 3.0549046  
C -3.0587107 -4.1917317 2.8113331  
H -3.3318526 -5.3773467 1.0240356

H -2.5798037 -2.8244282 4.4172282  
H -3.7362267 -4.7959201 3.4167368  
C 0.3195391 -2.7693933 -1.1326272  
C 1.1175115 -3.8788011 -0.8043986  
C -0.0507533 -2.5707690 -2.4679064  
C 1.5133185 -4.7791809 -1.7917166  
H 1.4335760 -4.0357148 0.2283137  
C 0.3555033 -3.4673506 -3.4595955  
H -0.6521420 -1.7029865 -2.7369968  
C 1.1332790 -4.5758340 -3.1226284  
H 2.1251652 -5.6417518 -1.5222692  
H 0.0635366 -3.2961022 -4.4969642  
H 1.4463162 -5.2808807 -3.8946281  
C 0.3001754 3.5688318 -0.4106631  
C -0.7735996 4.2807365 0.1497593  
C 1.2699708 4.2661235 -1.1476129  
C -0.8891543 5.6570092 -0.0437285  
H -1.5049931 3.7519927 0.7646108  
C 1.1468973 5.6437217 -1.3442417  
H 2.1278931 3.7394311 -1.5668746  
C 0.0671108 6.3409981 -0.7991216  
H -1.7248073 6.1983755 0.4031144  
H 1.9057569 6.1743179 -1.9217475  
H -0.0233354 7.4172750 -0.9530899  
C 1.2057087 1.9090336 1.6529723  
C 2.4042391 2.6231526 1.8110839  
C 0.5602938 1.3752829 2.7750244  
C 2.9612855 2.7744043 3.0792373  
H 2.9048604 3.0561717 0.9436655  
C 1.1205877 1.5340310 4.0439820  
H -0.3851154 0.8462800 2.6479301  
C 2.3215723 2.2289618 4.1973574  
H 3.8936579 3.3293261 3.1981748  
H 0.6144089 1.1159943 4.9156286  
H 2.7566965 2.3552474 5.1900409  
O 3.7834659 -1.8461980 -1.4349067  
O 4.5248155 0.3455163 0.6559542  
C 5.7621779 0.5847865 1.3275158  
H 6.3328343 1.2482213 0.6687170  
H 5.5991862 1.0814673 2.2979831  
H 6.3231316 -0.3513027 1.4805804  
C 4.4981490 -2.6046945 -2.4117975  
H 4.9986319 -3.4034836 -1.8540712  
H 3.8115158 -3.0497968 -3.1495502  
H 5.2531010 -1.9877211 -2.9253236  
C -5.0587046 -1.3092853 1.5477167  
H -5.2022147 -2.2700406 1.0371098  
H -4.0916197 -1.3168977 2.0576373  
H -5.8616861 -1.1567935 2.2805610



TsIV\_VS.xyz

98

Energy = -2817.815582085

|    |            |            |            |
|----|------------|------------|------------|
| Rh | 1.7655691  | 0.2406750  | -0.0137348 |
| H  | 3.9358954  | 0.4387424  | -0.9177908 |
| H  | 0.8260313  | 2.9234350  | 0.4957440  |
| B  | 1.7852744  | 2.2276732  | 0.7463889  |
| H  | 2.6852044  | 2.3571810  | -0.0796603 |
| C  | 2.4152312  | 3.2277758  | 4.3350251  |
| C  | 3.1809829  | 2.1007473  | 4.2684296  |
| H  | 2.2397852  | 3.9188563  | 5.1510397  |
| H  | 3.7876851  | 1.6103877  | 5.0203929  |
| C  | 2.2272273  | 2.3850734  | 2.2489466  |
| N  | 3.0533058  | 1.6017506  | 2.9890904  |
| N  | 1.8362956  | 3.3870994  | 3.0935654  |
| C  | 3.4555523  | -0.1231894 | 1.1580638  |
| C  | 4.4137136  | 0.4050145  | 0.0958525  |
| H  | 4.7457622  | 1.4326473  | 0.2954334  |
| H  | 5.2918720  | -0.2475116 | -0.0415407 |
| H  | 3.5000884  | -1.2234237 | 1.1811305  |
| P  | 0.4310328  | 0.4864528  | -1.9434214 |
| P  | 0.1981247  | -0.7341385 | 1.1831091  |
| C  | -1.3651778 | 0.7236674  | -1.6561261 |
| C  | -2.0854100 | -0.3181089 | -1.0365059 |
| C  | -1.9814521 | 1.9561529  | -1.9171790 |
| C  | -3.4385332 | -0.0850123 | -0.6841884 |
| C  | -3.3114717 | 2.1606841  | -1.5589508 |
| H  | -1.4268901 | 2.7503858  | -2.4145933 |
| C  | -4.0436950 | 1.1519226  | -0.9370736 |
| H  | -3.7888609 | 3.1188149  | -1.7710645 |
| H  | -5.0804561 | 1.3298305  | -0.6574347 |
| C  | -0.6361463 | -2.0619403 | 0.2036602  |
| C  | -0.3125774 | -3.4146938 | 0.4020913  |
| C  | -1.5505317 | -1.6974299 | -0.8106217 |
| C  | -0.8581693 | -4.3999323 | -0.4145238 |
| H  | 0.3371902  | -3.7131843 | 1.2191323  |
| C  | -2.0854154 | -2.7224347 | -1.6337986 |
| C  | -1.7285982 | -4.0625963 | -1.4466095 |
| H  | -0.6021669 | -5.4468037 | -0.2443912 |
| H  | -2.1365469 | -4.8415025 | -2.0880616 |
| C  | 3.6998812  | 0.3358968  | 2.5771061  |
| H  | 3.3405789  | -0.4236065 | 3.2843908  |
| H  | 4.7797890  | 0.4712645  | 2.7666818  |
| C  | 0.9515281  | 4.4908018  | 2.7335386  |
| H  | 1.3267179  | 5.0027359  | 1.8407197  |
| H  | -0.0602534 | 4.1157954  | 2.5360285  |
| H  | 0.9199147  | 5.1959185  | 3.5710414  |
| C  | 0.9016542  | -1.5210418 | 2.7001469  |
| C  | 0.6195404  | -0.9883088 | 3.9691757  |
| C  | 1.8618994  | -2.5469156 | 2.6075316  |
| C  | 1.2602677  | -1.4791838 | 5.1095129  |
| H  | -0.1029008 | -0.1790927 | 4.0733083  |

|   |            |            |            |
|---|------------|------------|------------|
| C | 2.4853112  | -3.0503894 | 3.7488526  |
| H | 2.1491986  | -2.9448880 | 1.6339490  |
| C | 2.1879855  | -2.5168318 | 5.0064903  |
| H | 1.0240997  | -1.0489092 | 6.0842589  |
| H | 3.2161287  | -3.8549808 | 3.6529478  |
| H | 2.6804100  | -2.9068973 | 5.8984343  |
| C | -1.2525437 | 0.1679344  | 1.8689247  |
| C | -2.2326164 | -0.5920756 | 2.5318408  |
| C | -1.4134962 | 1.5524581  | 1.7637820  |
| C | -3.3394961 | 0.0353707  | 3.1011341  |
| H | -2.1324527 | -1.6768354 | 2.5989449  |
| C | -2.5320305 | 2.1753280  | 2.3211640  |
| H | -0.6754199 | 2.1320027  | 1.2125903  |
| C | -3.4925431 | 1.4213968  | 2.9978040  |
| H | -4.0903337 | -0.5631229 | 3.6198082  |
| H | -2.6621881 | 3.2536453  | 2.2104409  |
| H | -4.3638071 | 1.9095354  | 3.4378169  |
| C | 0.5179177  | -1.0021645 | -3.0099643 |
| C | -0.3772519 | -1.1960038 | -4.0737765 |
| C | 1.5191192  | -1.9549691 | -2.7740791 |
| C | -0.2638446 | -2.3230274 | -4.8876224 |
| H | -1.1696387 | -0.4681852 | -4.2567301 |
| C | 1.6249520  | -3.0878135 | -3.5817930 |
| H | 2.2159135  | -1.8132801 | -1.9422152 |
| C | 0.7333956  | -3.2715826 | -4.6412821 |
| H | -0.9576771 | -2.4618965 | -5.7187432 |
| H | 2.4024448  | -3.8273040 | -3.3844003 |
| H | 0.8170925  | -4.1540938 | -5.2776616 |
| C | 0.9687838  | 1.8458637  | -3.0599143 |
| C | 1.3803829  | 1.6069112  | -4.3810952 |
| C | 1.0478108  | 3.1564026  | -2.5539967 |
| C | 1.8401239  | 2.6561277  | -5.1803885 |
| H | 1.3489351  | 0.5988249  | -4.7933893 |
| C | 1.4951235  | 4.2022706  | -3.3602024 |
| H | 0.7713440  | 3.3569121  | -1.5193661 |
| C | 1.8929984  | 3.9562879  | -4.6768640 |
| H | 2.1574915  | 2.4509289  | -6.2040963 |
| H | 1.5420969  | 5.2139466  | -2.9534227 |
| H | 2.2497413  | 4.7741931  | -5.3047238 |
| O | -4.0751538 | -1.1275697 | -0.0859542 |
| O | -2.9443857 | -2.3044115 | -2.5999910 |
| C | -5.4442805 | -0.9621763 | 0.2786848  |
| H | -5.7483784 | -1.9154742 | 0.7247892  |
| H | -5.5656707 | -0.1557294 | 1.0206287  |
| H | -6.0722585 | -0.7523178 | -0.6022719 |
| C | -3.5380487 | -3.2867780 | -3.4481704 |
| H | -4.1892869 | -2.7309681 | -4.1315422 |
| H | -2.7735314 | -3.8278785 | -4.0293949 |
| H | -4.1408088 | -4.0051179 | -2.8692421 |

TsV\_VIS.xyz

98

Energy = -2817.803423396

Rh -1.3315235 0.0072872 -0.3416420  
H -2.4698314 0.4752511 -2.8830948  
H -2.7917071 -0.4484706 1.7461913  
B -3.1133639 -0.3455246 0.5745626  
H -2.6329479 -1.2123186 -0.2965979  
C -6.9066486 -0.2982867 0.5916221  
C -6.5712770 0.9549257 0.1565659  
H -7.8758064 -0.7488122 0.7718441  
H -7.1911630 1.8059236 -0.0992630  
C -4.6748450 -0.2041655 0.4453037  
N -5.1949809 0.9789196 0.0732092  
N -5.7225170 -0.9970218 0.7715609  
C -3.0230722 1.3955588 -0.9835122  
C -3.3699393 0.8246120 -2.3567203  
H -4.0543622 -0.0352602 -2.2938653  
H -3.8538077 1.5882845 -2.9952277  
H -2.3296123 2.2335190 -1.0942571  
P 0.2259500 -1.6561370 -0.1658071  
P 0.2605492 1.6180654 -0.1259299  
C 1.4765764 -1.4168035 1.1627905  
C 2.4642336 -0.4276686 0.9871764  
C 1.3718803 -2.0990357 2.3850018  
C 3.3175156 -0.1205946 2.0756071  
C 2.2259690 -1.7842984 3.4380787  
H 0.6351617 -2.8889552 2.5137760  
C 3.1895734 -0.7883816 3.2993294  
H 2.1408336 -2.3225492 4.3834438  
H 3.8426864 -0.5465545 4.1358473  
C 1.9104669 1.2558657 -0.8755783  
C 2.3066812 1.9012174 -2.0585892  
C 2.7310048 0.2570867 -0.3130033  
C 3.4911570 1.5444951 -2.6950525  
H 1.7030716 2.7015899 -2.4790785  
C 3.9267929 -0.0982341 -0.9879086  
C 4.3003198 0.5371938 -2.1770123  
H 3.7886100 2.0578095 -3.6107951  
H 5.2171662 0.2585559 -2.6932173  
C -4.2446973 2.0278972 -0.3233465  
H -3.9701626 2.6106417 0.5689443  
H -4.7697118 2.6979454 -1.0257010  
C -5.6087970 -2.3804339 1.2197814  
H -6.1120860 -3.0502227 0.5106309  
H -4.5473136 -2.6480105 1.2704583  
H -6.0610044 -2.4915840 2.2137588  
C -0.2132593 3.2353256 -0.8777821  
C -0.3055722 4.4194091 -0.1334738  
C -0.5851119 3.2609355 -2.2362669  
C -0.7331118 5.6050451 -0.7390945  
H -0.0466805 4.4226056 0.9252674

C -0.9984278 4.4466472 -2.8411382  
H -0.5651630 2.3374568 -2.8199117  
C -1.0720394 5.6251408 -2.0922621  
H -0.7971654 6.5180996 -0.1448702  
H -1.2724587 4.4480767 -3.8974083  
H -1.4000429 6.5534911 -2.5623791  
C 0.6519305 2.0354978 1.6146638  
C 1.7540934 2.8525498 1.9158819  
C -0.1619013 1.5605045 2.6511932  
C 2.0280372 3.1936181 3.2400495  
H 2.4059958 3.2082125 1.1161985  
C 0.1239814 1.8939645 3.9760010  
H -1.0068047 0.9135404 2.4051027  
C 1.2166377 2.7122247 4.2719498  
H 2.8822800 3.8339453 3.4671287  
H -0.5067109 1.5105913 4.7797523  
H 1.4379403 2.9751679 5.3077842  
C 1.2032200 -2.0709394 -1.6558900  
C 2.3007393 -2.9439181 -1.5817879  
C 0.8278226 -1.5335541 -2.8944906  
C 3.0067128 -3.2753426 -2.7378749  
H 2.6093874 -3.3516092 -0.6175462  
C 1.5437851 -1.8588164 -4.0475487  
H -0.0237922 -0.8494590 -2.9398310  
C 2.6320487 -2.7311599 -3.9704741  
H 3.8545718 -3.9600031 -2.6763683  
H 1.2527117 -1.4295131 -5.0074670  
H 3.1899249 -2.9883990 -4.8724110  
C -0.6307712 -3.2379038 0.2523486  
C -0.5247252 -4.3754756 -0.5597350  
C -1.4681518 -3.2908410 1.3818380  
C -1.2322554 -5.5403922 -0.2459806  
H 0.1055473 -4.3580842 -1.4485825  
C -2.1559374 -4.4597749 1.7036278  
H -1.5899609 -2.4058295 2.0080412  
C -2.0427856 -5.5903870 0.8873832  
H -1.1420869 -6.4130939 -0.8947685  
H -2.7795945 -4.4907035 2.5996202  
H -2.5843474 -6.5044007 1.1361329  
O 4.2358126 0.8547576 1.8410806  
O 4.6498194 -1.0934708 -0.4080214  
C 5.1383947 1.1967729 2.8918654  
H 5.7814433 1.9845067 2.4842355  
H 4.5992481 1.5827307 3.7726472  
H 5.7573026 0.3336924 3.1864056  
C 5.8727937 -1.4874841 -1.0286852  
H 6.2806512 -2.2845733 -0.3974810  
H 5.6982340 -1.8774838 -2.0449934  
H 6.5889277 -0.6508921 -1.0719853

VIR.1.xyz

121

Energy = -3226.384437318

Rh -0.0462269 -0.7169601 0.4994739

H -1.8140848 -0.4418499 0.3962287

H -1.8330185 -2.8911093 3.1705779

B -1.9714415 -1.7449099 0.5390724

H -0.8160567 -2.2638298 0.9214952

C -3.3663748 -3.2027219 -2.6935440

C -4.3505158 -3.3390270 -1.7471950

H -3.3609754 -3.4612771 -3.7462325

H -5.3631741 -3.7135777 -1.8313174

C -2.5626587 -2.4114832 -0.7678861

N -3.8200430 -2.8594365 -0.5763557

N -2.2709471 -2.6287012 -2.0712587

C -3.1565551 -2.1251150 1.6078643

C -2.6994833 -3.2238824 2.5820411

H -2.3912964 -4.1328344 2.0405263

H -3.4998811 -3.5072572 3.2832098

H -3.4502280 -1.2404563 2.1930513

P 2.0054895 -1.4689394 0.9421904

P 0.7295287 1.2066102 -0.3104108

C 3.4144600 -0.3106556 1.1605881

C 3.8231594 0.5348034 0.1087530

C 4.0108817 -0.2043432 2.4279017

C 4.8282961 1.4988513 0.3731618

C 5.0095165 0.7370028 2.6556222

H 3.6937744 -0.8595309 3.2370365

C 5.4195268 1.5950232 1.6381935

H 5.4713935 0.8098403 3.6414260

H 6.1901154 2.3380953 1.8361191

C 1.9745344 0.8792833 -1.6291347

C 1.5659904 0.8800338 -2.9728055

C 3.2790445 0.4698131 -1.2817556

C 2.4396451 0.4589566 -3.9706843

H 0.5665932 1.2204924 -3.2398581

C 4.1477898 0.0419848 -2.3171403

C 3.7258722 0.0276850 -3.6522396

H 2.1182962 0.4689982 -5.0136408

H 4.3960580 -0.3030626 -4.4436914

C -4.3710910 -2.5852485 0.7605616

H -4.8552170 -3.4944330 1.1470768

H -5.1305707 -1.7991230 0.6392896

C -1.0051345 -2.2874099 -2.7120208

H -0.3729274 -1.7738468 -1.9679103

H -0.4934494 -3.1945453 -3.0584277

H -1.1864225 -1.6197270 -3.5640770

O 5.1368302 2.3227165 -0.6652651

O 5.3890964 -0.3496758 -1.9180554

C 6.1579157 3.3000166 -0.4702027

H 6.2430715 3.8324691 -1.4238045

H 5.8855172 4.0133744 0.3252133

H 7.1235935 2.8287696 -0.2253050

C 6.3171202 -0.7745598 -2.9151089

H 7.2353960 -1.0280846 -2.3740331

H 5.9505090 -1.6646087 -3.4529345

H 6.5281540 0.0308696 -3.6370479

C -0.6156648 2.1584434 -1.1485931

C -0.7460966 3.5515362 -1.0328933

C -1.5743669 1.4552227 -1.8975341

C -1.8019581 4.2182798 -1.6610737

H -0.0326162 4.1244562 -0.4415206

C -2.6208883 2.1209941 -2.5343413

H -1.5186469 0.3679929 -1.9530311

C -2.7370668 3.5080980 -2.4166251

H -1.8916570 5.3006498 -1.5532639

H -3.3691997 1.5468675 -3.0817121

H -3.5643435 4.0310495 -2.8992314

C 1.4840533 2.4567013 0.7942932

C 2.2642288 3.5094795 0.2897074

C 1.2182703 2.3903445 2.1684692

C 2.7617556 4.4859696 1.1525671

H 2.4975110 3.5533383 -0.7758184

C 1.7228546 3.3662923 3.0299800

H 0.6219553 1.5587069 2.5526133

C 2.4915643 4.4165644 2.5227202

H 3.3649252 5.3037277 0.7536624

H 1.5199227 3.3033202 4.1003509

H 2.8853150 5.1799617 3.1958398

C 1.9185847 -2.3719121 2.5420804

C 2.6738393 -3.5268676 2.7927191

C 1.0627367 -1.8793312 3.5407178

C 2.5736351 -4.1757079 4.0254746

H 3.3393330 -3.9237043 2.0246336

C 0.9692049 -2.5267331 4.7727436

H 0.4612457 -0.9898187 3.3327607

C 1.7241174 -3.6777484 5.0163037

H 3.1617672 -5.0760598 4.2107655

H 0.3008575 -2.1360914 5.5420213

H 1.6472089 -4.1889170 5.9773583

C 2.6119603 -2.7534503 -0.2213769

C 3.9653111 -2.8659851 -0.5677719

C 1.6954483 -3.6921117 -0.7223809

C 4.3894386 -3.8903431 -1.4183081

H 4.6896621 -2.1483578 -0.1830226

C 2.1236014 -4.7184076 -1.5627746

H 0.6433220 -3.6175193 -0.4406275

C 3.4725081 -4.8158773 -1.9191711

H 5.4457224 -3.9677465 -1.6825465

H 1.4044780 -5.4488531 -1.9385244

H 3.8073532 -5.6170022 -2.5800040

C -3.7094724 1.7839404 2.2836568

C -2.7558020 2.3195092 3.0499011

H -2.7450069 2.1777396 4.1311241

|   |            |            |            |
|---|------------|------------|------------|
| H | -1.9442918 | 2.9107893  | 2.6174562  |
| C | -3.7258849 | 1.8914652  | 0.7896918  |
| H | -2.9734905 | 2.6133654  | 0.4400355  |
| H | -3.4947656 | 0.9230249  | 0.3241897  |
| H | -4.5158595 | 1.1954282  | 2.7346751  |
| N | -5.0362451 | 2.2746049  | 0.2599073  |
| C | -5.7046058 | 3.4351128  | 0.6164629  |
| C | -6.8605109 | 3.4561555  | -0.1032533 |
| H | -5.3053568 | 4.1281041  | 1.3470967  |
| N | -6.8658352 | 2.3118684  | -0.8821723 |
| H | -7.6701926 | 4.1756947  | -0.1251253 |
| C | -7.9296626 | 1.9122904  | -1.7918031 |
| H | -7.5008133 | 1.6647185  | -2.7706319 |
| H | -8.4440425 | 1.0222135  | -1.4056504 |
| H | -8.6422892 | 2.7383454  | -1.8913851 |
| C | -5.7430716 | 1.5695043  | -0.6690429 |
| B | -5.4107307 | 0.1921065  | -1.3879965 |
| H | -5.5089834 | 0.3531892  | -2.6015375 |
| H | -4.2862608 | -0.1884441 | -1.1027814 |
| H | -6.2574095 | -0.6336437 | -1.0457843 |

VIIa.xyz

121

Energy = -3226.385457261

|    |            |            |            |
|----|------------|------------|------------|
| Rh | -0.5471846 | -0.2901995 | 0.4323020  |
| H  | -2.5748806 | -0.4639735 | -0.2862489 |
| H  | -2.5271169 | -2.6685112 | 2.6319178  |
| B  | -2.3974891 | -1.6755610 | -0.0856592 |
| H  | -1.3247862 | -1.8758646 | 0.6304731  |
| C  | -2.3959022 | -3.5250507 | -3.4311352 |
| C  | -3.4273050 | -4.0539552 | -2.6995782 |
| H  | -2.0482354 | -3.7571425 | -4.4312773 |
| H  | -4.1528946 | -4.8185422 | -2.9504896 |
| C  | -2.3984978 | -2.4985031 | -1.4429137 |
| N  | -3.4007228 | -3.4047079 | -1.4856271 |
| N  | -1.7811777 | -2.5640820 | -2.6455929 |
| C  | -3.5820555 | -2.4948505 | 0.7340228  |
| C  | -3.0198848 | -3.3223707 | 1.8991620  |
| H  | -2.2628577 | -4.0439035 | 1.5494561  |
| H  | -3.8048818 | -3.8915115 | 2.4225615  |
| H  | -4.3312636 | -1.7996569 | 1.1378308  |
| P  | 1.3027403  | -1.4859152 | 0.5078618  |
| P  | 0.4915339  | 1.5565791  | -0.2164653 |
| C  | 2.9444313  | -0.6412086 | 0.5307865  |
| C  | 3.3588963  | 0.2399970  | -0.4924185 |
| C  | 3.7506362  | -0.8174914 | 1.6689964  |
| C  | 4.5796522  | 0.9444270  | -0.3225430 |
| C  | 4.9551988  | -0.1351005 | 1.7978202  |
| H  | 3.4309970  | -1.4878417 | 2.4637213  |
| C  | 5.3760593  | 0.7514071  | 0.8105951  |
| H  | 5.5708076  | -0.2864059 | 2.6858575  |
| H  | 6.3106406  | 1.2956905  | 0.9332375  |

|   |            |            |            |
|---|------------|------------|------------|
| C | 1.3966077  | 1.2339257  | -1.7863132 |
| C | 0.8010252  | 1.5724579  | -3.0121526 |
| C | 2.6057086  | 0.5086966  | -1.7553808 |
| C | 1.3905339  | 1.1756037  | -4.2089164 |
| H | -0.1229532 | 2.1488223  | -3.0299343 |
| C | 3.1848510  | 0.1164909  | -2.9880973 |
| C | 2.5731090  | 0.4376413  | -4.2068689 |
| H | 0.9277003  | 1.4473743  | -5.1593191 |
| H | 3.0236218  | 0.1359862  | -5.1508799 |
| C | -4.2884036 | -3.3983455 | -0.3096095 |
| H | -4.4370064 | -4.4319953 | 0.0377726  |
| H | -5.2642363 | -2.9964642 | -0.6219898 |
| C | -0.6488816 | -1.7397658 | -3.0534316 |
| H | -0.3873858 | -1.0836856 | -2.2097248 |
| H | 0.2120726  | -2.3751508 | -3.2954090 |
| H | -0.9234573 | -1.1331632 | -3.9257830 |
| O | 4.8861088  | 1.8317878  | -1.3096875 |
| O | 4.3535293  | -0.5781320 | -2.8967216 |
| C | 6.1097995  | 2.5576908  | -1.2073376 |
| H | 6.1520047  | 3.1928282  | -2.0990476 |
| H | 6.1271590  | 3.1911639  | -0.3050689 |
| H | 6.9797295  | 1.8808992  | -1.1976141 |
| C | 5.0071054  | -0.9691381 | -4.1033439 |
| H | 5.9166112  | -1.4932079 | -3.7897650 |
| H | 4.3788338  | -1.6513280 | -4.6999557 |
| H | 5.2806477  | -0.0932855 | -4.7136689 |
| C | -0.7645452 | 2.8391905  | -0.6678572 |
| C | -0.5545369 | 4.2152370  | -0.4919992 |
| C | -1.9947593 | 2.4096206  | -1.1946363 |
| C | -1.5458527 | 5.1353232  | -0.8431649 |
| H | 0.3842943  | 4.5780536  | -0.0735642 |
| C | -2.9836889 | 3.3284048  | -1.5452143 |
| H | -2.1745316 | 1.3400255  | -1.3253555 |
| C | -2.7612120 | 4.6964713  | -1.3712478 |
| H | -1.3617682 | 6.2023328  | -0.7043768 |
| H | -3.9339605 | 2.9735914  | -1.9482700 |
| H | -3.5342506 | 5.4171782  | -1.6429307 |
| C | 1.6639802  | 2.4762761  | 0.8497434  |
| C | 2.5455623  | 3.4362235  | 0.3262130  |
| C | 1.6435255  | 2.2364564  | 2.2307838  |
| C | 3.3812198  | 4.1566942  | 1.1795646  |
| H | 2.5945769  | 3.6017584  | -0.7517922 |
| C | 2.4858856  | 2.9561734  | 3.0807871  |
| H | 0.9671814  | 1.4768626  | 2.6293922  |
| C | 3.3512190  | 3.9194983  | 2.5574684  |
| H | 4.0629466  | 4.9029308  | 0.7671177  |
| H | 2.4717004  | 2.7559132  | 4.1534150  |
| H | 4.0099738  | 4.4810480  | 3.2220436  |
| C | 1.2354064  | -2.3880944 | 2.1176945  |
| C | 1.8580458  | -3.6337616 | 2.2989977  |
| C | 0.5372745  | -1.8092835 | 3.1894722  |
| C | 1.7796995  | -4.2865273 | 3.5304686  |

|                          |            |            |            |   |            |            |            |
|--------------------------|------------|------------|------------|---|------------|------------|------------|
| H                        | 2.4057709  | -4.0969113 | 1.4769894  | H | -0.4407462 | -4.6682799 | -3.8333076 |
| C                        | 0.4606176  | -2.4649834 | 4.4189481  | H | -2.3382908 | -6.1324043 | -2.4186936 |
| H                        | 0.0346744  | -0.8490708 | 3.0468022  | C | -1.6761873 | -3.1554333 | -1.2201020 |
| C                        | 1.0799189  | -3.7052028 | 4.5914044  | N | -2.3220653 | -4.3419023 | -1.1894590 |
| H                        | 2.2661829  | -5.2548247 | 3.6598725  | N | -0.8727397 | -3.1935871 | -2.3073760 |
| H                        | -0.0928684 | -2.0059220 | 5.2397910  | C | -3.1329444 | -3.2306800 | 0.7835171  |
| H                        | 1.0151704  | -4.2214558 | 5.5507118  | C | -2.4947110 | -3.6619228 | 2.1105487  |
| C                        | 1.5162192  | -2.8828814 | -0.6748591 | H | -1.5080084 | -4.1280919 | 1.9529410  |
| C                        | 2.5997974  | -2.9727713 | -1.5588010 | H | -3.1186309 | -4.3869734 | 2.6578939  |
| C                        | 0.5294882  | -3.8851525 | -0.7064365 | H | -4.1163662 | -2.7888530 | 1.0055698  |
| C                        | 2.6723916  | -4.0195565 | -2.4831725 | P | 1.3659863  | -1.1442355 | 0.9469299  |
| H                        | 3.3995516  | -2.2346023 | -1.5256378 | P | 0.2471466  | 1.6393477  | -0.3724129 |
| C                        | 0.6123025  | -4.9361989 | -1.6171414 | C | 2.8256933  | -0.0197416 | 1.0877205  |
| H                        | -0.3052373 | -3.8444036 | -0.0048175 | C | 3.2666628  | 0.7780723  | 0.0094440  |
| C                        | 1.6781294  | -4.9988539 | -2.5225929 | C | 3.4367921  | 0.1098244  | 2.3468838  |
| H                        | 3.5231283  | -4.0755980 | -3.1651992 | C | 4.3110699  | 1.7109740  | 0.2410773  |
| H                        | -0.1581682 | -5.7094670 | -1.6221861 | C | 4.4720670  | 1.0174907  | 2.5424235  |
| H                        | 1.7411426  | -5.8186263 | -3.2400487 | H | 3.0962218  | -0.4977096 | 3.1825123  |
| C                        | -5.4647842 | 0.7001753  | 0.1432440  | C | 4.9126858  | 1.8259177  | 1.4983439  |
| C                        | -6.6521042 | 0.6015854  | -0.4589552 | H | 4.9367801  | 1.1050289  | 3.5257430  |
| H                        | -6.7353442 | 0.3848047  | -1.5248082 | H | 5.7110444  | 2.5456793  | 1.6696204  |
| H                        | -7.5875754 | 0.7248500  | 0.0929048  | C | 1.4361286  | 1.2091809  | -1.7158469 |
| C                        | -5.2870380 | 0.9554752  | 1.6117747  | C | 1.0229996  | 1.2466103  | -3.0575746 |
| H                        | -6.2595039 | 1.0840925  | 2.1094935  | C | 2.7158948  | 0.7218881  | -1.3789393 |
| H                        | -4.7581292 | 0.1200797  | 2.0921337  | C | 1.8662728  | 0.7851641  | -4.0639773 |
| H                        | -4.5380372 | 0.5654235  | -0.4226031 | H | 0.0425188  | 1.6428047  | -3.3170261 |
| N                        | -4.4712011 | 2.1440275  | 1.8771484  | C | 3.5578570  | 0.2635200  | -2.4232281 |
| C                        | -4.9148799 | 3.4411970  | 1.6884912  | C | 3.1291205  | 0.2818892  | -3.7564137 |
| C                        | -3.8886781 | 4.2602227  | 2.0493960  | H | 1.5412183  | 0.8233217  | -5.1052283 |
| H                        | -5.9061993 | 3.6642304  | 1.3133504  | H | 3.7800134  | -0.0707234 | -4.5545732 |
| N                        | -2.8445032 | 3.4455798  | 2.4440405  | C | -3.3622040 | -4.4474208 | -0.1509034 |
| H                        | -3.8118097 | 5.3405366  | 2.0534165  | H | -3.2681637 | -5.4173513 | 0.3611403  |
| C                        | -1.5568916 | 3.9164653  | 2.9346165  | H | -4.3433400 | -4.4149274 | -0.6486868 |
| H                        | -1.4071187 | 3.5906625  | 3.9714828  | C | 0.0087900  | -2.1114107 | -2.7261784 |
| H                        | -0.7467162 | 3.5111674  | 2.3186029  | H | -0.0382177 | -1.3220356 | -1.9602607 |
| H                        | -1.5394653 | 5.0102051  | 2.8807677  | H | 1.0417703  | -2.4730323 | -2.8028438 |
| C                        | -3.1872336 | 2.1299167  | 2.3387035  | H | -0.3178870 | -1.7096329 | -3.6940572 |
| B                        | -2.2568883 | 0.8928855  | 2.6610690  | O | 4.6469746  | 2.4902598  | -0.8241104 |
| H                        | -2.8726036 | -0.1414830 | 2.7973917  | O | 4.7868531  | -0.1822309 | -2.0381336 |
| H                        | -1.4699153 | 0.8071658  | 1.6482249  | C | 5.6999467  | 3.4380475  | -0.6593133 |
| H                        | -1.5138695 | 1.1361619  | 3.5953292  | H | 5.8014665  | 3.9385583  | -1.6286342 |
| VIIb.xyz                 |            |            |            | H | 5.4512362  | 4.1836494  | 0.1139696  |
| 121                      |            |            |            | H | 6.6502175  | 2.9429578  | -0.4008228 |
| Energy = -3226.386176385 |            |            |            | C | 5.6939982  | -0.6264256 | -3.0458818 |
| Rh                       | -0.6138174 | -0.2173161 | 0.4725071  | H | 6.6050738  | -0.9210314 | -2.5135916 |
| H                        | -2.7859257 | -1.2378910 | -0.5976845 | H | 5.2936457  | -1.4951225 | -3.5948612 |
| H                        | -2.3319131 | -2.7927803 | 2.7629560  | H | 5.9301348  | 0.1810906  | -3.7576360 |
| B                        | -2.1903198 | -2.1678851 | -0.0866646 | C | -1.0741327 | 2.6022261  | -1.2452520 |
| H                        | -1.2573701 | -1.8547267 | 0.7587908  | C | -1.1369003 | 4.0026619  | -1.2522110 |
| C                        | -1.0143019 | -4.4141048 | -2.9494636 | C | -2.0845605 | 1.8817944  | -1.9081661 |
| C                        | -1.9397820 | -5.1395553 | -2.2471239 | C | -2.1809954 | 4.6655633  | -1.9046030 |
|                          |            |            |            | H | -0.3747114 | 4.5878512  | -0.7377955 |

|   |            |            |            |                          |            |            |            |
|---|------------|------------|------------|--------------------------|------------|------------|------------|
| C | -3.1201961 | 2.5438794  | -2.5665186 | H                        | -5.1860079 | 4.7798595  | 0.6996723  |
| H | -2.0587533 | 0.7888814  | -1.8881100 | C                        | -2.7534314 | 4.0789114  | 1.8624026  |
| C | -3.1742006 | 3.9406229  | -2.5640037 | H                        | -3.0120470 | 4.3662512  | 2.8907086  |
| H | -2.2116371 | 5.7568991  | -1.8985149 | H                        | -1.8073451 | 3.5320077  | 1.8679837  |
| H | -3.8936717 | 1.9685238  | -3.0785185 | H                        | -2.6490226 | 4.9759875  | 1.2417855  |
| H | -3.9874698 | 4.4594846  | -3.0739897 | C                        | -3.7819924 | 1.8706495  | 1.2656263  |
| C | 1.1139395  | 2.9193893  | 0.6170683  | B                        | -2.6219477 | 0.8850127  | 1.7291783  |
| C | 1.8781267  | 3.9315893  | 0.0129328  | H                        | -3.0787073 | -0.1282302 | 2.2150649  |
| C | 0.9801861  | 2.8966062  | 2.0120228  | H                        | -2.1747235 | 0.6189234  | 0.5385933  |
| C | 2.4792117  | 4.9168917  | 0.7964189  | H                        | -1.8286280 | 1.4482564  | 2.4489320  |
| H | 2.0209379  | 3.9348289  | -1.0693650 |                          |            |            |            |
| C | 1.5892486  | 3.8803378  | 2.7939122  | VIIc.xyz                 |            |            |            |
| H | 0.4083751  | 2.0899505  | 2.4759581  | 121                      |            |            |            |
| C | 2.3341953  | 4.8941763  | 2.1871724  | Energy = -3226.392656199 |            |            |            |
| H | 3.0677798  | 5.7032404  | 0.3199497  | Rh                       | -0.8214754 | -0.0861804 | 0.1105257  |
| H | 1.4893556  | 3.8483246  | 3.8801283  | P                        | 0.4345750  | -1.7062166 | 0.9957764  |
| H | 2.8105942  | 5.6627874  | 2.7981268  | P                        | 0.9712681  | 0.8842083  | -0.7923327 |
| C | 1.1633210  | -1.8154262 | 2.6556432  | C                        | 0.4402102  | 1.8347910  | -2.2896939 |
| C | 1.9082883  | -2.9080842 | 3.1266762  | C                        | 0.9501794  | 3.0894338  | -2.6512070 |
| C | 0.2311155  | -1.2051875 | 3.5097963  | C                        | -0.5269810 | 1.2355690  | -3.1186450 |
| C | 1.7162860  | -3.3834122 | 4.4253256  | C                        | 0.5238798  | 3.7175446  | -3.8264084 |
| H | 2.6414489  | -3.3912611 | 2.4794813  | H                        | 1.6842555  | 3.5866732  | -2.0171808 |
| C | 0.0422632  | -1.6818206 | 4.8074763  | C                        | -0.9490736 | 1.8614132  | -4.2921616 |
| H | -0.3594786 | -0.3622611 | 3.1395088  | H                        | -0.9422223 | 0.2654732  | -2.8320167 |
| C | 0.7823471  | -2.7738153 | 5.2670631  | C                        | -0.4193861 | 3.1040929  | -4.6536232 |
| H | 2.2996468  | -4.2349654 | 4.7797251  | H                        | 0.9388944  | 4.6904033  | -4.0970751 |
| H | -0.6918919 | -1.2020567 | 5.4569626  | H                        | -1.6888207 | 1.3738836  | -4.9298116 |
| H | 0.6311750  | -3.1514704 | 6.2797054  | H                        | -0.7424651 | 3.5921633  | -5.5746949 |
| C | 2.0092719  | -2.6256079 | 0.0600398  | C                        | 2.2184509  | -0.2892369 | -1.4884909 |
| C | 3.2418132  | -2.6412822 | -0.6053228 | C                        | 3.0562812  | -1.0000225 | -0.6063358 |
| C | 1.2208647  | -3.7895033 | 0.0563912  | C                        | 2.2654109  | -0.5503598 | -2.8669151 |
| C | 3.6572012  | -3.7844793 | -1.2951027 | C                        | 3.9276806  | -1.9821920 | -1.1378718 |
| H | 3.8924872  | -1.7686795 | -0.5791301 | C                        | 3.1346486  | -1.5155358 | -3.3672765 |
| C | 1.6443763  | -4.9336977 | -0.6169685 | H                        | 1.6300574  | 0.0036316  | -3.5551452 |
| H | 0.2750609  | -3.8013569 | 0.5996655  | C                        | 3.9638433  | -2.2392595 | -2.5133985 |
| C | 2.8599057  | -4.9301794 | -1.3098511 | H                        | 3.1673579  | -1.7101348 | -4.4405450 |
| H | 4.6212396  | -3.7817765 | -1.8076726 | H                        | 4.6297226  | -2.9981129 | -2.9201175 |
| H | 1.0241525  | -5.8315321 | -0.6002732 | C                        | 2.0350191  | 2.0583903  | 0.1430869  |
| H | 3.1911637  | -5.8240989 | -1.8409087 | C                        | 3.2388935  | 2.5549652  | -0.3837977 |
| C | -5.5498006 | -0.1579270 | -1.0115184 | C                        | 1.6480850  | 2.4308900  | 1.4357759  |
| C | -6.6825304 | -0.5737358 | -1.5821718 | C                        | 4.0167606  | 3.4431988  | 0.3595114  |
| H | -6.7323228 | -0.8144560 | -2.6446820 | H                        | 3.5827894  | 2.2237729  | -1.3654244 |
| H | -7.6013335 | -0.7013384 | -1.0039747 | C                        | 2.4384937  | 3.3016470  | 2.1867365  |
| C | -5.4122730 | 0.1398721  | 0.4516476  | H                        | 0.7415335  | 1.9848874  | 1.8495370  |
| H | -6.3662208 | -0.0195598 | 0.9763145  | C                        | 3.6178708  | 3.8192937  | 1.6457080  |
| H | -4.6504360 | -0.5065526 | 0.9094359  | H                        | 4.9476623  | 3.8291159  | -0.0599557 |
| H | -4.6360909 | -0.0452536 | -1.6018257 | H                        | 2.1507636  | 3.5591884  | 3.2081107  |
| N | -4.9716952 | 1.5193467  | 0.7016287  | H                        | 4.2360756  | 4.5017779  | 2.2316311  |
| C | -5.7167267 | 2.6394812  | 0.3859162  | C                        | 0.9556910  | -3.1736326 | 0.0236339  |
| C | -4.9780257 | 3.7188148  | 0.7658475  | C                        | 1.9097518  | -4.0783206 | 0.5190827  |
| H | -6.6881510 | 2.5717988  | -0.0887348 | C                        | 0.3831623  | -3.3967430 | -1.2349189 |
| N | -3.7976689 | 3.2314659  | 1.2977738  | C                        | 2.2631994  | -5.2017285 | -0.2283869 |



|   |            |            |            |   |            |            |            |
|---|------------|------------|------------|---|------------|------------|------------|
| C | 3.2139414  | -1.0042026 | -2.2226619 | H | 6.8178571  | 1.9619746  | -0.1512618 |
| C | 1.5485282  | 0.0356872  | -3.6268353 | H | 7.3924735  | 0.3781473  | -0.7892994 |
| H | 0.2866220  | 1.5050291  | -2.6929636 | C | 4.6708087  | -2.7167220 | -3.0341862 |
| C | 2.5880352  | -0.8776123 | -3.4690672 | H | 5.4727183  | -3.3308757 | -2.6098043 |
| H | 1.0623573  | 0.1294217  | -4.5989912 | H | 3.8574201  | -3.3704452 | -3.3896784 |
| H | 2.9027814  | -1.4891591 | -4.3126591 | H | 5.0682019  | -2.1271283 | -3.8765905 |
| C | 2.4512093  | 2.3638805  | 0.9229955  | C | -5.5790039 | -0.6785322 | 3.6879330  |
| C | 3.3311641  | 3.1001297  | 0.1123061  | C | -4.7817369 | 0.1186810  | 4.4551709  |
| C | 2.6738051  | 2.3075866  | 2.3041416  | C | -3.5987403 | -0.4708080 | 2.6254307  |
| C | 4.4032836  | 3.7843077  | 0.6844940  | N | -4.8397401 | -1.0312831 | 2.5758758  |
| H | 3.1842460  | 3.1240987  | -0.9691556 | H | -6.5945423 | -1.0228294 | 3.8421946  |
| C | 3.7542675  | 2.9825135  | 2.8734961  | H | -4.9688371 | 0.6041262  | 5.4055657  |
| H | 2.0112105  | 1.6985494  | 2.9219492  | N | -3.5748796 | 0.2317095  | 3.7933277  |
| C | 4.6165772  | 3.7269388  | 2.0653031  | C | -2.4362241 | 1.0212742  | 4.2808101  |
| H | 5.0789795  | 4.3594507  | 0.0488291  | H | -1.5413504 | 0.3806820  | 4.2759773  |
| H | 3.9284088  | 2.9200486  | 3.9488315  | H | -2.6680469 | 1.2740223  | 5.3270994  |
| H | 5.4596429  | 4.2581967  | 2.5101695  | C | -2.1987926 | 2.2611820  | 3.4665895  |
| C | 1.0566491  | -2.6058154 | -0.0381892 | H | -3.0885372 | 2.8211620  | 3.1627840  |
| C | 2.0388431  | -3.5901108 | -0.2420928 | C | -0.9771315 | 2.6874630  | 3.1337426  |
| C | -0.0391944 | -2.5264283 | -0.9078424 | H | -0.0835172 | 2.1368853  | 3.4346915  |
| C | 1.9077711  | -4.4944350 | -1.2959094 | H | -0.8261157 | 3.6048395  | 2.5648468  |
| H | 2.9135019  | -3.6370570 | 0.4095823  | C | -5.3215927 | -1.9068802 | 1.5095263  |
| C | -0.1533302 | -3.4187289 | -1.9745659 | B | -2.4681569 | -0.6265706 | 1.5287700  |
| H | -0.7820800 | -1.7387367 | -0.7700659 | H | -2.7712582 | -1.4727861 | 0.7232888  |
| C | 0.8150813  | -4.4070299 | -2.1651584 | H | -2.2608691 | 0.4782445  | 0.9592457  |
| H | 2.6690354  | -5.2623199 | -1.4461725 | H | -1.4147512 | -1.0098135 | 2.1820983  |
| H | -0.9928925 | -3.3179683 | -2.6641022 | H | -4.7044143 | -2.8111253 | 1.4549120  |
| H | 0.7249193  | -5.1074566 | -2.9976414 | H | -6.3586214 | -2.1809605 | 1.7306358  |
| C | 0.9791038  | -2.3875382 | 2.8837371  | H | -5.2739082 | -1.3926360 | 0.5433698  |
| C | 0.9137707  | -1.6910548 | 4.1043686  | H | -1.7182201 | -0.2990733 | -2.2581119 |
| C | 0.7866384  | -3.7751779 | 2.8815975  | B | -2.5833544 | -0.6446012 | -3.0582924 |
| C | 0.6839062  | -2.3711882 | 5.2987323  | H | -2.0790999 | -1.3569710 | -3.9147549 |
| H | 1.0388120  | -0.6052493 | 4.1052742  | C | -3.2721883 | 0.6674347  | -3.6365502 |
| C | 0.5419624  | -4.4533069 | 4.0797392  | C | -3.9359320 | -1.2763181 | -2.3153667 |
| H | 0.8168078  | -4.3300046 | 1.9435378  | N | -4.4702890 | 0.9217928  | -3.0622928 |
| C | 0.4940877  | -3.7573217 | 5.2881348  | N | -3.0650279 | 1.6804722  | -4.5118433 |
| H | 0.6490384  | -1.8201410 | 6.2403789  | C | -4.6716898 | -2.2892987 | -3.1995304 |
| H | 0.3896255  | -5.5338094 | 4.0641534  | H | -3.6730264 | -1.7532778 | -1.3580789 |
| H | 0.3066101  | -4.2913332 | 6.2210802  | C | -4.8339329 | -0.0535147 | -2.0182581 |
| C | 2.9967142  | -0.9739302 | 1.3203565  | C | -5.0244001 | 2.0868026  | -3.5523690 |
| C | 3.7821435  | -1.1387707 | 2.4724969  | C | -4.1348339 | 2.5681511  | -4.4754946 |
| C | 3.5399082  | -0.3723649 | 0.1668257  | C | -1.8648370 | 1.8190927  | -5.3220594 |
| C | 5.1025451  | -0.6988744 | 2.4853259  | H | -4.0286868 | -3.1557246 | -3.4089132 |
| H | 3.3665895  | -1.6221720 | 3.3548682  | H | -4.9368536 | -1.8491279 | -4.1749721 |
| C | 4.8790490  | 0.0880546  | 0.2137576  | H | -5.6033132 | -2.6628126 | -2.7388895 |
| C | 5.6544877  | -0.0753282 | 1.3684047  | H | -5.9164935 | -0.2552253 | -2.0709786 |
| H | 5.7122804  | -0.8383733 | 3.3794876  | H | -4.6046493 | 0.3988221  | -1.0379465 |
| H | 6.6833719  | 0.2785803  | 1.4006460  | H | -5.9881497 | 2.4691655  | -3.2377436 |
| O | 5.3247321  | 0.7046122  | -0.9129977 | H | -4.1821900 | 3.4444540  | -5.1119765 |
| O | 4.2280947  | -1.8747206 | -1.9714924 | H | -1.3374480 | 0.8588471  | -5.3064177 |
| C | 6.6644281  | 1.1940521  | -0.9275829 | H | -2.1332802 | 2.0723075  | -6.3554219 |
| H | 6.8042912  | 1.6428781  | -1.9171118 | H | -1.2117062 | 2.6019587  | -4.9110621 |



TsVII\_IS.xyz

121

Energy = -3226.367425658

|    |            |            |            |
|----|------------|------------|------------|
| Rh | -0.4206045 | 0.9582048  | 0.2774907  |
| P  | 0.7863249  | -0.3255098 | 1.5535737  |
| P  | 1.2981257  | 1.2568772  | -1.1225195 |
| C  | 0.5651498  | 1.8818276  | -2.6881899 |
| C  | 1.0462321  | 3.0171400  | -3.3594491 |
| C  | -0.5905925 | 1.2389624  | -3.1706911 |
| C  | 0.3891904  | 3.4935840  | -4.4958840 |
| H  | 1.9322242  | 3.5380339  | -2.9960574 |
| C  | -1.2300193 | 1.7092038  | -4.3182062 |
| H  | -0.9935397 | 0.3584827  | -2.6618774 |
| C  | -0.7463296 | 2.8400870  | -4.9811212 |
| H  | 0.7736630  | 4.3773796  | -5.0078934 |
| H  | -2.1005327 | 1.1701754  | -4.6970453 |
| H  | -1.2487428 | 3.2091357  | -5.8768997 |
| C  | 2.1197864  | -0.3349098 | -1.5339205 |
| C  | 3.0056038  | -0.9022603 | -0.5955165 |
| C  | 1.7667210  | -1.0387847 | -2.6945043 |
| C  | 3.5217355  | -2.1961870 | -0.8477748 |
| C  | 2.2880577  | -2.3094847 | -2.9203473 |
| H  | 1.0845725  | -0.6012225 | -3.4206730 |
| C  | 3.1591142  | -2.8966335 | -2.0047103 |
| H  | 2.0081659  | -2.8549504 | -3.8228086 |
| H  | 3.5487120  | -3.8952434 | -2.1941340 |
| C  | 2.6914928  | 2.3991444  | -0.7795857 |
| C  | 3.8104440  | 2.4446244  | -1.6272609 |
| C  | 2.6335496  | 3.2517770  | 0.3308863  |
| C  | 4.8426417  | 3.3479585  | -1.3743790 |
| H  | 3.8786875  | 1.7624371  | -2.4767943 |
| C  | 3.6725320  | 4.1472984  | 0.5878273  |
| H  | 1.7795563  | 3.1789332  | 1.0086075  |
| C  | 4.7751788  | 4.2006030  | -0.2679783 |
| H  | 5.7057913  | 3.3834107  | -2.0415724 |
| H  | 3.6260348  | 4.7981280  | 1.4624462  |
| H  | 5.5863706  | 4.9033436  | -0.0703689 |
| C  | 0.7829445  | -2.1283129 | 1.2232497  |
| C  | 1.6841157  | -2.9730700 | 1.8945266  |
| C  | -0.1273893 | -2.6714268 | 0.3063602  |
| C  | 1.6559131  | -4.3484305 | 1.6658518  |
| H  | 2.4227258  | -2.5523944 | 2.5792812  |
| C  | -0.1383236 | -4.0477914 | 0.0709044  |
| H  | -0.8006081 | -2.0116445 | -0.2472352 |
| C  | 0.7453944  | -4.8876541 | 0.7521509  |
| H  | 2.3552406  | -4.9988283 | 2.1944527  |
| H  | -0.8330270 | -4.4619017 | -0.6612807 |
| H  | 0.7320119  | -5.9628758 | 0.5648705  |
| C  | 0.1287578  | -0.1676453 | 3.2744449  |
| C  | -0.2083621 | 1.1187012  | 3.7313083  |
| C  | -0.0737107 | -1.2624820 | 4.1268556  |

|   |            |            |            |
|---|------------|------------|------------|
| C | -0.7142621 | 1.3099810  | 5.0166643  |
| H | -0.0739990 | 1.9682268  | 3.0569618  |
| C | -0.5899955 | -1.0705747 | 5.4124101  |
| H | 0.1654166  | -2.2710156 | 3.7890648  |
| C | -0.9073159 | 0.2128250  | 5.8622257  |
| H | -0.9626570 | 2.3166200  | 5.3575680  |
| H | -0.7409331 | -1.9322529 | 6.0650262  |
| H | -1.3026597 | 0.3583902  | 6.8689932  |
| C | 2.5753968  | 0.0659473  | 1.7253045  |
| C | 3.0533178  | 0.7065108  | 2.8796571  |
| C | 3.4404003  | -0.1925923 | 0.6429339  |
| C | 4.3887302  | 1.0914194  | 2.9597353  |
| H | 2.3878546  | 0.8937557  | 3.7207107  |
| C | 4.7899928  | 0.2269881  | 0.7408685  |
| C | 5.2598702  | 0.8639010  | 1.8965309  |
| H | 4.7590747  | 1.5798451  | 3.8625323  |
| H | 6.2973880  | 1.1847716  | 1.9703130  |
| O | 5.5555746  | -0.0082416 | -0.3561435 |
| O | 4.3501140  | -2.6935268 | 0.1101238  |
| C | 6.9247287  | 0.3920047  | -0.3214102 |
| H | 7.3406680  | 0.1058030  | -1.2935804 |
| H | 7.0185535  | 1.4824713  | -0.1885680 |
| H | 7.4750023  | -0.1273736 | 0.4799221  |
| C | 4.8999862  | -3.9948857 | -0.0868532 |
| H | 5.5313302  | -4.1847053 | 0.7882330  |
| H | 4.1075164  | -4.7595689 | -0.1400519 |
| H | 5.5165234  | -4.0372394 | -0.9994626 |
| C | -4.0978520 | 2.1065299  | 3.9118379  |
| C | -3.8236805 | 3.2463135  | 3.2147606  |
| C | -3.2925781 | 1.4924718  | 1.8970703  |
| N | -3.7733376 | 1.0451431  | 3.0869060  |
| H | -4.4917483 | 1.9640016  | 4.9107507  |
| H | -3.9481438 | 4.2891964  | 3.4809780  |
| N | -3.3330831 | 2.8479169  | 1.9840230  |
| C | -2.9022899 | 3.7386711  | 0.9049166  |
| H | -3.2623422 | 4.7453059  | 1.1686984  |
| H | -3.4094809 | 3.4370332  | -0.0225864 |
| C | -1.4143894 | 3.7706729  | 0.6968784  |
| H | -0.7969182 | 3.8699866  | 1.5946775  |
| C | -0.8613581 | 3.8474055  | -0.5236435 |
| H | -1.4639379 | 3.7806256  | -1.4323192 |
| H | 0.2031551  | 4.0299568  | -0.6556953 |
| C | -3.8612018 | -0.3634809 | 3.4521781  |
| B | -2.7613990 | 0.6105921  | 0.6989367  |
| H | -3.4404317 | -0.3841910 | 0.5529903  |
| H | -2.6292855 | 1.2391938  | -0.3454389 |
| H | -1.6781323 | 0.0254794  | 1.1022423  |
| H | -2.8604545 | -0.7570708 | 3.6739413  |
| H | -4.4966348 | -0.4605154 | 4.3388546  |
| H | -4.2936359 | -0.9274210 | 2.6176028  |
| H | -1.9111475 | -1.2894987 | -1.9710714 |
| B | -2.7741132 | -1.7101161 | -2.7446755 |

H -2.6122979 -1.2360635 -3.8601493  
C -4.1832690 -1.3814182 -2.0774067  
C -2.9114890 -3.3676488 -2.6904516  
N -4.6936889 -2.4453510 -1.4174651  
N -5.0706105 -0.3757137 -1.8897665  
C -3.5138972 -3.9448384 -3.9769432  
H -1.9382697 -3.8495047 -2.5065896  
C -3.8368086 -3.6435280 -1.4830792  
C -5.8804278 -2.1254541 -0.7929387  
C -6.1245344 -0.8127654 -1.0954367  
C -4.9150337 0.9634369 -2.4295105

H -2.8584988 -3.7390573 -4.8345725  
H -4.4880382 -3.4799451 -4.2031355  
H -3.6701275 -5.0358340 -3.9213629  
H -4.4703049 -4.5388765 -1.5871323  
H -3.2772888 -3.7180513 -0.5360122  
H -6.4627315 -2.8364396 -0.2188411  
H -6.9591370 -0.1713957 -0.8362545  
H -3.9850440 0.9901889 -3.0067734  
H -5.7603429 1.2153175 -3.0842221  
H -4.8503363 1.6954458 -1.6128886
